# Supplementary material
Source: PubMed Central journal article supplement (PMC2916745)
Supplement: NIHMS191224-supplement-1_si_001.pdf [file NIHMS191224-supplement-1_si_001.pdf]

---

**Supporting Information for –**

**Characterization of the Pharmacophore Properties of Novel Selective Estrogen Receptor  
Downregulators (SERDs)**

Karen J. Kieser<sup>a,b,‡</sup>, Dong Wook Kim<sup>a,‡</sup>, Kathryn E. Carlson<sup>a</sup>, Benita S. Katzenellenbogen<sup>b</sup>, John A.  
Katzenellenbogen<sup>b\*</sup>

---

|             | <b>Contents</b>                                                                                   | <b>Page</b> |
|-------------|---------------------------------------------------------------------------------------------------|-------------|
| <b>I.</b>   | <b>Synthesis and Spectroscopic Characterization (9-12, 14-46)</b>                                 | <b>S2</b>   |
| <b>II.</b>  | <b><sup>1</sup>H and <sup>13</sup>C NMR Spectra (9-12, 14-46)</b>                                 | <b>S14</b>  |
| <b>III.</b> | <b>Normal and Reversed Phase HPLC Chromatograms (11,<br/>15, 17, 22-26, 29, 31-36, 42-44, 46)</b> | <b>S33</b>  |

---

## I. Synthesis and Spectroscopic Characterization

**Synthesis Materials and Methods.** Reactions using moisture- or airsensitive reagents were performed in anhydrous solvents, which were collected using a solvent dispensing system built by J. C. Meyer based on a design developed by Pangborn et al. Reaction progress was followed by TLC on 0.25 mm silica gel glass plates containing F-254 indicator. Visualization on TLC was monitored by UV light or phosphomolybdic acid indicator. Reactions were performed under a nitrogen atmosphere unless noted otherwise.  $^1\text{H}$  spectra were obtained on 400 or 500 MHz spectrometers.  $^{13}\text{C}$  NMR spectra were acquired at 100 or 125 MHz. The chemical shifts were reported in parts per million and were referenced to the internal solvent peaks. Coupling constants were reported in hertz. Mass spectra were recorded under electron impact conditions at 70 eV. McMurry coupled compounds **7** and **8** were synthesized according to published procedures.<sup>14</sup>

All compounds assayed were >95% pure in two different HPLC systems (normal and reversed phase); see below. All compounds prepared had spectroscopic data ( $^1\text{H}$  and  $^{13}\text{C}$  NMR) fully consistent with their assigned structures.

**General Procedure for *O*-Alkylation Reaction.** To the mixture of McMurry coupled compound (1.0 equiv) and  $\text{Cs}_2\text{CO}_3$  or  $\text{K}_2\text{CO}_3$  (3 equiv) in  $\text{CH}_3\text{CN}$  (15 mL) was added each bromo-ester (1.0 equiv). The mixture was stirred at room temperature for 24 h. The reaction mixture was poured into 1 N HCl (100 mL) and extracted from the aqueous phase with EtOAc. The organic layer was dried with  $\text{MgSO}_4$  and evaporated under reduced pressure. Flash column chromatography (20% EtOAc/hexane) gave the alkylated products.

**General Procedure for Heck Coupling Reaction.** To the mixture of triflate compound (**11** or **38**, 1.0 equiv),  $\text{Pd}(\text{PPh}_3)_2\text{Cl}_2$  (0.2 equiv) and triethylamine (1.0 mL) in DMF (3.0 mL) was added each alkene-ester (10 equiv) at room temperature under  $\text{N}_2$  atmosphere. The mixture was stirred at 120 °C for 24 h. The reaction mixture was cooled to room temperature and was poured into 1 N HCl (30 mL) and extracted from the aqueous phase with EtOAc. The organic layer was dried with  $\text{MgSO}_4$  and evaporated under reduced pressure. Flash column chromatography (20% EtOAc/hexane) gave the Heck-coupled products.

**General Procedure for Hydrolysis of Ester.** To the solution of the ester (1.0 equiv) in  $\text{CH}_3\text{OH}$  (4.0 mL) was added 2N KOH (2.0 mL). The mixture was stirred at room temperature for 24 h. The reaction mixture was poured into 1 N HCl (4.0 mL) and extracted from the aqueous phase with EtOAc. The organic layer was dried with  $\text{MgSO}_4$  and evaporated under reduced pressure. Flash column chromatography (10%  $\text{CH}_3\text{OH}/\text{CH}_2\text{Cl}_2$ ) gave the acid products.

**9-[(4-hydroxyphenyl)(phenyl)methylene]bicyclo[3.3.1]nonane (9).** Titanium(IV) chloride (1.76 mL, 16.06 mmol) was added slowly at -10 °C to a stirred suspension of zinc powder (2.1 g, 32.12 mmol) in 25

mL of anhydrous THF under nitrogen atmosphere. Addition of titanium(IV) chloride released a yellow fume, and the reaction mixture turned a yellow-green color. The cooling was removed, and the reaction mixture was refluxed for 2.5 h. The reaction mixture was then cooled to room temperature. A solution of each 4-hydroxybenzophenone (0.86 g, 4.34 mmol) and bicyclo[3.3.1]nonan-9-one (0.6 g, 4.34 mmol) dissolved in THF (20 mL) was injected by syringe, and the reaction was refluxed for 2 h. The reaction mixture was cooled to room temperature and was poured slowly into a NaHCO<sub>3</sub> solution (300 mL). Et<sub>2</sub>O (150 mL) was added to the aqueous solution with vigorous stirring, and the heterogeneous solution was filtered through Celite. After the organic layer was decanted and saved, the aqueous layer was extracted with additional Et<sub>2</sub>O (150 mL). The ether layer was dried (MgSO<sub>4</sub>) and evaporated under reduced pressure. Flash column chromatography (30% Et<sub>2</sub>OAc/hexane) gave **9** (1.15 g, 87%): <sup>1</sup>H NMR (400 MHz, CDCl<sub>3</sub>) δ 7.30-7.26 (m, 2H), 7.21-7.15 (m, 3H), 7.05-7.02 (m, 2H), 2.09-1.98 (m, 2H), 1.88-1.70 (m, 8H), 1.63-1.56 (m, 2H); <sup>13</sup>C NMR (100 MHz, CDCl<sub>3</sub>) δ 153.67, 145.45, 143.29, 135.70, 130.54, 129.26, 127.91, 125.87, 114.96, 114.76, 34.13, 34.03, 33.76, 21.66; MS (EI) *m/z* 304 (M<sup>+</sup>, 100), 261, 222. HRMS (EI) *m/z* calcd for C<sub>22</sub>H<sub>24</sub>O 304.1827, found 304.1820.

**9-[(4-*tert*-Butyldimethylsilyloxyphenyl) (4-hydroxyphenyl) methylene]bicyclo[3.3.1]-nonane (10).** To the mixture of **7** (1.50 g, 4.68 mmol) and imidazole (0.48 g, 7.02 mmol) in THF (40 mL) was added TBDMSCl (1.06 g, 7.02 mmol) at room temperature. The mixture was stirred at room temperature for 24 h. The reaction mixture was poured into water (200 mL) and extracted from the aqueous phase with EtOAc (200 mL). The organic layer was dried with MgSO<sub>4</sub> and evaporated under reduced pressure. The residue was purified by flash column chromatography (20% EtOAc/hexane) to provide **10** (0.91 g, 45%): <sup>1</sup>H NMR (400 MHz, CDCl<sub>3</sub>) δ 7.03-7.00 (m, 4H), 6.77-6.73 (m, 4H), 5.64 (br, 1H), 2.72 (m, 2H), 2.09-1.98 (m, 2H), 1.87-1.78 (m, 8H), 1.61-1.58 (m, 2H), 1.00 (s, 9H), 0.22 (s, 6H); <sup>13</sup>C NMR (100 MHz, CDCl<sub>3</sub>) δ 153.67, 153.579, 144.77, 136.31, 135.86, 130.48, 130.26, 130.23, 119.26, 114.73, 34.06, 34.01, 33.73, 25.62, 21.66, 18.09, -4.44 ; MS (EI) *m/z* 434 (M<sup>+</sup>), 132, 75 (100). HRMS (EI) *m/z* calcd for C<sub>28</sub>H<sub>38</sub>O<sub>2</sub>Si 434.2641, found 434.2643.

**9-[(4-Trifluoromethanesulfonylphenyl) (4-hydroxyphenyl) methylene]bicyclo[3.3.1]-nonane (11).** To the mixture of **10** (2.10 g, 4.83 mmol) and triflic anhydride (1.06 mL, 6.28 mmol) in CH<sub>2</sub>Cl<sub>2</sub> (50 mL) was added triethylamine (0.88 mL, 6.28 mmol) at 0 °C. The mixture was stirred at room temperature for 8 h. The reaction mixture was poured into water (200 mL) and extracted from the aqueous phase with EtOAc. The organic layer was dried with MgSO<sub>4</sub> and evaporated under reduced pressure. The residue was purified by flash column chromatography (20% EtOAc/hexane) to provide **11** (1.73 g, 79%) as a colorless oil: <sup>1</sup>H NMR (500 MHz, CDCl<sub>3</sub>) δ 7.21-7.15 (m, 4H), 7.00-6.98 (m, 2H), 6.76-6.74 (m, 2H), 4.80 (br, 1H), 2.70-2.60 (m,

2H), 2.07-2.00 (m, 2H), 1.82-1.78 (m, 8H), 1.61-1.57 (m, 2H);  $^{13}\text{C}$  NMR (125 MHz,  $\text{CDCl}_3$ )  $\delta$  154.05, 147.72, 147.30, 143.59, 134.83, 130.98, 130.56, 128.93, 120.77, 118.70 (q,  $J = 318.8$  Hz), 115.02, 34.21, 34.19, 33.79, 33.72, 21.52; MS (EI)  $m/z$  452 ( $\text{M}^+$ , 100), 319, 237. HRMS (EI)  $m/z$  calcd for  $\text{C}_{23}\text{H}_{23}\text{O}_3\text{SF}_3$  452.1269, found 452.1264.

**2,2'-[4,4'-(Bicyclo[3.3.1]non-9-ylidenemethylene)bis(4,1-phenylene)]bis(oxy)diacetic acid (12).** To the mixture of **7** (0.12 g, 0.37 mmol) and  $\text{Cs}_2\text{CO}_3$  (0.29 g, 0.88 mmol) in  $\text{CH}_3\text{CN}$  (15 mL) was added methyl bromoacetate (0.08 mL, 0.08 mmol). The mixture was stirred at room temperature for 24 h. The reaction mixture was poured into 1 N HCl (100 mL) and extracted from the aqueous phase with EtOAc. The organic layer was dried with  $\text{MgSO}_4$  and evaporated under reduced pressure. 2N KOH (2.0 mL) was added to the reaction residue dissolved in  $\text{CH}_3\text{OH}$  (4.0 mL). The mixture was stirred at room temperature for 24 h, and poured into 1 N HCl (4.0 mL) and extracted from the aqueous phase with EtOAc. The organic layer was dried with  $\text{MgSO}_4$  and evaporated under reduced pressure. Flash column chromatography ( $\text{CH}_3\text{COOH}/\text{CH}_3\text{OH}/\text{CH}_2\text{Cl}_2 = 1/9/90$ ) gave **12** (0.12 g, 75%):  $^1\text{H}$  NMR (400 MHz,  $\text{DMSO}-d_4$ )  $\delta$  6.95 (d,  $J = 8.4$  Hz, 4H), 6.77 (d,  $J = 8.0$  Hz, 2H), 4.49 (s, 4H), 2.57 (m, 2H), 1.98-1.89 (m, 2H), 1.71 (m, 8H), 1.52-1.50 (m, 2H);  $^{13}\text{C}$  NMR (100 MHz, methanol- $d_4$ )  $\delta$  171.00, 156.38, 143.83, 135.19, 129.98, 129.78, 114.03, 65.29, 33.60, 33.26, 21.26; MS (ESI)  $m/z$  437 ( $\text{M}^+ + 1$ , 100), 379. HRMS (ESI)  $m/z$  calcd for  $\text{C}_{26}\text{H}_{29}\text{O}_6$  437.1964, found 437.1952.

**Methyl 2-[4-[bicyclo[3.3.1]non-9-ylidene[4-(tert-butyl)dimethylsilyloxyphenyl]methyl]phenoxy]acetate (14).** According to the general procedure for *O*-alkylation reaction with **10** (0.15 g, 0.34 mmol) and methyl 2-bromoacetate (0.1 mL, 1.02 mmol), the isolated yield of product **14** was 0.14 g (82%) as a colorless oil.  $^1\text{H}$  NMR (400 MHz,  $\text{CDCl}_3$ )  $\delta$  7.10-6.98 (m, 4H), 6.84-6.72 (m, 4H), 4.62 (s, 2H), 3.81 (s, 3H), 2.70-2.69 (m, 2H), 2.06-1.99 (m, 2H), 1.85-1.74 (m, 8H), 1.61-1.57 (m, 2H), 0.99 (s, 9H), 0.21 (s, 6H);  $^{13}\text{C}$  NMR (100 MHz,  $\text{CDCl}_3$ )  $\delta$  169.51, 155.94, 153.68, 145.04, 136.93, 136.08, 130.39, 130.22, 130.12, 119.24, 133.95, 65.29, 52.15, 34.02, 33.73, 33.70, 25.60, 21.62, 18.06, -4.45; MS (EI)  $m/z$  506 ( $\text{M}^+$ , 100), 463, 299. HRMS (EI)  $m/z$  calcd for  $\text{C}_{31}\text{H}_{42}\text{O}_4\text{Si}$  506.2852, found 506.2853.

**2-[4-[Bicyclo[3.3.1]non-9-ylidene(4-hydroxyphenyl)methyl]phenoxy]acetic acid (15).** Starting from 0.1 g (0.20 mmol) of the ester **14** and using the general procedure for hydrolysis of ester, 0.07 g (93%) of acid product **15** was obtained:  $^1\text{H}$  NMR (400 MHz, methanol- $d_4$ )  $\delta$  6.98 (d,  $J = 6.8$  Hz, 2H), 6.88 (d,  $J = 6.4$  Hz, 2H), 6.80 (d,  $J = 6.8$  Hz, 2H), 6.66 (d,  $J = 6.8$  Hz, 2H), 4.40 (s, 2H), 2.65-2.62 (m, 2H), 2.03-1.97 (m, 2H), 1.77-1.70 (m, 8H), 1.55-1.53 (m, 2H);  $^{13}\text{C}$  NMR (100 MHz, methanol- $d_4$ )  $\delta$  177.06, 157.95, 156.62, 145.22,

137.68, 135.78, 132.31, 131.27, 131.21, 1115.69, 115.37, 68.14, 35.39, 34.77, 34.73, 22.72; MS (EI)  $m/z$  387 ( $M^+$ ), 334, 150 (100). HRMS (EI)  $m/z$  calcd for  $C_{24}H_{26}O_4$  378.1831, found 378.1826.

**(E)-Ethyl 3-[4-[bicyclo[3.3.1]non-9-ylidene(4-hydroxyphenyl)methyl]phenyl]acrylate (16).** Following the general procedure for Heck coupling reaction and using the triflate **11** and ethyl acrylate as the reactants, 0.14 g (72%) of **16** was obtained as a white solid: mp 69-70 °C;  $^1H$  NMR (400 MHz,  $CDCl_3$ )  $\delta$  7.66 (d,  $J = 16.4$  Hz, 1H), 7.41 (d,  $J = 8.0$  Hz, 2H), 7.16 (d,  $J = 8.0$  Hz, 2H), 7.00 (d,  $J = 8.4$  Hz, 2H), 6.79-6.75 (m, 2H), 6.39 (d,  $J = 16.4$  Hz, 1H), 4.26 (q,  $J = 7.1$  Hz, 2H), 2.71-2.68 (m, 2H), 2.06-1.99 (m, 2H), 1.33 (t,  $J = 7.0$  Hz, 3H);  $^{13}C$  NMR (100 MHz,  $CDCl_3$ )  $\delta$  167.52, 154.32, 146.58, 145.71, 144.80, 134.74, 131.94, 130.54, 130.08, 129.84, 144.80, 134.74, 131.94, 130.54, 130.08, 129.84, 127.78, 117.10, 114.95, 60.58, 34.26, 34.17, 33.79, 33.74, 21.56, 14.25; MS (EI)  $m/z$  402 ( $M^+$ , 100), 281, 107. HRMS (EI)  $m/z$  calcd for  $C_{27}H_{30}O_3$  402.2195, found 402.2190.

**(E)-3-[4-[bicyclo[3.3.1]non-9-ylidene(4-hydroxyphenyl)methyl]phenyl]acrylic acid (17).** Starting from 0.09 g (0.22 mmol) of the ester **16** and using the general procedure for hydrolysis of ester, 0.07 g (88%) of acid product **17** was obtained:  $^1H$  NMR (400 MHz, methanol- $d_4$ )  $\delta$  7.63 (d,  $J = 16.0$  Hz, 1H), 7.48 (d,  $J = 8.0$  Hz, 2H), 7.15 (d,  $J = 8.0$  Hz, 2H), 6.93 (d,  $J = 8.4$  Hz, 2H), 6.71-6.68 (m, 2H), 6.42 (d,  $J = 15.6$  Hz, 1H), 2.69-2.63 (m, 2H), 2.09-2.01 (m, 2H), 1.87-1.75 (m, 8H), 1.59-1.56 (m, 2H);  $^{13}C$  NMR (100 MHz, methanol- $d_4$ )  $\delta$  170.56, 157.01, 147.16, 146.88, 146.22, 134.99, 133.52, 132.28, 131.41, 130.94, 128.90, 118.58, 115.85, 35.69, 35.53, 34.81, 34.76, 22.86; MS (EI)  $m/z$  374 ( $M^+$ ), 149, 135 (100). HRMS (EI)  $m/z$  calcd for  $C_{25}H_{26}O_3$  374.1882, found 374.1888.

**(E)-Methyl 4-[4-[bicyclo[3.3.1]non-9-ylidene(4-hydroxyphenyl)methyl]phenyl]but-3-enoate (18).** Following the general procedure for Heck coupling reaction and using the triflate **11** and methyl 3-butenolate as the reactants, 0.11 g (61%) of **18** was obtained as a colorless oil:  $^1H$  NMR (400 MHz,  $CDCl_3$ )  $\delta$  7.27 (d,  $J = 8.4$  Hz, 2H), 7.08 (d,  $J = 8.4$  Hz, 2H), 7.02-6.99 (m, 2H), 6.75-6.72 (m, 2H), 6.46 (d,  $J = 16.0$  Hz, 1H), 6.28-6.21 (m, 1H), 4.98 (s, 1H), 3.71 (s, 3H), 3.24 (d,  $J = 7.2$  Hz, 2H), 2.67 (m, 2H), 2.06-1.98 (m, 2H), 1.86-1.74 (m, 8H), 1.61-1.56 (m, 2H);  $^{13}C$  NMR (100 MHz,  $CDCl_3$ )  $\delta$  173.25, 154.84, 146.72, 143.78, 136.44, 135.39, 134.36, 131.56, 131.28, 130.54, 126.87, 115.80, 52.97, 39.29, 35.21, 35.11, 34.77, 22.63; MS (EI)  $m/z$  402 ( $M^+$ , 100). HRMS (EI)  $m/z$  calcd for  $C_{27}H_{30}O_3$  402.2195, found 402.2200.

**(E)-Ethyl 5-[4-[bicyclo[3.3.1]non-9-ylidene(4-hydroxyphenyl)methyl]phenyl]pent-4-enoate (19).** Following the general procedure for Heck coupling reaction and using the triflate **11** and methyl 4-pentenoate as the reactants, 0.13 g (41%) of **19** was obtained as a colorless oil:  $^1H$  NMR (500 MHz,  $CDCl_3$ )  $\delta$  7.24 (d,  $J = 8.5$  Hz, 2H), 7.08 (d,  $J = 8.5$  Hz, 2H), 7.00 (d,  $J = 8.5$  Hz, 2H), 6.74 (d,  $J = 8.5$  Hz, 2H), 6.39

(d,  $J = 16.0$  Hz, 1H), 6.19-6.13 (m, 1H), 4.14 (q,  $J = 7.2$  Hz, 2H), 2.74-2.70 (m, 2H), 2.54-2.45 (m, 4H), 2.06-1.97 (m, 2H), 1.80-1.77 (m, 8H), 1.59-1.56 (m, 2H), 1.26 (t,  $J = 7.0$  Hz, 3H);  $^{13}\text{C}$  NMR (125 MHz,  $\text{CDCl}_3$ )  $\delta$  173.22, 153.96, 145.56, 142.36, 135.42, 134.97, 130.76, 130.57, 130.37, 129.53, 127.81, 125.61, 114.80, 60.46, 34.17, 34.12, 34.08, 33.76, 28.27, 21.63, 14.20; MS (EI)  $m/z$  430 ( $\text{M}^+$ , 100), 310, 170. HRMS (EI)  $m/z$  calcd for  $\text{C}_{29}\text{H}_{34}\text{O}_3$  430.2508, found 430.2511.

**(E)-Methyl 6-[4-[bicyclo[3.3.1]non-9-ylidene(4-hydroxyphenyl)methyl]phenyl]hex-5-enoate (20).**

Following the general procedure for Heck coupling reaction and using the triflate **11** and methyl 5-hexenoate as the reactants, 0.17 g (38%) of **20** was obtained as a colorless oil:  $^1\text{H}$  NMR (400 MHz,  $\text{CDCl}_3$ )  $\delta$  7.25 (d,  $J = 8.0$  Hz, 2H), 7.08 (d,  $J = 12.0$  Hz, 2H), 7.01 (d,  $J = 8.8$  Hz, 2H), 6.75 (d,  $J = 8.8$  Hz, 2H), 6.37 (d,  $J = 16.0$  Hz, 1H), 6.17-6.10 (m, 1H), 3.68 (s, 3H), 2.72 (m, 2H), 2.37 (t,  $J = 7.6$  Hz, 2H), 2.24 (q,  $J = 6.8$  Hz, 2H), 2.08-1.97 (m, 2H), 1.85-1.78 (m, 8H), 1.61-1.56 (m, 2H);  $^{13}\text{C}$  NMR (100 MHz,  $\text{CDCl}_3$ )  $\delta$  175.46, 154.98, 146.42, 143.21, 136.33, 136.10, 131.64, 131.51, 130.48, 146.42, 143.21, 136.33, 136.10, 131.64, 131.51, 130.48, 130.20, 129.75, 126.49, 115.78, 52.62, 35.17, 35.08, 34.75, 34.34, 33.26, 25.49, 22.62; MS (EI)  $m/z$  430 ( $\text{M}^+$ , 100), 332, 107. HRMS (EI)  $m/z$  calcd for  $\text{C}_{29}\text{H}_{34}\text{O}_3$  430.2508, found 430.2501.

**(E)-Ethyl 7-[4-[bicyclo[3.3.1]non-9-ylidene(4-hydroxyphenyl)methyl]phenyl]hept-6-enoate (21).**

Following the general procedure for Heck coupling reaction and using the triflate **11** and methyl 6-heptenoate as the reactants, 0.09 g (35%) of **21** was obtained as a colorless oil:  $^1\text{H}$  NMR (500 MHz,  $\text{CDCl}_3$ )  $\delta$  7.25 (d,  $J = 8.5$  Hz, 2H), 7.08 (d,  $J = 7.5$  Hz, 2H), 7.02 (d,  $J = 8.5$  Hz, 2H), 6.75 (d,  $J = 9.0$  Hz, 2H), 6.36 (d,  $J = 16.0$  Hz, 1H), 6.20-6.13 (m, 1H), 4.15 (q,  $J = 7.2$  Hz, 2H), 2.72 (br, 2H), 2.34 (t,  $J = 7.5$  Hz, 2H), 2.25-2.20 (m, 2H), 2.03-1.98 (m, 2H), 1.87-1.46 (m, 14H), 1.26 (t,  $J = 7.0$  Hz, 3H);  $^{13}\text{C}$  NMR (125 MHz,  $\text{CDCl}_3$ )  $\delta$  175.16, 154.96, 146.37, 143.07, 136.39, 136.30, 131.46, 130.98, 130.56, 130.47, 128.89, 126.45, 115.77, 61.41, 35.21, 35.16, 35.10, 35.07, 34.76, 33.57, 29.82, 25.43, 22.62, 15.17; MS (ESI)  $m/z$  459 ( $\text{M}^+ + 1$ ), 364 (100). HRMS (ESI)  $m/z$  calcd for  $\text{C}_{31}\text{H}_{39}\text{O}_3$  459.2899, found 459.2899.

**(E)-4-[4-[Bicyclo[3.3.1]non-9-ylidene(4-hydroxyphenyl)methyl]phenyl]but-3-enoic acid (22).** Starting from 0.11 g (0.27 mmol) of the ester **18** and using the general procedure for hydrolysis of ester, 0.09 g (86%) of acid product **22** was obtained:  $^1\text{H}$  NMR (500 MHz, methanol- $d_4$ )  $\delta$  7.28 (d,  $J = 8.0$  Hz, 2H), 7.05 (d,  $J = 8.0$  Hz, 2H), 6.94-6.92 (m, 2H), 6.70-6.67 (m, 2H), 6.46 (d,  $J = 16.0$  Hz, 2H), 6.32-6.26 (m, 1H), 3.20 (d,  $J = 7.0$  Hz, 2H), 2.69-2.66 (m, 2H), 2.10-2.03 (m, 2H), 1.85-1.77 (m, 8H), 1.60-1.57 (m, 2H);  $^{13}\text{C}$  NMR (125 MHz, methanol- $d_4$ )  $\delta$  176.03, 156.83, 145.90, 144.00, 136.29, 135.49, 133.98, 132.64, 131.36, 130.49, 126.82, 123.04, 115.75, 39.32, 35.58, 35.48, 34.79, 22.72; MS (EI)  $m/z$  388 ( $\text{M}^+$ , 100), 149, 57. HRMS (EI)  $m/z$  calcd for  $\text{C}_{26}\text{H}_{28}\text{O}_3$  388.2039, found 388.2042.

**(E)-5-[4-[bicyclo[3.3.1]non-9-ylidene(4-hydroxyphenyl)methyl]phenyl]pent-4-enoic acid (23).** Starting from 0.10 g (0.23 mmol) of the ester **19** and using the general procedure for hydrolysis of ester, 0.08 g (87%) of acid product **23** was obtained:  $^1\text{H}$  NMR (500 MHz, methanol- $d_4$ )  $\delta$  7.21 (d,  $J = 8.0$  Hz, 2H), 7.01 (d,  $J = 8.0$  Hz, 2H), 6.92 (d,  $J = 8.5$  Hz, 2H), 6.68 (d,  $J = 8.0$  Hz, 2H), 6.38 (d,  $J = 15.5$  Hz, 2H), 6.19-6.15 (m, 1H), 2.68-2.61 (m, 2H), 2.44 (m, 4H), 2.06-1.99 (m, 2H), 1.78-1.73 (m, 8H), 1.56-1.53 (m, 2H);  $^{13}\text{C}$  NMR (125 MHz, methanol- $d_4$ )  $\delta$  177.72, 156.73, 145.75, 143.58, 136.57, 135.49, 132.60, 131.88, 131.35, 130.41, 129.00, 126.63, 115.72, 35.51, 35.41, 34.77, 34.75, 29.50, 22.71; MS (EI)  $m/z$  402 ( $\text{M}^+$ ), 332 (100), 107. HRMS (EI)  $m/z$  calcd for  $\text{C}_{27}\text{H}_{30}\text{O}_3$  402.2195, found 402.2197.

**(E)-6-[4-[Bicyclo[3.3.1]non-9-ylidene(4-hydroxyphenyl)methyl]phenyl]hex-5-enoic acid (24).** Starting from 0.13 g (0.30 mmol) of the ester **20** and using the general procedure for hydrolysis of ester, 0.10 g (79%) of acid product **24** was obtained:  $^1\text{H}$  NMR (500 MHz, methanol- $d_4$ )  $\delta$  7.21 (d,  $J = 8.0$  Hz, 2H), 7.01 (d,  $J = 8.0$  Hz, 2H), 6.92 (d,  $J = 8.5$  Hz, 2H), 6.68 (d,  $J = 8.0$  Hz, 2H), 6.34 (d,  $J = 16.0$  Hz, 2H), 6.18-6.12 (m, 1H), 2.68-2.65 (m, 2H), 2.31 (t,  $J = 7.0$  Hz, 2H), 2.21 (q,  $J = 6.8$  Hz, 2H), 2.04-1.99 (m, 2H), 1.79-1.73 (m, 8H), 1.64-1.55 (m, 2H);  $^{13}\text{C}$  NMR (125 MHz, methanol- $d_4$ )  $\delta$  177.73, 156.74, 145.72, 143.46, 136.76, 135.53, 132.64, 131.80, 131.35, 130.41, 130.08, 126.58, 115.71, 35.52, 35.43, 34.78, 34.46, 33.46, 25.83, 22.72; MS (ESI)  $m/z$  417 ( $\text{M}^+ + 1$ , 100), 373. HRMS (ESI)  $m/z$  calcd for  $\text{C}_{28}\text{H}_{33}\text{O}_3$  417.2430, found 417.2420.

**(E)-7-[4-[Bicyclo[3.3.1]non-9-ylidene(4-hydroxyphenyl)methyl]phenyl]hept-6-enoic acid (25).** Starting from 0.10 g (0.22 mmol) of the ester **21** and using the general procedure for hydrolysis of ester, 0.08 g (88%) of acid product **25** was obtained:  $^1\text{H}$  NMR (500 MHz, methanol- $d_4$ )  $\delta$  7.23 (d,  $J = 8.5$  Hz, 2H), 7.02 (d,  $J = 8.0$  Hz, 2H), 6.92 (d,  $J = 9.0$  Hz, 2H), 6.68 (d,  $J = 8.5$  Hz, 2H), 6.36 (d,  $J = 15.5$  Hz, 1H), 6.22-6.17 (m, 1H), 2.69-2.66 (m, 2H), 2.29 (t,  $J = 7.5$  Hz, 2H), 2.25-2.19 (m, 2H), 2.10-2.02 (m, 2H), 2.00-1.75 (m, 8H), 1.68-1.47 (m, 6H);  $^{13}\text{C}$  NMR (125 MHz, methanol- $d_4$ )  $\delta$  177.89, 156.75, 145.68, 143.38, 136.92, 135.55, 132.68, 131.36, 130.68, 130.40, 130.12, 126.53, 115.72, 35.53, 35.44, 35.38, 34.95, 34.77, 33.75, 30.00, 25.69, 22.72; MS (ESI)  $m/z$  431 ( $\text{M}^+ + 1$ , 100), 358. HRMS (ESI)  $m/z$  calcd for  $\text{C}_{29}\text{H}_{35}\text{O}_3$  431.2586, found 431.2585.

**Methyl hydrogen 4-[bicyclo[3.3.1]non-9-ylidene(4-hydroxyphenyl)methyl]styrylphosphonate (26).** To the mixture of **11** (0.22 g, 0.49 mmol),  $\text{Pd}(\text{PPh}_3)_2\text{Cl}_2$  (0.07 mmol, 0.01 mmol) and triethylamine (1.0 mL) in DMF (3.0 mL) was added dimethyl vinylphosphonate (0.67 g, 4.9 mmol) at room temperature under  $\text{N}_2$  atmosphere. The mixture was stirred at 120  $^\circ\text{C}$  for 24 h. The reaction mixture was cooled to room temperature and was poured into 1 N HCl (30 mL) and extracted from the aqueous phase with EtOAc. The organic layer was dried with  $\text{MgSO}_4$  and evaporated under reduced pressure. 2N KOH (2.0 mL) was added

to the reaction residue dissolved in CH<sub>3</sub>OH (4.0 mL). The mixture was stirred at room temperature for 24 h, and poured into 1 N HCl (4.0 mL) and extracted from the aqueous phase with EtOAc. The organic layer was dried with MgSO<sub>4</sub> and evaporated under reduced pressure. Flash column chromatography (10% CH<sub>3</sub>OH /CH<sub>2</sub>Cl<sub>2</sub>) gave **26** (0.12 g, 57 %) as a white solid: mp 145-146 °C; <sup>1</sup>H NMR (400 MHz, DMSO-*d*<sub>6</sub>) δ 7.49 (d, *J* = 7.5 Hz, 2H), 7.25-7.17 (m, 1H), 7.06 (d, *J* = 8.0 Hz, 2H), 6.88 (d, *J* = 8.5 Hz, 2H), 6.67 (d, *J* = 8.5 Hz, 2H), 6.42-6.35 (m, 1H), 3.49 (d, *J* = 11.0 Hz, 3H), 2.61-2.54 (m, 2H), 2.00-1.94 (m, 2H), 1.72-1.71 (m, 8H), 1.53-1.51 (m, 2H); <sup>13</sup>C NMR (125 MHz, methanol-*d*<sub>4</sub>) δ 155.90, 144.65, 144.42, 133.22, 133.00, 132.69, 130.33, 130.00, 129.32, 127.34, 117.38 (d, *J* = 232.4 Hz), 114.97, 51.30 (d, *J* = 5.8 Hz), 33.80, 33.61, 33.29, 33.25, 21.20; MS (ESI) *m/z* 425 (M<sup>+</sup> + 1, 100). HRMS (ESI) *m/z* calcd for C<sub>25</sub>H<sub>30</sub>O<sub>4</sub>P 425.1882, found 425.1868.

**Ethyl 4-[4-[bicyclo[3.3.1]non-9-ylidene(4-hydroxyphenyl)methyl]phenoxy]butanoate (27)**. According to the general procedure for *O*-alkylation reaction with **7** and ethyl 4-bromobutanoate, the isolated yield of product **27** was 0.07 g (40%) as a white solid: 78-79 °C; <sup>1</sup>H NMR (400 MHz, CDCl<sub>3</sub>) δ 7.06-6.98 (m, 4H), 6.80-6.72 (m, 4H), 4.91 (s, 1H), 4.14 (q, *J* = 7.2 Hz, 2H), 3.97 (t, *J* = 6.0 Hz, 2H), 2.69 (m, 2H), 1.84-2.12-1.98 (m, 4H), 1.85-1.73 (m, 8H), 1.60-1.56 (m, 2H), 1.25 (t, *J* = 7.2 Hz, 3H); <sup>13</sup>C NMR (100 MHz, CDCl<sub>3</sub>) δ 174.46, 157.99, 154.71, 145.95, 136.93, 136.86, 131.49, 131.30, 131.08, 115.73, 114.78, 67.51, 61.48, 35.10, 34.76, 31.85, 25.66, 22.67, 15.18; MS (EI) *m/z* 434 (M<sup>+</sup>), 227, 115 (100). HRMS (EI) *m/z* calcd for C<sub>28</sub>H<sub>34</sub>O<sub>4</sub> 434.2457, found 434.2452.

**Methyl 5-[4-[bicyclo[3.3.1]non-9-ylidene(4-hydroxyphenyl)methyl]phenoxy]pentanoate (28)**. According to the general procedure for *O*-alkylation reaction with **7** and methyl 5-bromopentanoate, the isolated yield of product **28** was 0.07 g (41%) as a colorless oil: <sup>1</sup>H NMR (400 MHz, CDCl<sub>3</sub>) δ 7.06-6.99 (m, 4H), 6.80-6.72 (m, 4H), 3.94 (t, *J* = 5.6 Hz, 2H), 2.07-1.97 (m, 2H), 1.84-1.73 (m, 25H), 1.60-1.56 (m, 2H); <sup>13</sup>C NMR (100 MHz, CDCl<sub>3</sub>) δ 175.27, 158.03, 154.81, 145.82, 136.78, 131.46, 131.28, 131.11, 115.71, 114.73, 88.79, 68.12, 52.64, 35.07, 34.74, 34.67, 29.63, 22.66, 22.61; MS (EI) *m/z* 434 (M<sup>+</sup>, 100). HRMS (EI) *m/z* calcd for C<sub>28</sub>H<sub>34</sub>O<sub>4</sub> 434.2457, found 434.2451.

**Ethyl 6-[4-[bicyclo[3.3.1]non-9-ylidene(4-hydroxyphenyl)methyl]phenoxy]hexanoate (29)**. According to the general procedure for *O*-alkylation reaction with **7** and ethyl 6-bromohexanoate, the yield of compound **29** was 0.21 g (45%) as a colorless oil: <sup>1</sup>H NMR (400 MHz, CDCl<sub>3</sub>) δ 7.06-6.99 (m, 4H), 6.81-6.74 (m, 4H), 5.90 (br, 1H), 4.15 (q, *J* = 7.1 Hz, 2H), 3.93 (t, *J* = 6.4 Hz, 2H), 2.71 (br, 2H), 2.35 (t, *J* = 7.4 Hz, 2H), 2.08-1.97 (m, 2H), 1.86-1.67 (m, 12H), 1.60-1.46 (m, 4H), 1.26 (t, *J* = 7.0 Hz, 3H); <sup>13</sup>C NMR (100 MHz, CDCl<sub>3</sub>) δ 175.18, 158.09, 154.96, 145.70, 136.74, 136.62, 131.41, 131.26, 131.18, 115.71, 114.73, 68.42, 61.45,



35.24, 35.04, 34.72, 29.90, 26.60, 25.64, 22.63, 15.14; MS (EI)  $m/z$  462 ( $M^+$ , 100). HRMS (EI)  $m/z$  calcd for  $C_{30}H_{38}O_4$  462.2770, found 462.2766.

**Ethyl 7-[4-[bicyclo[3.3.1]non-9-ylidene(4-hydroxyphenyl)methyl]phenoxy]heptanoate (30).** According to the general procedure for *O*-alkylation reaction with **7** and ethyl 7-bromoheptanoate, the isolated yield of product **30** was 0.18 g (38%) as a colorless oil:  $^1H$  NMR (500 MHz,  $CDCl_3$ )  $\delta$  7.06 (d,  $J = 8.5$  Hz, 2H), 7.02 (d,  $J = 9.0$  Hz, 2H), 6.81 (d,  $J = 8.5$  Hz, 2H), 6.76 (d,  $J = 8.5$  Hz, 2H), 5.94 (s, 1H), 4.16 (q,  $J = 7.0$  Hz, 2H), 3.93 (t,  $J = 6.5$  Hz, 2H), 2.73 (br, 2H), 2.34 (t,  $J = 7.5$  Hz, 2H), 2.08-1.99 (m, 2H), 1.87-1.75 (m, 10H), 1.71-1.58 (m, 4H), 1.51-1.37 (m, 4H), 1.27 (t,  $J = 7.2$  Hz, 3H);  $^{13}C$  NMR (125 MHz,  $CDCl_3$ )  $\delta$  175.32, 158.14, 154.95, 145.67, 136.70, 136.63, 131.40, 131.24, 131.20, 115.71, 114.74, 68.60, 61.42, 35.25, 35.04, 34.71, 30.04, 29.76, 26.67, 25.79, 22.62, 15.14; MS (EI)  $m/z$  476 ( $M^+$ ), 446 (100), 255. HRMS (EI)  $m/z$  calcd for  $C_{31}H_{40}O_4$  476.2927, found 476.2918.

**Ethyl 11-[4-[bicyclo[3.3.1]non-9-ylidene(4-hydroxyphenyl)methyl]phenoxy]nudecanoate (31).** According to the general procedure for *O*-alkylation reaction with **7** and ethyl 11-bromoundecanoate, the isolated yield of product **31** was 0.24 g (36%) as a colorless oil:  $^1H$  NMR (500 MHz,  $CDCl_3$ )  $\delta$  7.08-7.00 (m, 4H), 6.84-6.76 (m, 4H), 4.16 (q,  $J = 7.2$  Hz, 2H), 3.94 (t,  $J = 6.5$  Hz, 2H), 2.73 (br, 2H), 2.33 (t,  $J = 7.7$  Hz, 2H), 2.08-1.99 (m, 2H), 1.87-1.58 9 (m 14H), 1.48-1.42 (m, 2H), 1.38-1.26 (m, 13H);  $^{13}C$  NMR (125 MHz,  $CDCl_3$ )  $\delta$  175.51, 158.71, 155.04, 145.56, 136.67, 136.53, 131.36, 131.27, 131.22, 115.72, 114.75, 68.79, 61.39, 35.35, 35.04, 35.01, 34.70, 30.38, 30.26, 30.22, 30.11, 30.00, 26.97, 25.87, 22.62, 15.12; MS (EI)  $m/z$  532 ( $M^+$ ), 446 (100), 223. HRMS (EI)  $m/z$  calcd for  $C_{35}H_{48}O_4$  532.3553, found 532.3558.

**4-[4-[Bicyclo[3.3.1]non-9-ylidene(4-hydroxyphenyl)methyl]phenoxy]butanoic acid (32).** Starting from 0.15 g (0.34 mmol) of the ester **27** and using the general procedure for hydrolysis of ester, 0.14 g (97%) of acid product **32** was obtained:  $^1H$  NMR (500 MHz, methanol- $d_4$ )  $\delta$  7.26 (s 1H), 7.05-6.99 (m, 4H), 6.80-6.71 (m, 4H), 3.98 (t,  $J = 6.0$  Hz, 2H), 2.69 (br, 2H), 2.58 (t,  $J = 7.5$  Hz, 2H), 2.12-1.98 (m, 4H), 1.84-1.77 (m, 8H), 1.60-1.54 (m, 2H);  $^{13}C$  NMR (125 MHz, methanol- $d_4$ )  $\delta$  177.16, 158.67, 156.69, 145.12, 137.26, 135.92, 132.49, 131.29, 131.27, 115.66, 114.96, 67.98, 35.48, 35.45, 34.77, 31.52, 25.94, 22.75; MS (EI)  $m/z$  406 ( $M^+$ ), 285, 141 (100). HRMS (EI)  $m/z$  calcd for  $C_{26}H_{30}O_4$  406.2144, found 406.2143.

**5-[4-[Bicyclo[3.3.1]non-9-ylidene(4-hydroxyphenyl)methyl]phenoxy]pentanoic acid (33).** Starting from 0.12 g (0.28 mmol) of the ester **28** and using the general procedure for hydrolysis of ester, 0.11 g (92%) of acid product **33** was obtained:  $^1H$  NMR (400 MHz, methanol- $d_4$ )  $\delta$  7.00-6.90 (m, 4H), 6.78-6.66 (m, 4H), 3.91 (t,  $J = 5.2$  Hz, 2H), 2.66 (br, 2H), 2.35 (br, 2H), 2.08-1.98 (m, 2H), 1.84-1.72 (m, 12H), 1.58-1.54 (m, 2H);  $^{13}C$  NMR (100 MHz, methanol- $d_4$ )  $\delta$  177.43, 158.70, 156.62, 145.07, 137.07, 135.91, 132.42, 131.31,

131.25, 115.65, 114.89, 68.50, 35.41, 30.77, 29.85, 22.84, 22.76; MS (EI)  $m/z$  420 ( $M^+$ , 100), 285, 107. HRMS (EI)  $m/z$  calcd for  $C_{27}H_{32}O_4$  420.2301, found 420.2301.

**6-[4-[Bicyclo[3.3.1]non-9-ylidene(4-hydroxyphenyl)methyl]phenoxy]hexanoic acid (34).** Starting from 0.09 g (0.19 mmol) of the ester **29** and using the general procedure for hydrolysis of ester, 0.08 g (98%) of acid product **34** was obtained:  $^1H$  NMR (400 MHz, methanol- $d_4$ )  $\delta$  6.98 (d,  $J = 6.8$  Hz, 2H), 6.91 (d,  $J = 6.8$  Hz, 2H), 6.76 (d,  $J = 6.8$  Hz, 2H), 6.67 (d,  $J = 6.8$  Hz, 2H), 3.89 (t,  $J = 5.0$  Hz, 2H), 2.66 (br, 2H), 2.29 (t,  $J = 5.8$  Hz, 2H), 2.07-1.98 (m, 2H), 1.80-1.44 (m, 16H);  $^{13}C$  NMR (100 MHz, methanol- $d_4$ )  $\delta$  177.73, 158.80, 156.67, 145.07, 137.05, 135.93, 132.48, 131.34, 131.27, 115.66, 114.90, 68.70, 35.41, 34.90, 34.76, 30.13, 26.76, 25.85, 22.76; MS (ESI)  $m/z$  435 ( $M^+ + 1$ , 100). HRMS (ESI)  $m/z$  calcd for  $C_{28}H_{35}O_4$  435.2535, found 435.2556.

**7-[4-[Bicyclo[3.3.1]non-9-ylidene(4-hydroxyphenyl)methyl]phenoxy]heptanoic acid (35).** Starting from 0.11 g (0.23 mmol) of the ester **30** and using the general procedure for hydrolysis of ester, 0.10 g (96%) of acid product **35** was obtained:  $^1H$  NMR (500 MHz, methanol- $d_4$ )  $\delta$  6.98 (d,  $J = 8.5$  Hz, 2H), 6.91 (d,  $J = 8.5$  Hz, 2H), 6.77 (d,  $J = 8.5$  Hz, 2H), 6.67 (d,  $J = 8.5$  Hz, 2H), 4.89 (br, 1H), 3.90 (t,  $J = 6.5$  Hz, 2H), 2.67-2.66 (m, 2H), 2.80 (t,  $J = 7.2$  Hz, 2H), 2.08 -1.99 (m, 2H), 1.84-1.70 (m, 10H), 1.64-1.53 (m, 4H), 1.49-1.35 (m, 4H);  $^{13}C$  NMR (125 MHz, methanol- $d_4$ )  $\delta$  177.65, 158.82, 156.64, 145.06, 137.04, 135.94, 132.49, 131.31, 131.24, 115.65, 114.92, 68.84, 35.45, 35.43, 34.87, 34.77, 30.28, 29.96, 26.88, 26.01, 22.75; MS (EI)  $m/z$  448 ( $M^+$ , 100), 284, 141. HRMS (EI)  $m/z$  calcd for  $C_{29}H_{36}O_4$  448.2614, found 448.2619.

**11-[4-[bicyclo[3.3.1]non-9-ylidene(4-hydroxyphenyl)methyl]phenoxy]nudecanoic acid (36).** Starting from 0.15 g (0.28 mmol) of the ester **31** and using the general procedure for hydrolysis of ester, 0.14 g (99%) of acid product **36** was obtained:  $^1H$  NMR (500 MHz, methanol- $d_4$ )  $\delta$  6.99-6.90 (m, 4H), 6.76-6.66 (m, 4H), 3.87 (t,  $J = 6.5$  Hz, 2H), 2.66 (br, 2H), 2.25 (t,  $J = 7.5$  Hz, 2H), 2.05 -1.98 (m, 2H), 1.78-1.68 (m, 10H), 1.57-1.56 (m, 4H), 1.42-1.29 (m, 12H);  $^{13}C$  NMR (125 MHz, methanol- $d_4$ )  $\delta$  177.87, 158.80, 156.62, 145.02, 136.98, 135.92, 132.48, 131.31, 131.24, 115.66, 114.91, 68.92, 35.42, 35.06, 34.77, 30.66, 30.54, 30.49, 30.46, 30.41, 30.24, 27.17, 26.12, 22.76; MS (EI)  $m/z$  504 ( $M^+$ ), 446 (100), 141. HRMS (EI)  $m/z$  calcd for  $C_{33}H_{44}O_4$  504.3240, found 504.3234.

**(4-tert-Butyldimethylsilyloxyphenyl) (4-hydroxyphenyl) methylenecyclohexane (37).** To the mixture of **8** (2.17 g, 7.74 mmol) and imidazole (0.74 g, 10.84 mmol) in THF (50 mL) was added TBDMSCl (1.63 g, 10.84 mmol) at room temperature. The mixture was stirred at room temperature for 24 h. The reaction mixture was poured into water (200 mL) and extracted from the aqueous phase with EtOAc (200 mL). The organic layer was dried with  $MgSO_4$  and evaporated under reduced pressure. The residue was purified by

flash column chromatography (20% EtOAc/hexane) to provide **37** (1.22 g, 40%):  $^1\text{H}$  NMR (400 MHz,  $\text{CDCl}_3$ )  $\delta$  6.99-6.97 (m, 4H), 6.77-6.74 (m, 4H), 6.40 (br, 1H), 2.27-2.26 (m, 4H), 1.61 (br, 6H), 1.00 (s, 9H), 0.22 (s, 6H);  $^{13}\text{C}$  NMR (125 MHz,  $\text{CDCl}_3$ )  $\delta$  153.90, 153.65, 138.11, 136.44, 135.72, 133.56, 131.01, 130.83, 119.22, 114.71, 32.43, 28.62, 25.61, 18.08, -4.47; MS (EI)  $m/z$  394 ( $\text{M}^+$ , 100), 337, 187. HRMS (EI)  $m/z$  calcd for  $\text{C}_{25}\text{H}_{34}\text{O}_2\text{Si}$  394.2328, found 394.2329.

**(4-Hydroxyphenyl) (4-trifluoromethanesulfonylphenyl) methylenecyclohexane (38)**. To the mixture of **37** (0.33 g, 0.84 mmol) and triflic anhydride (0.18 mL, 1.09 mmol) in  $\text{CH}_2\text{Cl}_2$  (50 mL) was added triethylamine (0.15 mL, 1.09 mmol) at 0 °C. The mixture was stirred at room temperature for 8 h. The reaction mixture was poured into water (200 mL) and extracted from the aqueous phase with EtOAc. The organic layer was dried with  $\text{MgSO}_4$  and evaporated under reduced pressure. The residue was purified by flash column chromatography (20% EtOAc/hexane) to provide **38** (0.28 g, 82%) as a colorless oil:  $^1\text{H}$  NMR (500 MHz,  $\text{CDCl}_3$ )  $\delta$  7.17-6.95 (m, 6H), 6.77-6.76 (m, 2H), 4.98 (s, 1H), 2.26-2.19 (m, 4H), 1.61-1.59 (m, 6H);  $^{13}\text{C}$  NMR (125 MHz,  $\text{CDCl}_3$ )  $\delta$  154.02, 147.90, 143.67, 140.75, 134.85, 132.04, 131.88, 131.06, 120.90, 118.80 (q,  $J = 318.9$  Hz), 114.82, 32.43, 28.46, 26.54; MS (EI)  $m/z$  412 ( $\text{M}^+$ , 100), 279, 211. HRMS (EI)  $m/z$  calcd for  $\text{C}_{20}\text{H}_{19}\text{O}_4\text{SF}_3$  412.0956, found 412.0960.

**(E)-ethyl 3-[4-[cyclohexylidene(4-hydroxyphenyl)methyl]phenyl]acrylate (39)**. Following the general procedure for Heck coupling reaction and using the triflate **38** and methyl acrylate as the reactants, 0.12 g (65%) of **39** was obtained as a colorless oil:  $^1\text{H}$  NMR (400 MHz,  $\text{CDCl}_3$ )  $\delta$  7.66 (d,  $J = 16.0$  Hz, 1H), 7.40 (d,  $J = 8.4$  Hz, 2H), 7.12 (d,  $J = 8.0$  Hz, 2H), 6.97-6.94 (m, 2H), 6.79-6.76 (m, 2H), 6.39 (d,  $J = 16.0$  Hz, 1H), 4.26 (q,  $J = 7.1$  Hz, 2H), 2.27-2.24 (m, 4H), 1.60 (m, 6H), 1.33 (t,  $J = 7.2$  Hz, 3H);  $^{13}\text{C}$  NMR (100 MHz,  $\text{CDCl}_3$ )  $\delta$  167.56, 154.39, 145.79, 144.82, 139.82, 134.76, 133.34, 131.96, 131.06, 130.36, 127.67, 117.16, 114.87, 60.61, 32.47, 28.61, 26.70, 14.24; MS (EI)  $m/z$  362 ( $\text{M}^+$ , 100), 333, 101. HRMS (EI)  $m/z$  calcd for  $\text{C}_{24}\text{H}_{26}\text{O}_3$  362.1882, found 362.1879.

**Ethyl 6-[4-[cyclohexylidene(4-hydroxyphenyl)methyl]phenoxy]hexanoate (40)**. According to the general procedure for *O*-alkylation reaction with **8** and ethyl 6-bromohexanoate, the isolated yield of product **40** was 0.18 g (34%) as a colorless oil:  $^1\text{H}$  NMR (500 MHz,  $\text{CDCl}_3$ )  $\delta$  7.02-6.95 (m, 4H), 6.80-6.73 (m, 4H), 5.85 (s, 1H), 4.15 (q,  $J = 7.2$  Hz, 2H), 3.93 (t,  $J = 6.2$  Hz, 2H), 2.35 (t,  $J = 7.5$  Hz, 2H), 2.25-2.24 (m, 4H), 1.99-1.67 (m, 4H), 1.59-1.57 (m, 6H), 1.53-1.46 (m, 2H), 1.26 (t,  $J = 7.2$  Hz, 3H);  $^{13}\text{C}$  NMR (125 MHz,  $\text{CDCl}_3$ )  $\delta$  174.15, 157.14, 153.97, 138.11, 135.77, 135.70, 133.43, 130.98, 130.81, 114.63, 113.67, 67.46, 60.44, 34.25, 32.42, 28.90, 28.62, 26.81, 25.60, 24.64, 14.15; MS (EI)  $m/z$  422 ( $\text{M}^+$ , 100), 279, 143. HRMS (EI)  $m/z$  calcd for  $\text{C}_{27}\text{H}_{34}\text{O}_4$  422.2457, found 422.2466.

**Methyl 2-[4-[cyclohexylidene(4-*tert*-butyldimethylsilyloxyphenyl)methyl]phenoxy]acetate (41).**

According to the general procedure for *O*-alkylation reaction with **37** and methyl 2-bromoacetate, the isolated yield of product **41** was 0.26 g (77%) as a colorless oil:  $^1\text{H}$  NMR (400 MHz,  $\text{CDCl}_3$ )  $\delta$  7.03 (d,  $J = 8.8$  Hz, 2H), 6.95 (d,  $J = 8.4$  Hz, 2H), 6.81 (d,  $J = 8.8$  Hz, 2H), 6.74 (d,  $J = 8.4$  Hz, 2H), 4.62 (s, 2H), 3.81 (s, 3H), 2.22 (m, 4H), 1.59 (m, 6H), 0.98 (s, 9H), 0.20 (s, 6H);  $^{13}\text{C}$  NMR (100 MHz,  $\text{CDCl}_3$ )  $\delta$  169.50, 155.95, 153.75, 138.44, 136.98, 136.14, 133.33, 130.95, 130.77, 119.20, 113.86, 65.29, 52.18, 32.41, 28.62, 26.80, 25.61, 18.09, -4.45; MS (EI)  $m/z$  466 ( $\text{M}^+$ , 100), 446, 275. HRMS (EI)  $m/z$  calcd for  $\text{C}_{28}\text{H}_{38}\text{O}_4\text{Si}$  466.2539, found 466.2544.

**(E)-3-[4-[cyclohexylidene(4-hydroxyphenyl)methyl]phenyl]acrylic acid (42).** Starting from 0.11 g (0.30 mmol) of the ester **39** and using the general procedure for hydrolysis of ester, 0.09 g (85%) of acid product **42** was obtained:  $^1\text{H}$  NMR (500 MHz, methanol- $d_4$ )  $\delta$  7.63 (d,  $J = 15.6$  Hz, 1H), 7.48 (d,  $J = 8.4$  Hz, 2H), 7.10 (d,  $J = 8.0$  Hz, 2H), 6.90-6.86 (m, 2H), 6.71-6.67 (m, 2H), 6.43 (d,  $J = 16.0$  Hz, 1H), 2.25-2.20 (m, 4H), 1.59 (m, 6H);  $^{13}\text{C}$  NMR (125 MHz, methanol- $d_4$ )  $\delta$  170.54, 157.02, 147.26, 146.21, 140.34, 135.35, 135.11, 133.54, 131.94, 131.46, 128.80, 118.64, 115.76, 33.51, 29.73, 27.87; MS (EI)  $m/z$  334 ( $\text{M}^+$ , 100), 253, 150. HRMS (EI)  $m/z$  calcd for  $\text{C}_{22}\text{H}_{22}\text{O}_3$  334.1569, found 334.1573.

**6-[4-[cyclohexylidene(4-hydroxyphenyl)methyl]phenoxy]hexanoic acid (43).** Starting from 0.16 g (0.38 mmol) of the ester **40** and using the general procedure for hydrolysis of ester, 0.14 g (93%) of acid product **43** was obtained:  $^1\text{H}$  NMR (500 MHz, methanol- $d_4$ )  $\delta$  6.94-6.85 (m, 4H), 6.77-6.66 (m, 4H), 3.90 (t,  $J = 6.2$  Hz, 2H), 2.30 (t,  $J = 7.5$  Hz, 2H), 2.22-2.19 (m, 4H), 1.77-1.46 (m, 12H);  $^{13}\text{C}$  NMR (125 MHz, methanol- $d_4$ )  $\delta$  177.68, 158.77, 156.64, 138.58, 137.12, 136.00, 135.52, 131.86, 131.80, 115.55, 114.80, 68.71, 34.91, 33.47, 30.12, 29.75, 27.97, 26.75, 25.85; MS (ESI)  $m/z$  395 ( $\text{M}^+ + 1$ ), 228 (100), 115. HRMS (ESI)  $m/z$  calcd for  $\text{C}_{25}\text{H}_{31}\text{O}_4$  395.2222, found 395.2216.

**2-[4-[Cyclohexylidene(4-hydroxyphenyl)methyl]phenoxy]acetic acid (44).** Starting from 0.20 g (0.43 mmol) of the ester **41** and using the general procedure for hydrolysis of ester, 0.14 g (95%) of acid product **44** was obtained:  $^1\text{H}$  NMR (500 MHz, methanol- $d_4$ )  $\delta$  6.97 (d,  $J = 8.0$  Hz, 2H), 6.84 (d,  $J = 8.5$  Hz, 2H), 6.81 (d,  $J = 8.0$  Hz, 2H), 6.67 (d,  $J = 8.0$  Hz, 2H), 4.57 (s, 2H), 2.20 (m, 4H), 1.55 (m, 6H);  $^{13}\text{C}$  NMR (125 MHz, methanol- $d_4$ )  $\delta$  173.62, 157.72, 156.67, 138.87, 138.02, 135.84, 135.30, 131.83, 115.58, 114.98, 66.25, 33.42, 29.71, 27.93; MS (ESI)  $m/z$  339 ( $\text{M}^+ + 1$ ), 250 (100). HRMS (ESI)  $m/z$  calcd for  $\text{C}_{21}\text{H}_{23}\text{O}_4$  339.1596, found 339.1602.

**Ethyl 6-[4-[bicyclo[3.3.1]non-9-ylidene(phenyl)methyl]phenoxy]hexanoate (45).** According to the general procedure for *O*-alkylation reaction with **9** and ethyl 6-bromohexanoate, the yield of compound **29**

was 0.34 g (99%) as a colorless oil:  $^1\text{H}$  NMR (500 MHz,  $\text{CDCl}_3$ )  $\delta$  7.30-7.26 (m, 2H), 7.21-7.17 (m, 3H), 7.09 (d,  $J = 8.5$  Hz, 2H), 6.82 (d,  $J = 8.5$  Hz, 2H), 4.15 (q,  $J = 7.2$  Hz, 2H), 3.95 (t,  $J = 6.2$  Hz, 2H), 2.76-2.70 (m, 2H), 2.35 (t,  $J = 7.5$  Hz, 2H), 2.10-2.01 (m, 2H), 1.90-1.49 (m, 16H), 1.28 (t,  $J = 7.0$  Hz, 3H);  $^{13}\text{C}$  NMR (125 MHz,  $\text{CDCl}_3$ )  $\delta$  174.54, 158.24, 146.16, 144.32, 136.31, 131.76, 131.24, 130.20, 128.82, 126.78, 114.74, 68.35, 61.13, 35.17, 35.09, 34.99, 34.72, 29.93, 26.61, 25.64, 22.62, 15.17; MS (EI)  $m/z$  446( $\text{M}^+$ , 100), 303, 143. HRMS (EI)  $m/z$  calcd for  $\text{C}_{30}\text{H}_{38}\text{O}_3$  446.2821, found 446.2820.

**6-[4-[bicyclo[3.3.1]non-9-ylidene(phenyl)methyl]phenoxy]hexanoic acid (46).** Starting from 0.30 g (0.67 mmol) of the ester **45** and using the general procedure for hydrolysis of ester, 0.27 g (97%) of acid product **46** was obtained:  $^1\text{H}$  NMR (500 MHz, methanol- $d_4$ )  $\delta$  7.23-7.20 (m, 2H), 7.14-7.09 (m, 3H), 7.00 (d,  $J = 9.0$  Hz, 2H), 6.77 (d,  $J = 9.0$  Hz, 2H), 3.89 (t,  $J = 6.5$  Hz, 2H), 2.68-2.60 (m, 2H), 2.29 (t,  $J = 7.2$  Hz, 2H), 2.08-1.99 (m, 2H), 1.85-1.44 (m, 16H);  $^{13}\text{C}$  NMR (125 MHz, methanol- $d_4$ )  $\delta$  177.68, 158.90, 145.89, 144.63, 136.52, 132.74, 131.26, 130.22, 128.96, 127.03, 115.01, 68.74, 35.51, 35.38, 34.95, 34.76, 30.13, 26.78, 25.87, 22.72 ; MS (EI)  $m/z$  418 ( $\text{M}^+$ , 100), 221, 69. HRMS (EI)  $m/z$  calcd for  $\text{C}_{28}\text{H}_{34}\text{O}_3$  418.2508, found 418.2507.

**II.  $^1\text{H}$  and  $^{13}\text{C}$  NMR Spectra****9-[(4-hydroxyphenyl)(phenyl)methylene]bicyclo[3.3.1]-nonane (9).** $^1\text{H}$  NMR (400 MHz,  $\text{CDCl}_3$ )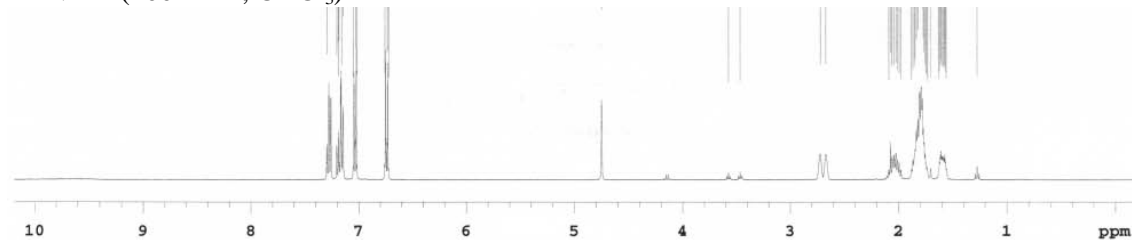 $^{13}\text{C}$  NMR (100 MHz,  $\text{CDCl}_3$ )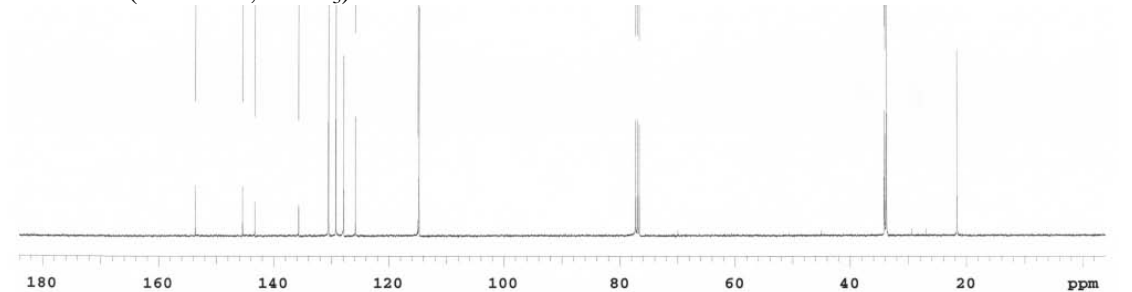**9-[(4-*tert*-Butyldimethylsilyloxyphenyl)(4-hydroxyphenyl)methylene]bicyclo[3.3.1]-nonane (10).** $^1\text{H}$  NMR (400 MHz,  $\text{CDCl}_3$ )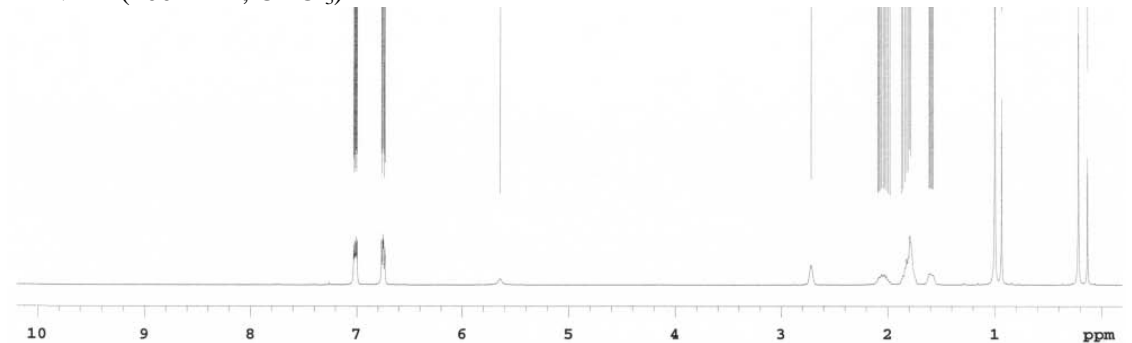 $^{13}\text{C}$  NMR (100 MHz,  $\text{CDCl}_3$ )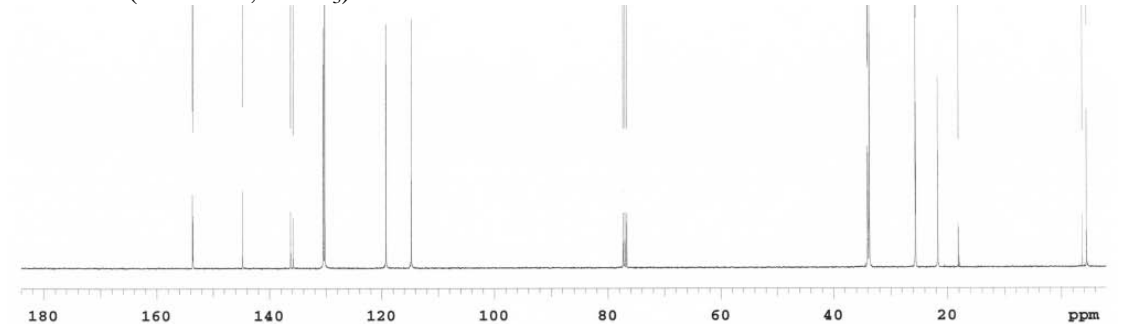

**9-[(4-Trifluoromethanesulfonylphenyl) (4-hydroxyphenyl) methylene]bicyclo[3.3.1]-nonane (11).**<sup>1</sup>H NMR (500 MHz, CDCl<sub>3</sub>)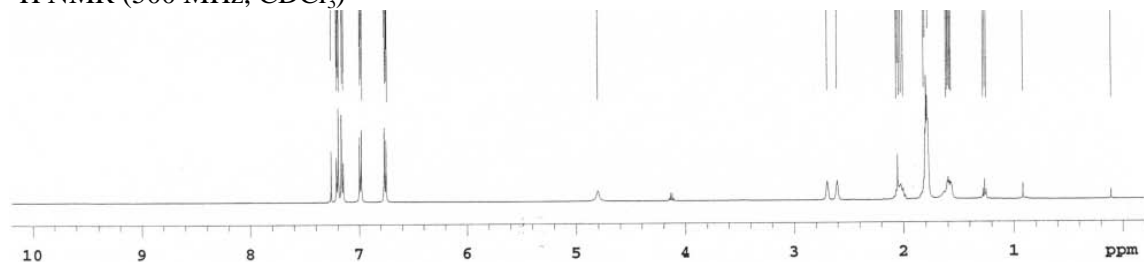<sup>13</sup>C NMR (125 MHz, CDCl<sub>3</sub>)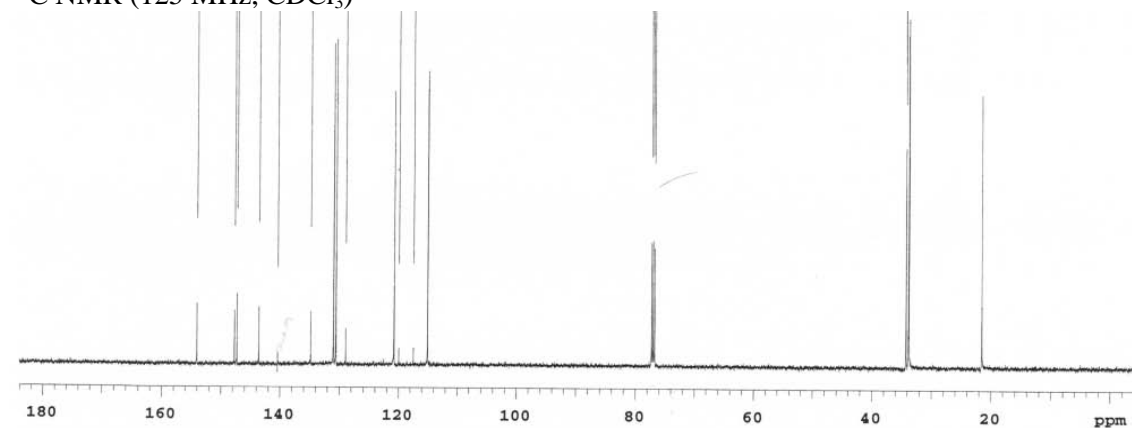**2,2'-[4,4'-(Bicyclo[3.3.1]non-9-ylidenemethylene)bis(4,1-phenylene)]bis(oxy)diacetic acid (12).**<sup>1</sup>H NMR (400 MHz, DMSO-*d*<sub>4</sub>)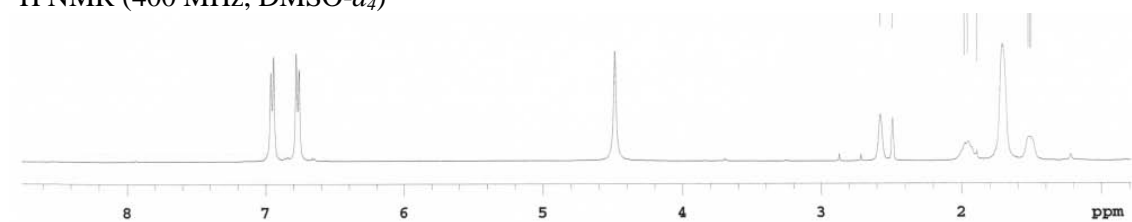<sup>13</sup>C NMR (100 MHz, DMSO-*d*<sub>4</sub>)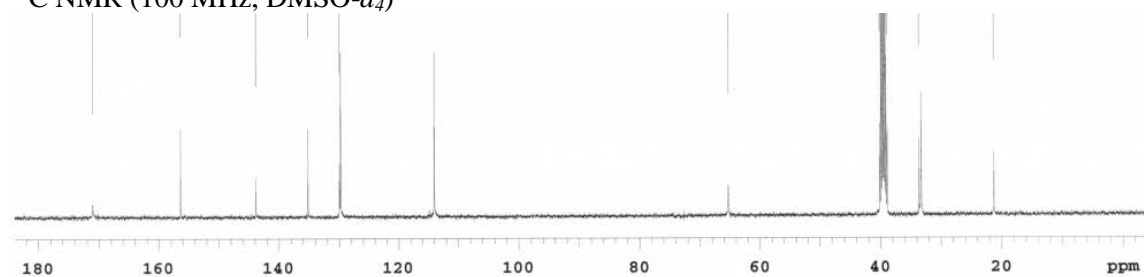

**Methyl 2-[4-[bicyclo[3.3.1]non-9-ylidene[4-(*tert*-butyldimethylsilyloxyphenyl)methyl]phenoxy]acetate (14).**<sup>1</sup>H NMR (400 MHz, CDCl<sub>3</sub>)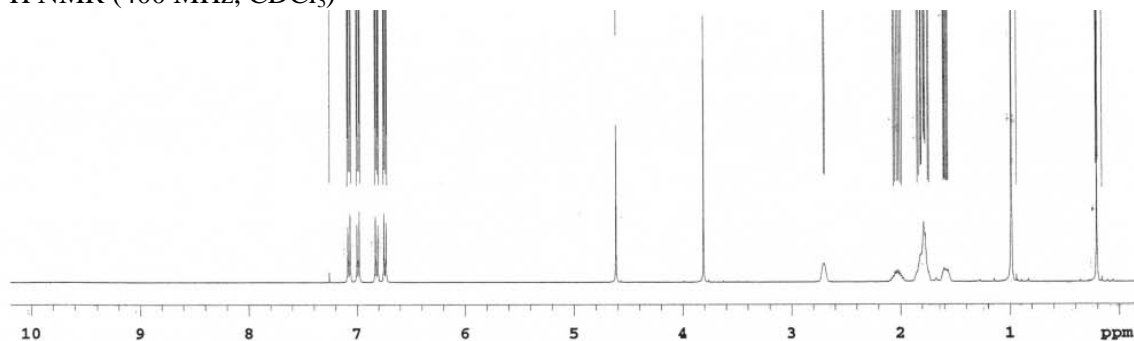<sup>13</sup>C NMR (100 MHz, CDCl<sub>3</sub>)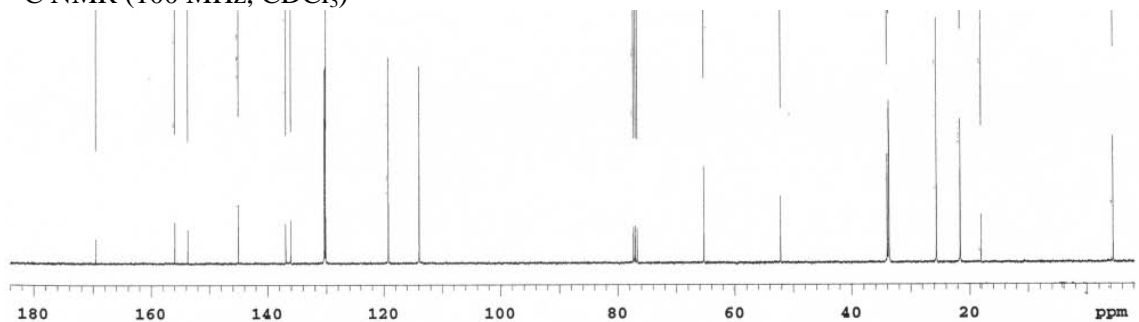**2-[4-[Bicyclo[3.3.1]non-9-ylidene(4-hydroxyphenyl)methyl]phenoxy]acetic acid (15).**<sup>1</sup>H NMR (400 MHz, methanol-*d*<sub>4</sub>)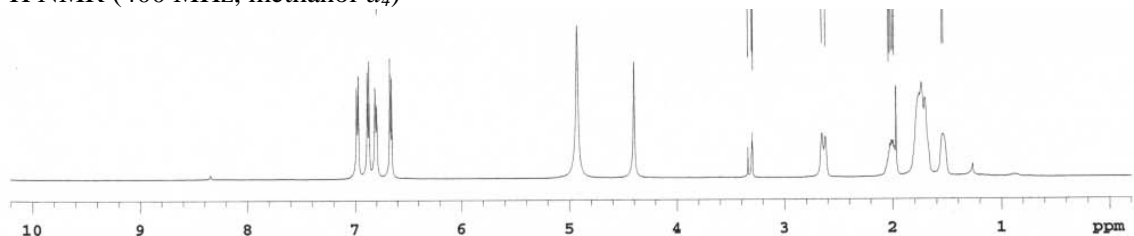<sup>13</sup>C NMR (100 MHz, methanol-*d*<sub>4</sub>)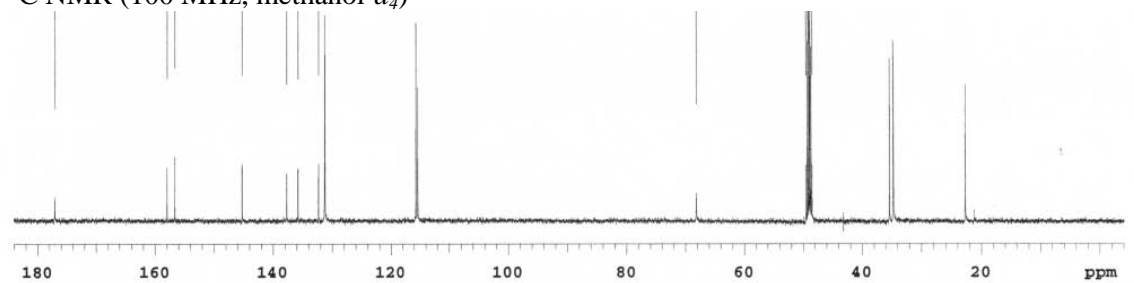



**(E)-Ethyl 3-[4-[bicyclo[3.3.1]non-9-ylidene(4-hydroxyphenyl)methyl]phenyl]acrylate (16).**<sup>1</sup>H NMR (400 MHz, CDCl<sub>3</sub>)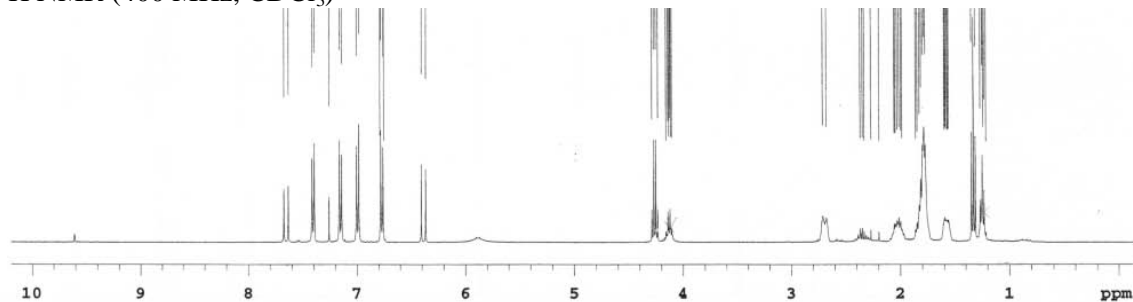<sup>13</sup>C NMR (100 MHz, CDCl<sub>3</sub>)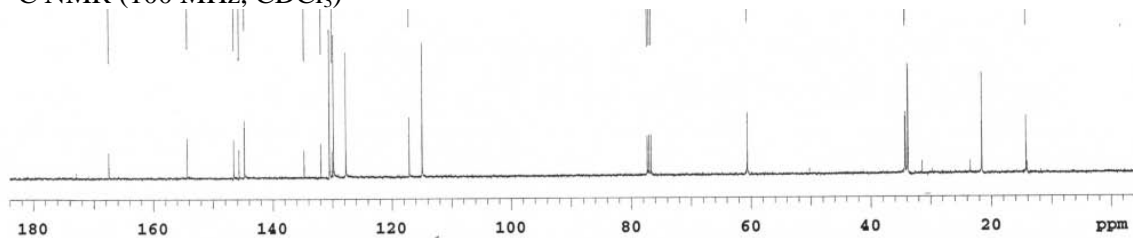**(E)-3-[4-[bicyclo[3.3.1]non-9-ylidene(4-hydroxyphenyl)methyl]phenyl]acrylic acid (17).**<sup>1</sup>H NMR (400 MHz, methanol-*d*<sub>4</sub>)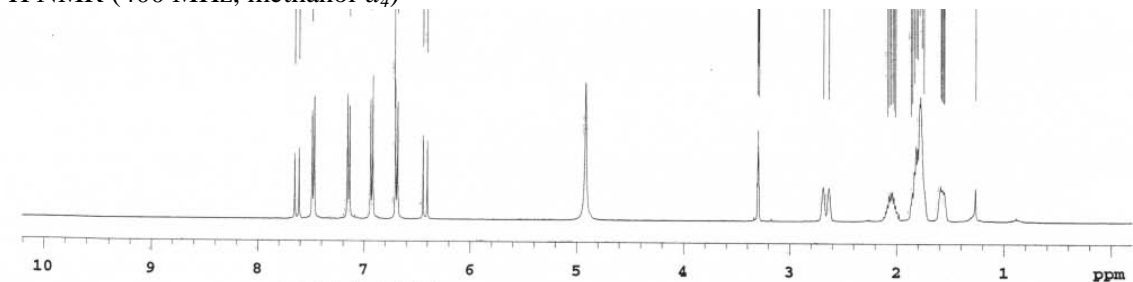<sup>13</sup>C NMR (100 MHz, methanol-*d*<sub>4</sub>)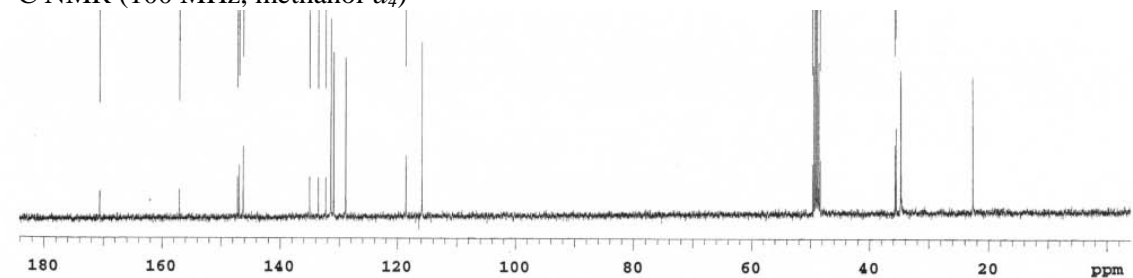

**(E)-Methyl 4-[4-[bicyclo[3.3.1]non-9-ylidene(4-hydroxyphenyl)methyl]phenyl]but-3-enoate (18).**<sup>1</sup>H NMR (400 MHz, CDCl<sub>3</sub>)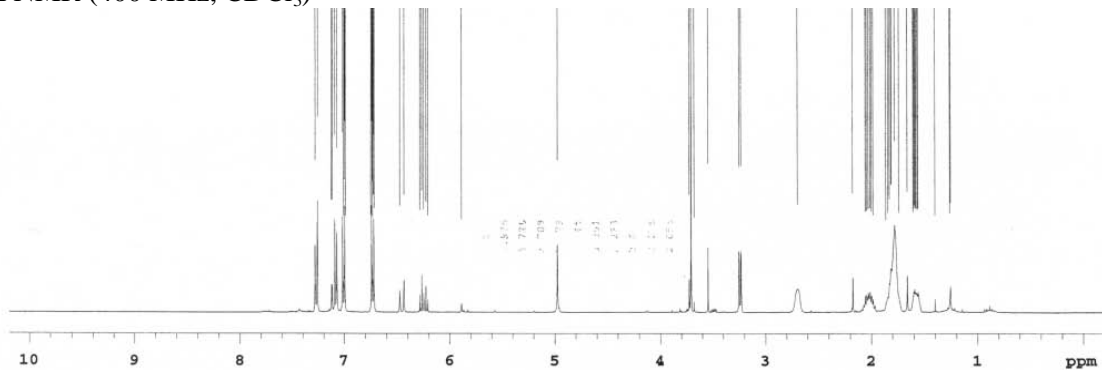<sup>13</sup>C NMR (100 MHz, CDCl<sub>3</sub>)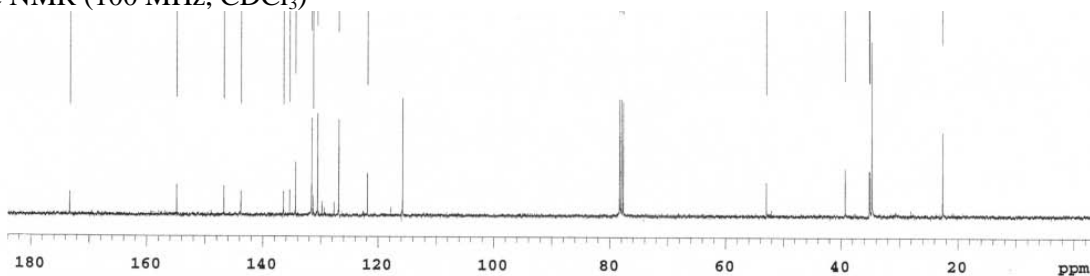**(E)-Ethyl 5-[4-[bicyclo[3.3.1]non-9-ylidene(4-hydroxyphenyl)methyl]phenyl]pent-4-enoate (19).**<sup>1</sup>H NMR (500 MHz, CDCl<sub>3</sub>)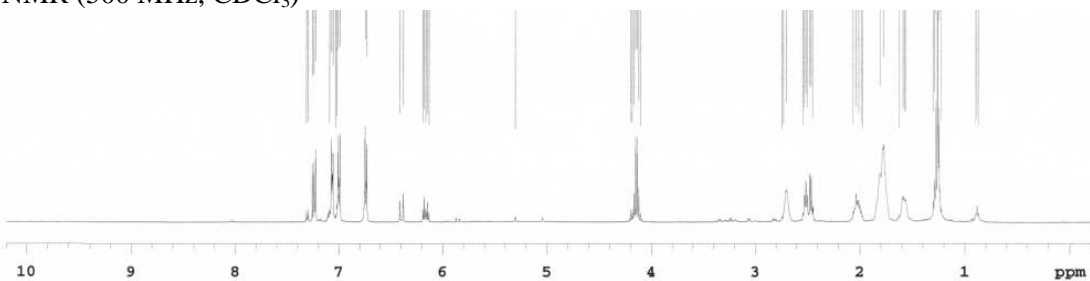<sup>13</sup>C NMR (125 MHz, CDCl<sub>3</sub>)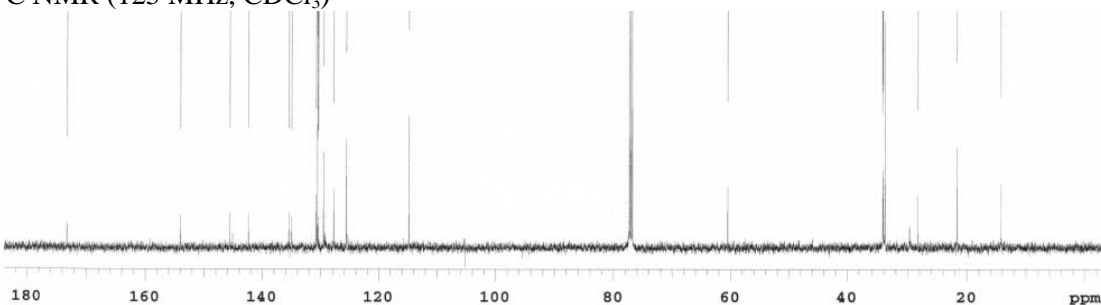

**(E)-Methyl 6-[4-[bicyclo[3.3.1]non-9-ylidene(4-hydroxyphenyl)methyl]phenyl]hex-5-enoate (20).**<sup>1</sup>H NMR (400 MHz, CDCl<sub>3</sub>)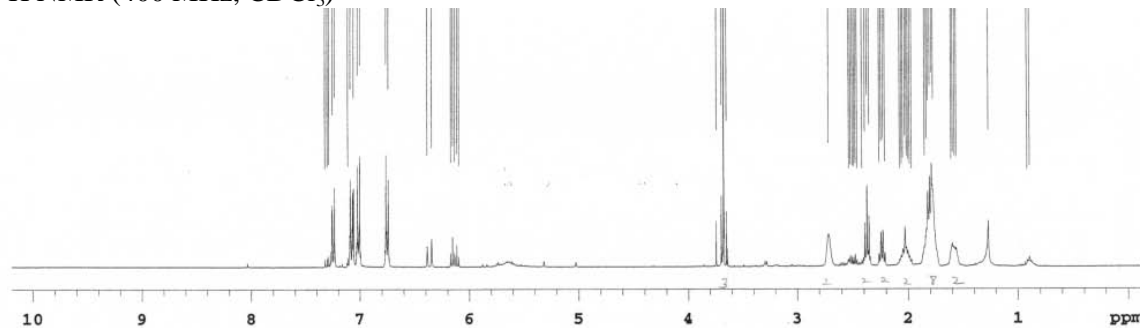<sup>13</sup>C NMR (100 MHz, CDCl<sub>3</sub>)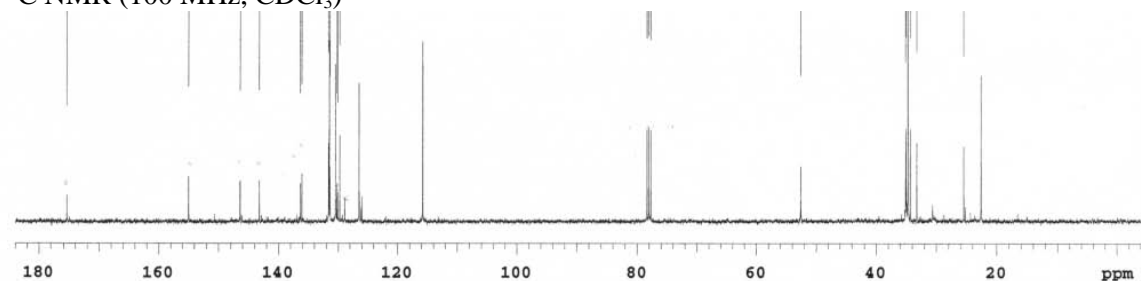**(E)-Ethyl 7-[4-[bicyclo[3.3.1]non-9-ylidene(4-hydroxyphenyl)methyl]phenyl]hept-6-enoate (21).**<sup>1</sup>H NMR (500 MHz, CDCl<sub>3</sub>)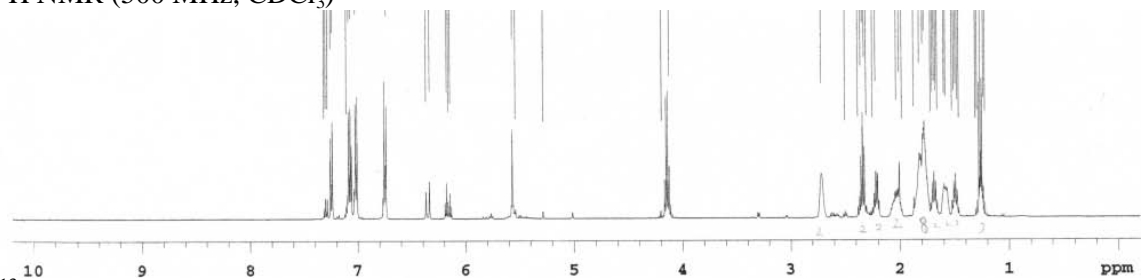<sup>13</sup>C NMR (125 MHz, CDCl<sub>3</sub>)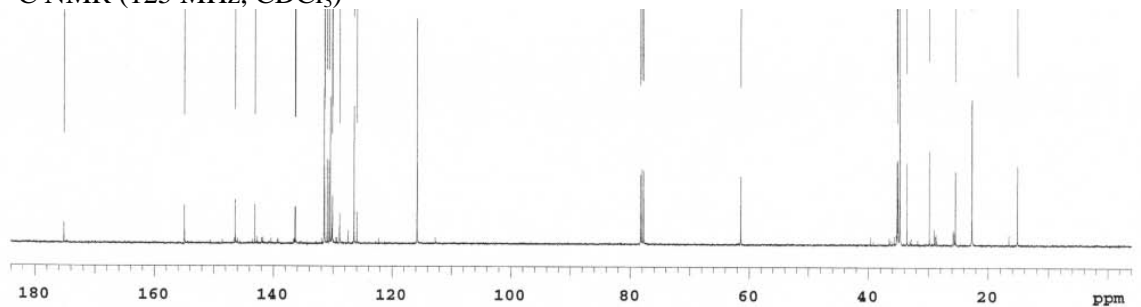

**(E)-4-[4-[Bicyclo[3.3.1]non-9-ylidene(4-hydroxyphenyl)methyl]phenyl]but-3-enoic acid (22).**<sup>1</sup>H NMR (500 MHz, methanol-*d*<sub>4</sub>)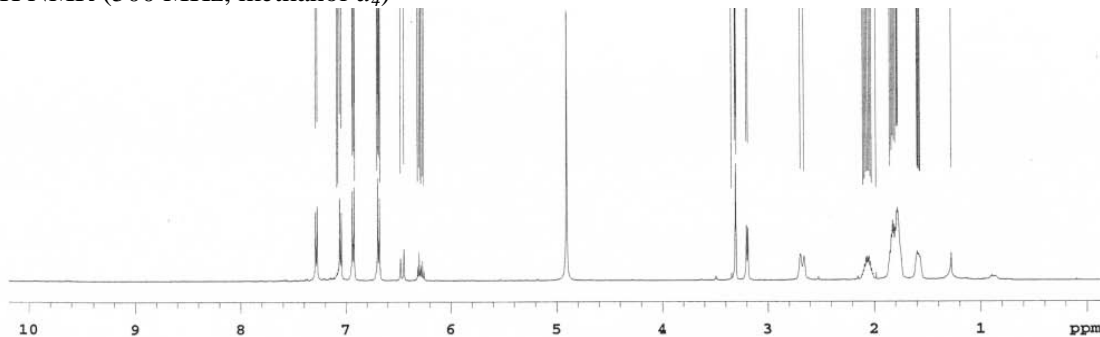<sup>13</sup>C NMR (125 MHz, methanol-*d*<sub>4</sub>)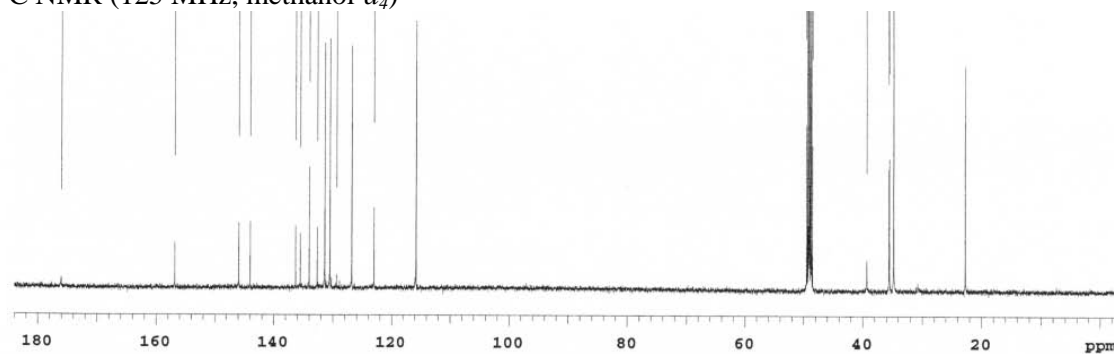**(E)-5-[4-[bicyclo[3.3.1]non-9-ylidene(4-hydroxyphenyl)methyl]phenyl]pent-4-enoic acid (23).**<sup>1</sup>H NMR (500 MHz, methanol-*d*<sub>4</sub>)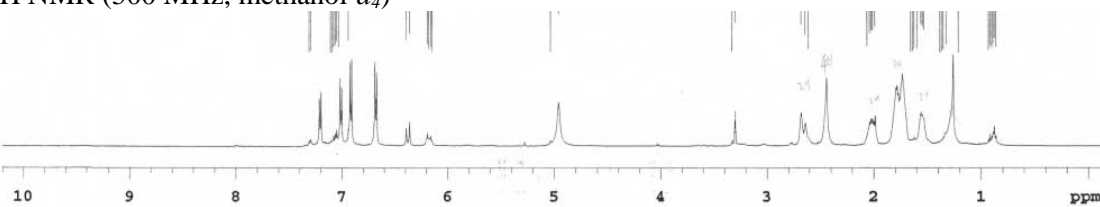<sup>13</sup>C NMR (125 MHz, methanol-*d*<sub>4</sub>)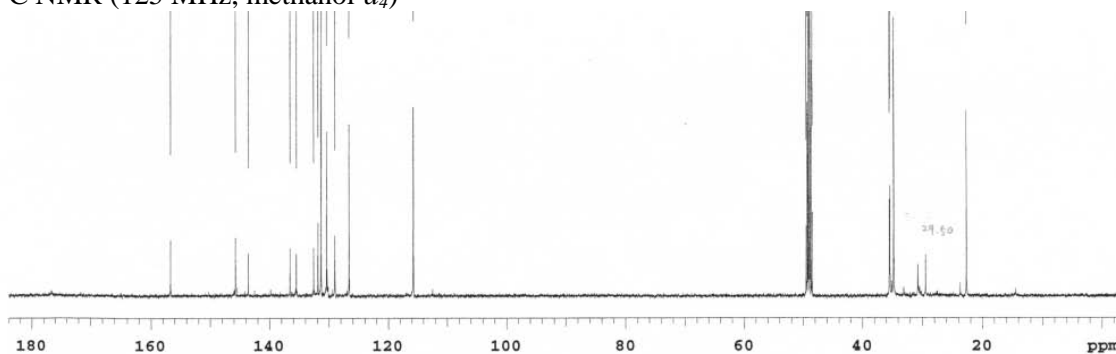

**(E)-6-[4-[Bicyclo[3.3.1]non-9-ylidene(4-hydroxyphenyl)methyl]phenyl]hex-5-enoic acid (24).**<sup>1</sup>H NMR (500 MHz, methanol-*d*<sub>4</sub>)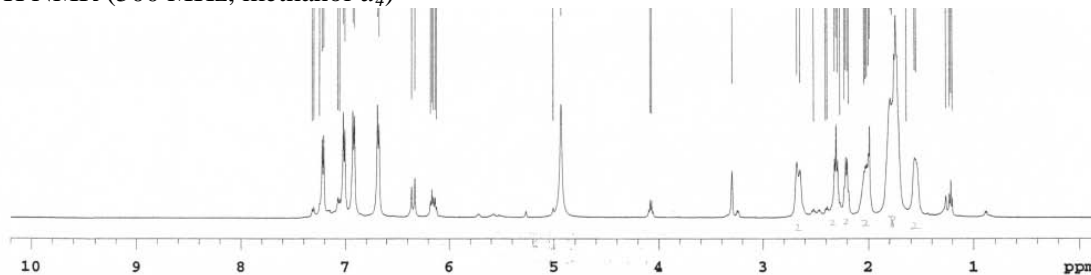<sup>13</sup>C NMR (125 MHz, methanol-*d*<sub>4</sub>)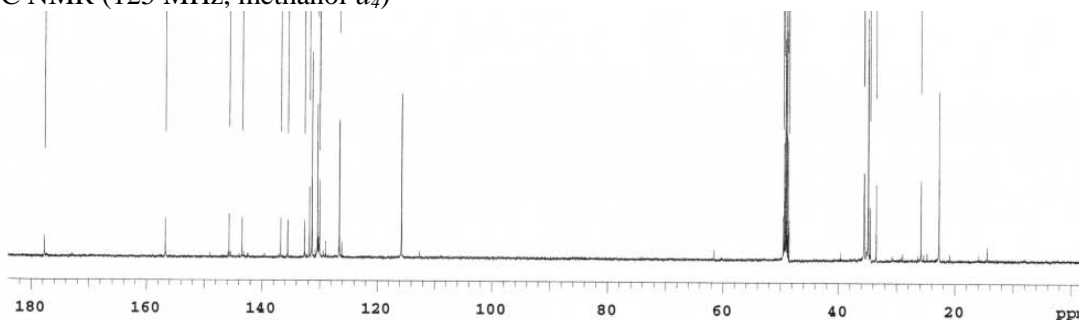**(E)-7-[4-[Bicyclo[3.3.1]non-9-ylidene(4-hydroxyphenyl)methyl]phenyl]hept-6-enoic acid (25).**<sup>1</sup>H NMR (500 MHz, methanol-*d*<sub>4</sub>)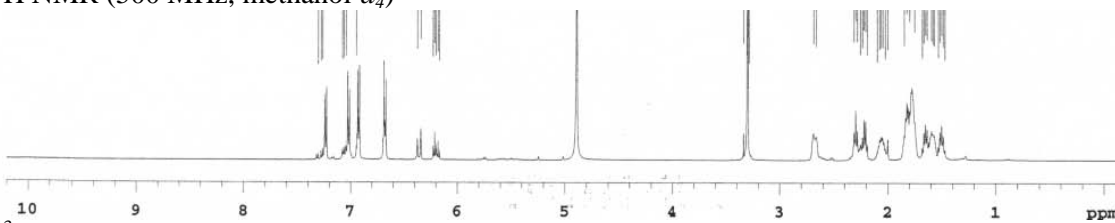<sup>13</sup>C NMR (125 MHz, methanol-*d*<sub>4</sub>)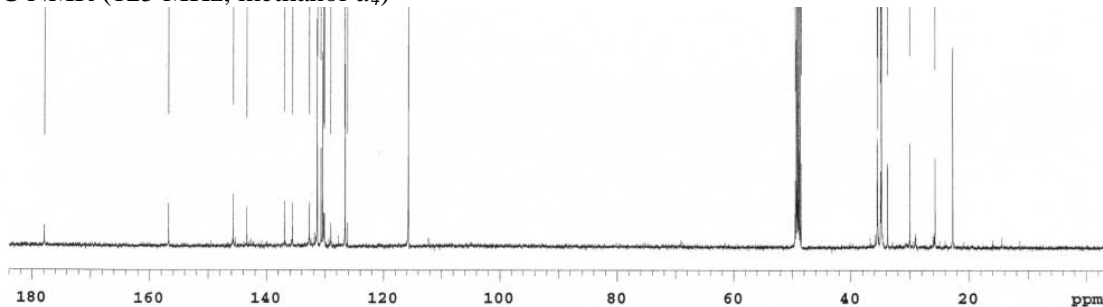

**Methyl hydrogen 4-[bicyclo[3.3.1]non-9-ylidene(4-hydroxyphenyl)methyl]styrylphosphonate (26).**<sup>1</sup>H NMR (500 MHz, methanol-*d*<sub>4</sub>)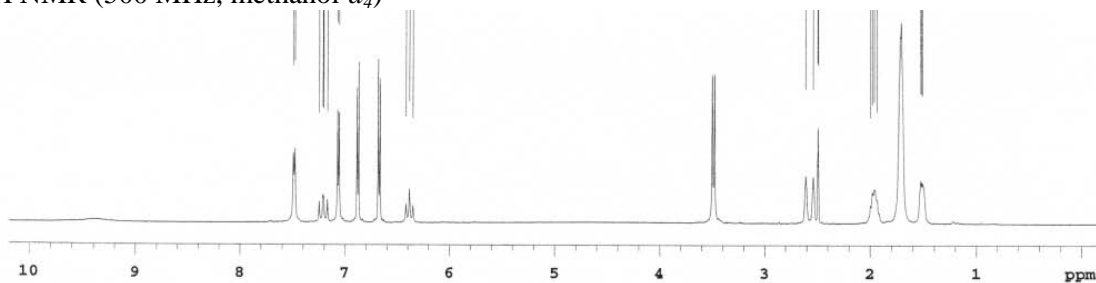<sup>13</sup>C NMR (125 MHz, methanol-*d*<sub>4</sub>)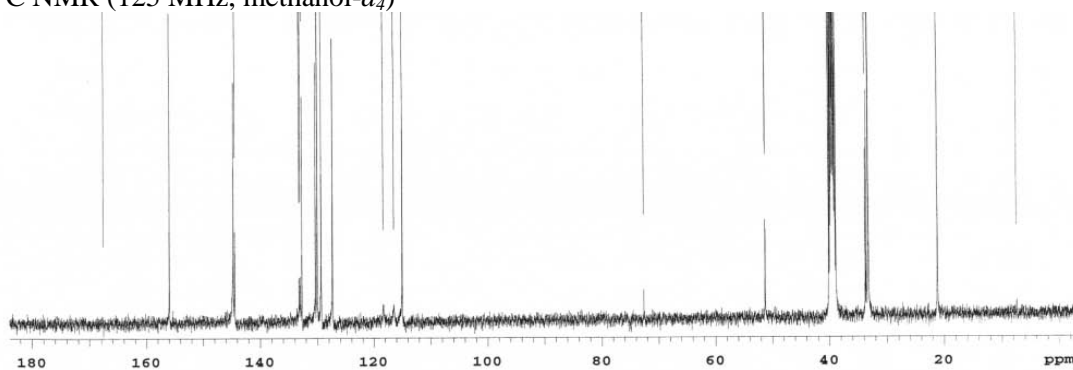**Ethyl 4-[4-[bicyclo[3.3.1]non-9-ylidene(4-hydroxyphenyl)methyl]phenoxy]butanoate (27).**<sup>1</sup>H NMR (400 MHz, CDCl<sub>3</sub>)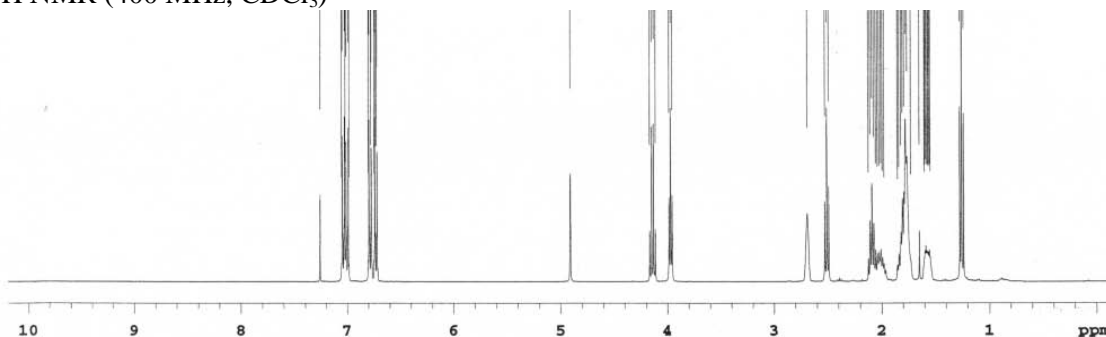<sup>13</sup>C NMR (100 MHz, CDCl<sub>3</sub>)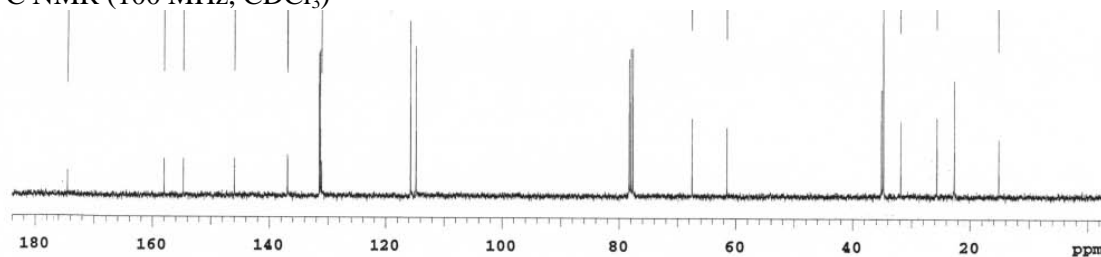

**Methyl 5-[4-[bicyclo[3.3.1]non-9-ylidene(4-hydroxyphenyl)methyl]phenoxy]pentanoate (28).**<sup>1</sup>H NMR (400 MHz, CDCl<sub>3</sub>)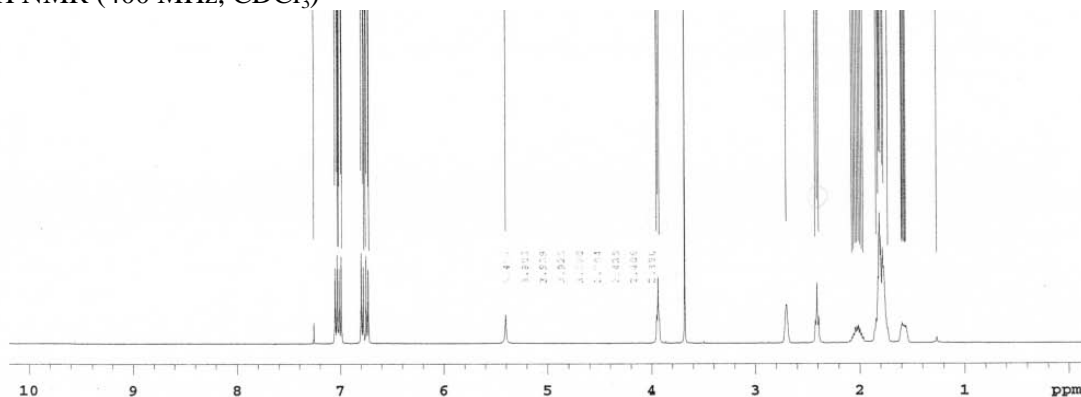<sup>13</sup>C NMR (100 MHz, CDCl<sub>3</sub>)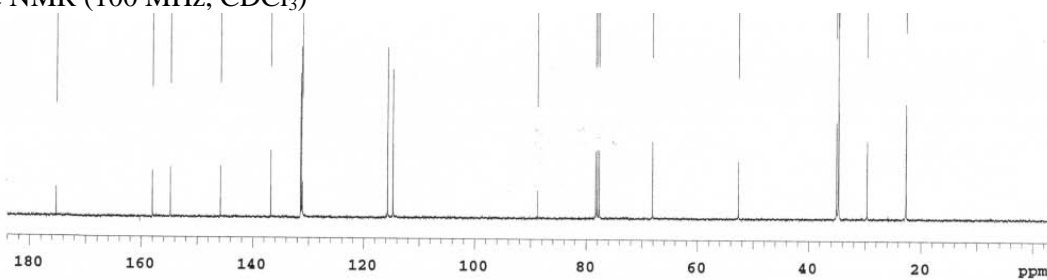**Ethyl 6-[4-[bicyclo[3.3.1]non-9-ylidene(4-hydroxyphenyl)methyl]phenoxy]hexanoate (29).**<sup>1</sup>H NMR (400 MHz, CDCl<sub>3</sub>)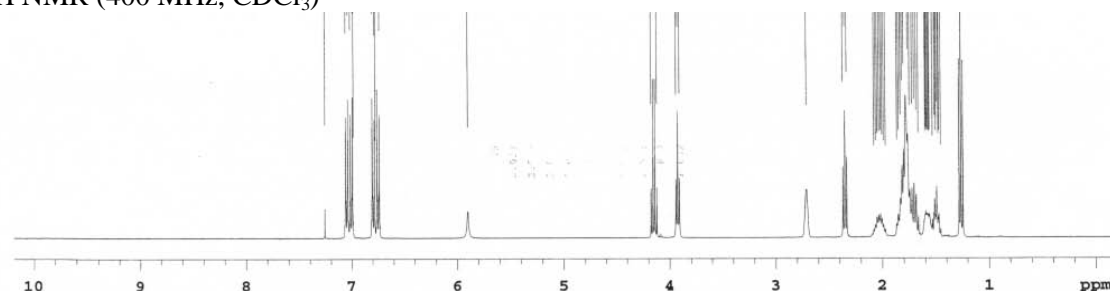<sup>13</sup>C NMR (100 MHz, CDCl<sub>3</sub>)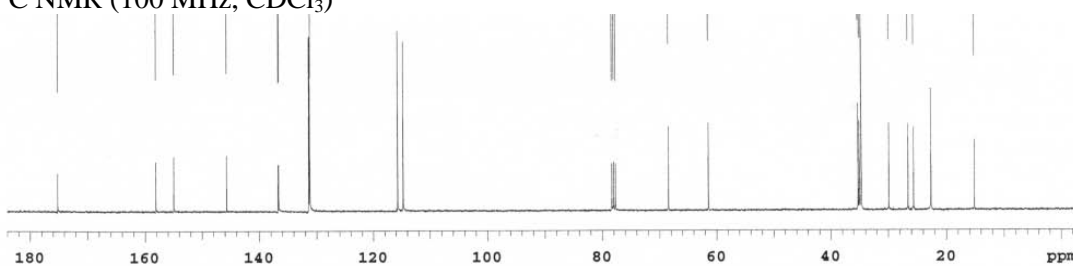

**Ethyl 7-[4-[bicyclo[3.3.1]non-9-ylidene(4-hydroxyphenyl)methyl]phenoxy]heptanoate (30).**<sup>1</sup>H NMR (500 MHz, CDCl<sub>3</sub>)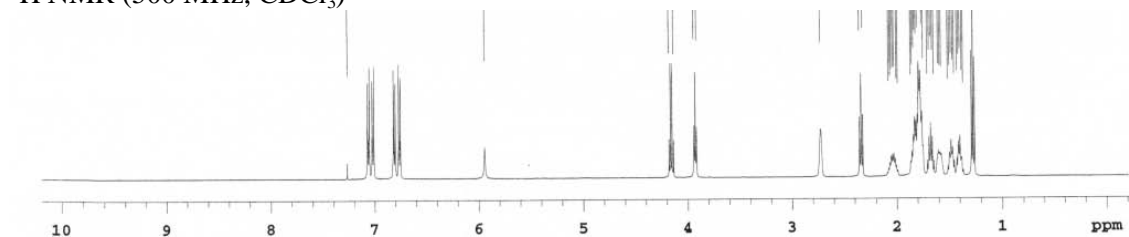<sup>13</sup>C NMR (125 MHz, CDCl<sub>3</sub>)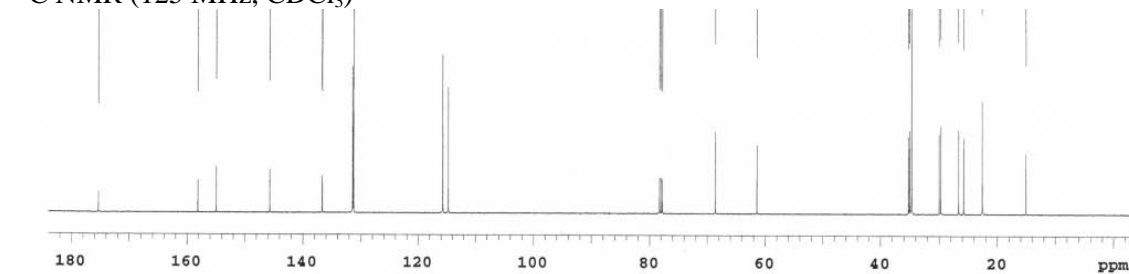**Ethyl 11-[4-[bicyclo[3.3.1]non-9-ylidene(4-hydroxyphenyl)methyl]phenoxy]nudecanoate (31).**<sup>1</sup>H NMR (500 MHz, CDCl<sub>3</sub>)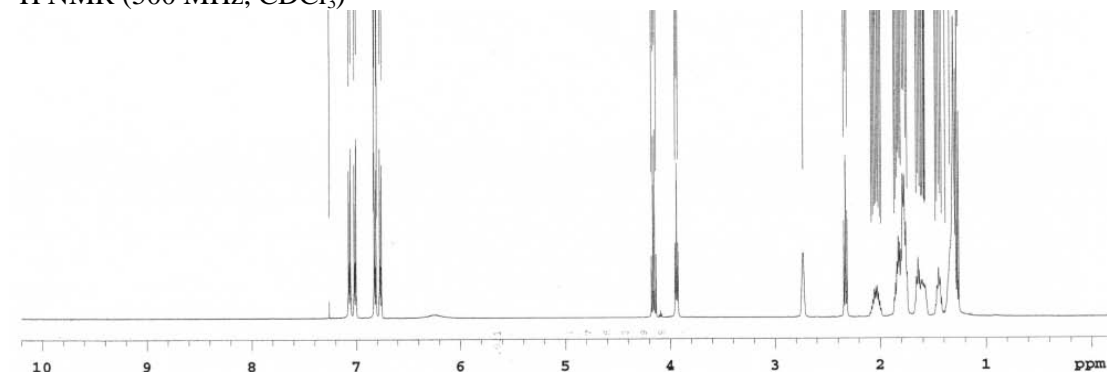<sup>13</sup>C NMR (125 MHz, CDCl<sub>3</sub>)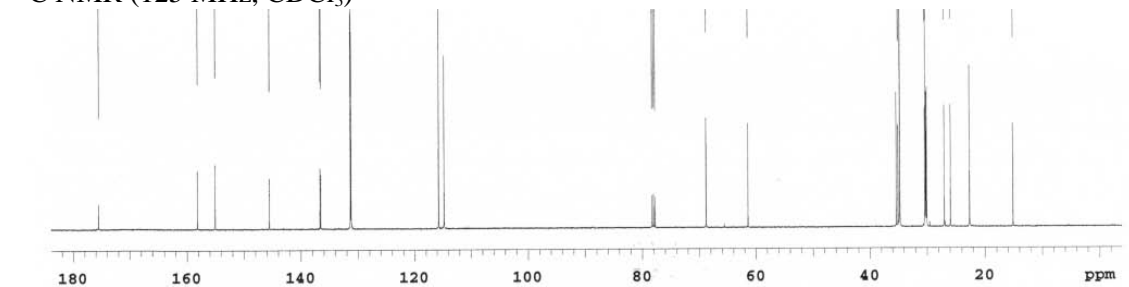



**4-[4-[Bicyclo[3.3.1]non-9-ylidene(4-hydroxyphenyl)methyl]phenoxy]butanoic acid (32).**<sup>1</sup>H NMR (500 MHz, methanol-*d*<sub>4</sub>)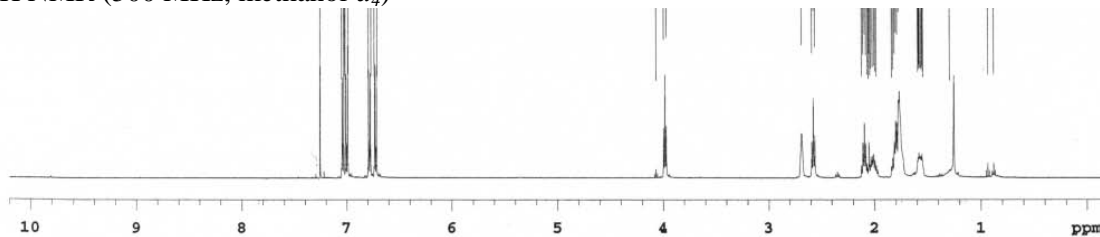<sup>13</sup>C NMR (125 MHz, methanol-*d*<sub>4</sub>)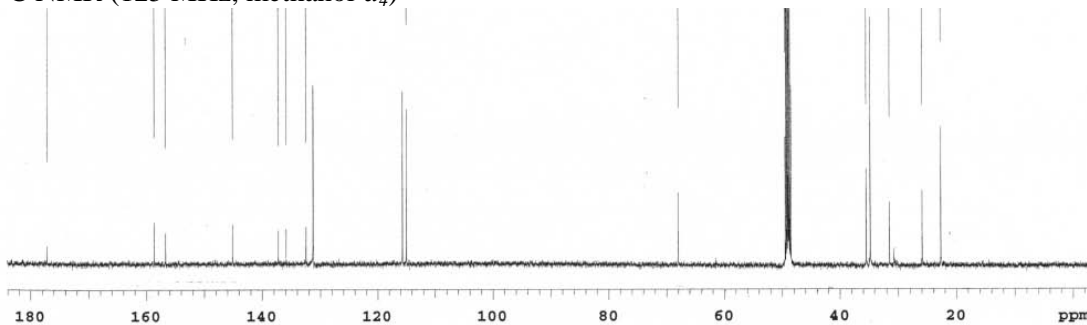**5-[4-[Bicyclo[3.3.1]non-9-ylidene(4-hydroxyphenyl)methyl]phenoxy]pentanoic acid (33).**<sup>1</sup>H NMR (400 MHz, methanol-*d*<sub>4</sub>)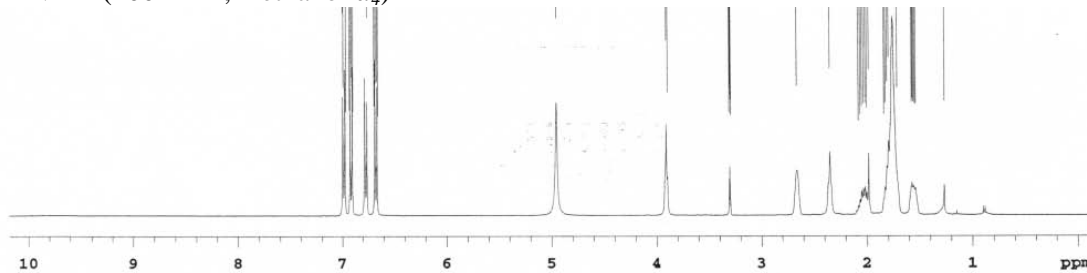<sup>13</sup>C NMR (100 MHz, methanol-*d*<sub>4</sub>)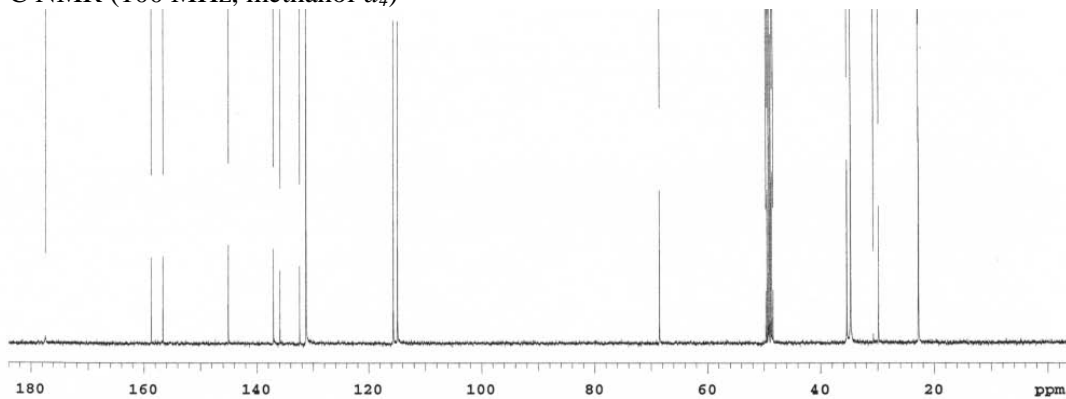

**6-[4-[Bicyclo[3.3.1]non-9-ylidene(4-hydroxyphenyl)methyl]phenoxy]hexanoic acid (34).**<sup>1</sup>H NMR (400 MHz, methanol-*d*<sub>4</sub>)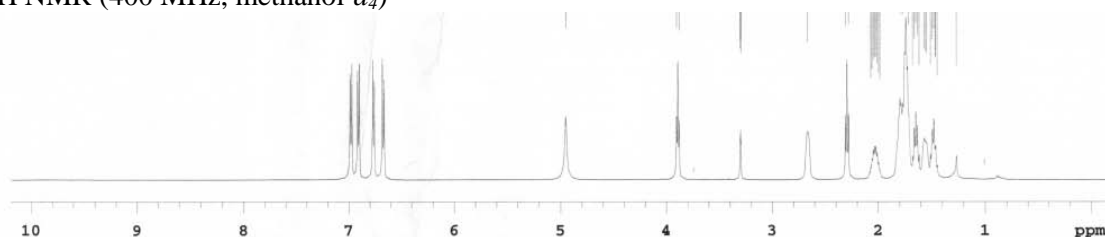<sup>13</sup>C NMR (100 MHz, methanol-*d*<sub>4</sub>)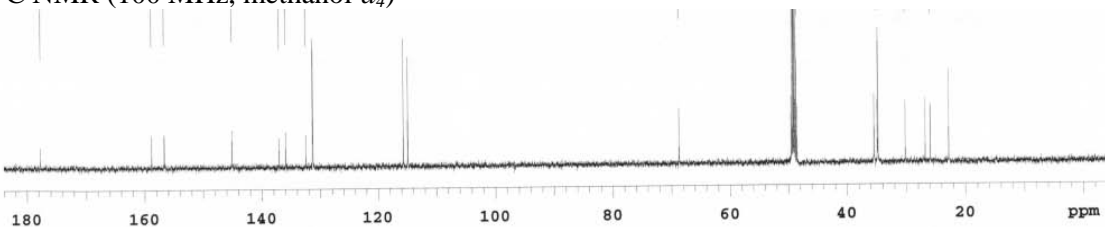**7-[4-[Bicyclo[3.3.1]non-9-ylidene(4-hydroxyphenyl)methyl]phenoxy]heptanoic acid (35).**<sup>1</sup>H NMR (500 MHz, methanol-*d*<sub>4</sub>)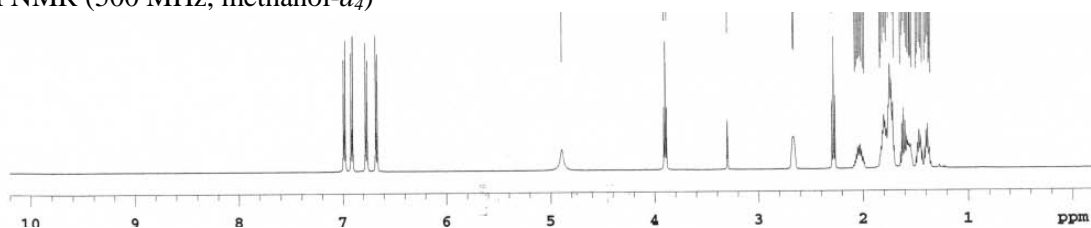<sup>13</sup>C NMR (125 MHz, methanol-*d*<sub>4</sub>)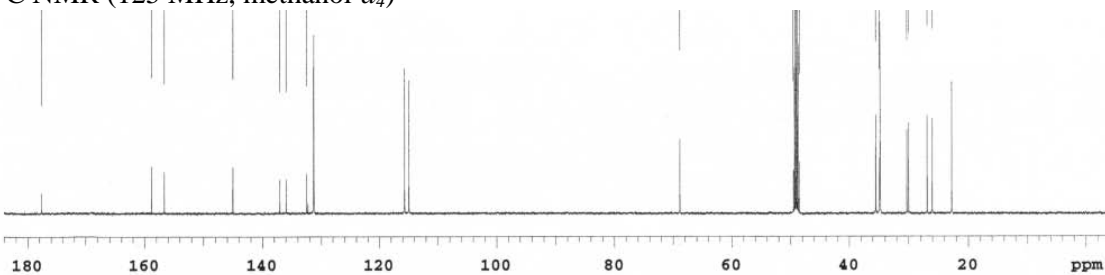

**11-[4-[bicyclo[3.3.1]non-9-ylidene(4-hydroxyphenyl)methyl]phenoxy]nudecanoic acid (36).**<sup>1</sup>H NMR (500 MHz, methanol-*d*<sub>4</sub>)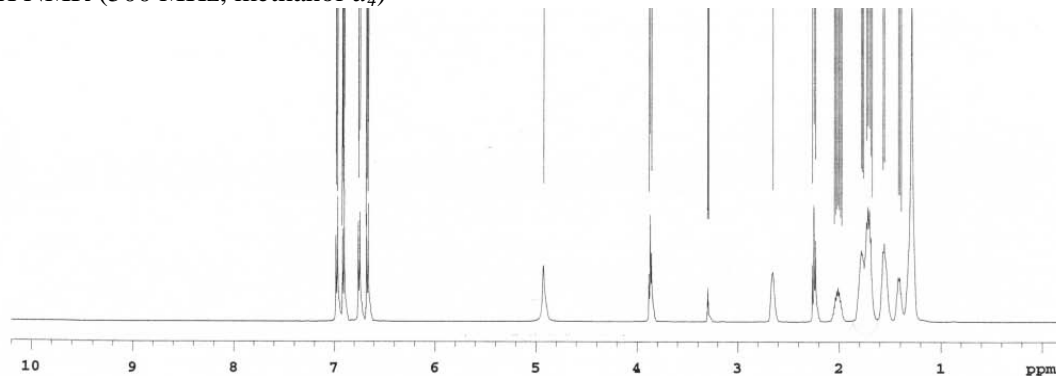<sup>13</sup>C NMR (125 MHz, methanol-*d*<sub>4</sub>)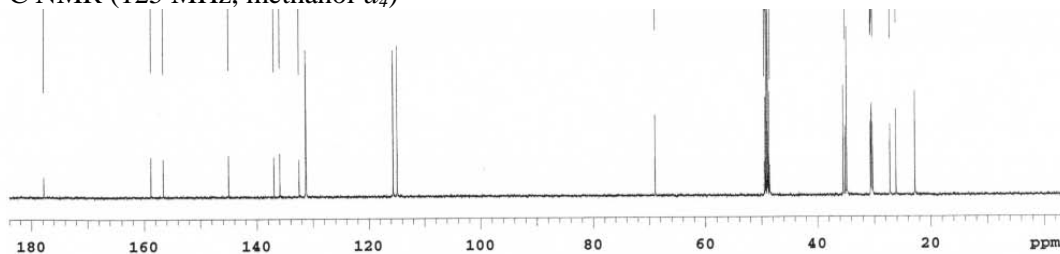**(4-*tert*-Butyldimethylsilyloxyphenyl) (4-hydroxyphenyl) methylenecyclohexane (37).**<sup>1</sup>H NMR (400 MHz, CDCl<sub>3</sub>)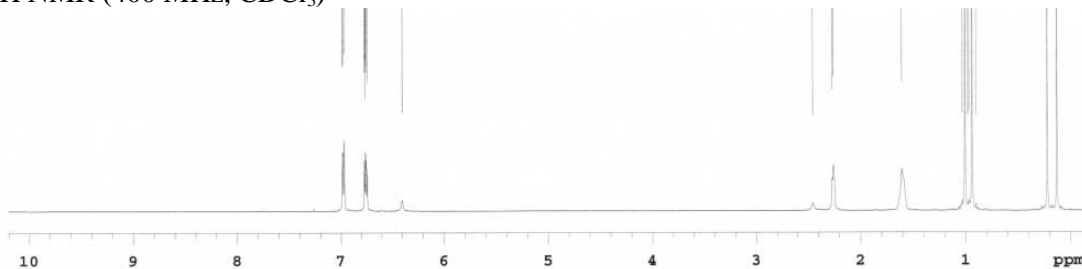<sup>13</sup>C NMR (100 MHz, CDCl<sub>3</sub>)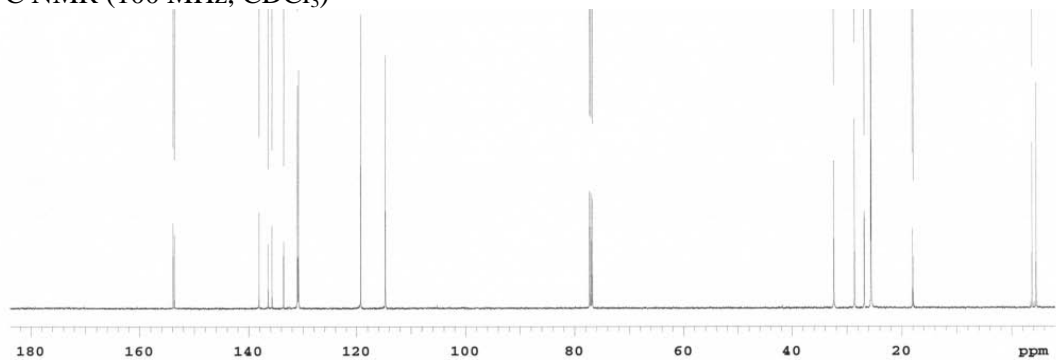

**(4-Hydroxyphenyl) (4-trifluoromethanesulfonylphenyl) methylenecyclohexane (38).**<sup>1</sup>H NMR (500 MHz, CDCl<sub>3</sub>)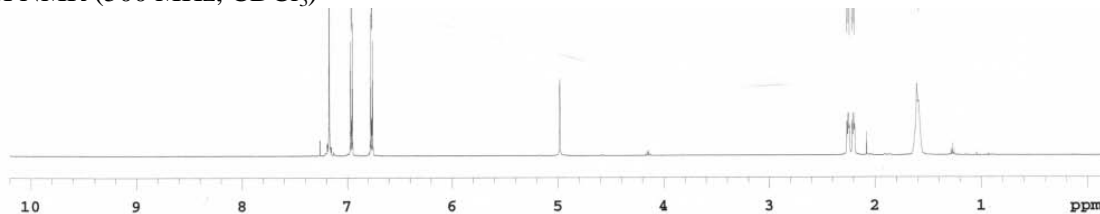<sup>13</sup>C NMR (125 MHz, CDCl<sub>3</sub>)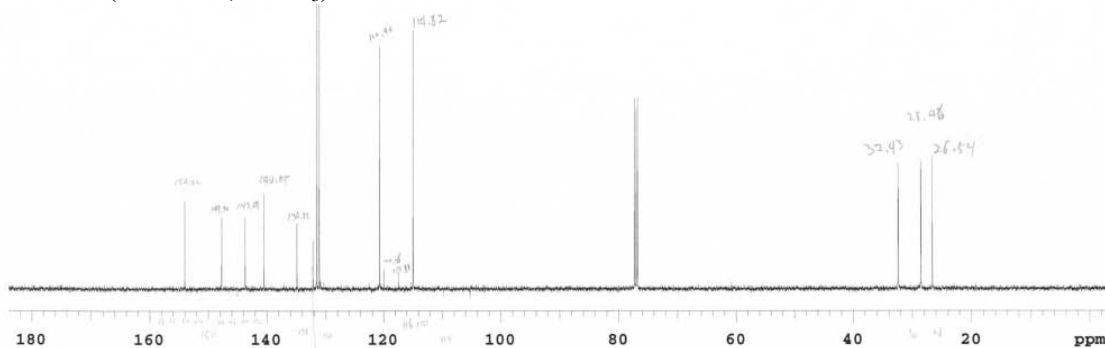**(E)-ethyl 3-[4-[cyclohexylidene(4-hydroxyphenyl)methyl]phenyl]acrylate (39).**<sup>1</sup>H NMR (400 MHz, CDCl<sub>3</sub>)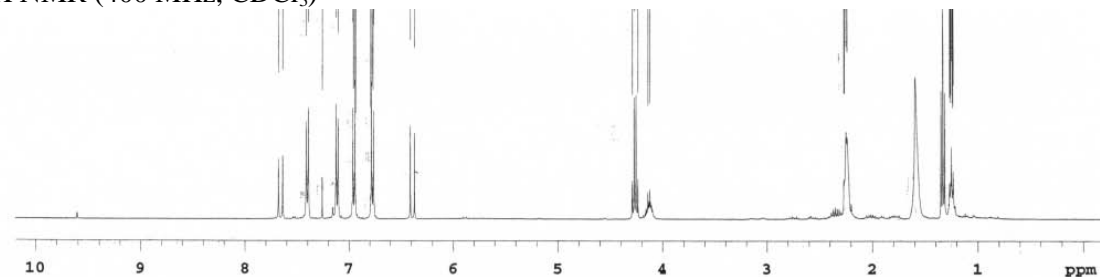<sup>13</sup>C NMR (100 MHz, CDCl<sub>3</sub>)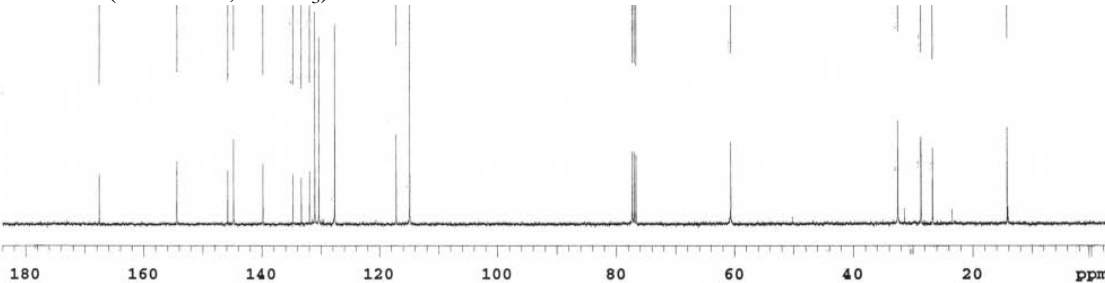

**Ethyl 6-[4-[cyclohexylidene(4-hydroxyphenyl)methyl]phenoxy]hexanoate (40).**<sup>1</sup>H NMR (500 MHz, CDCl<sub>3</sub>)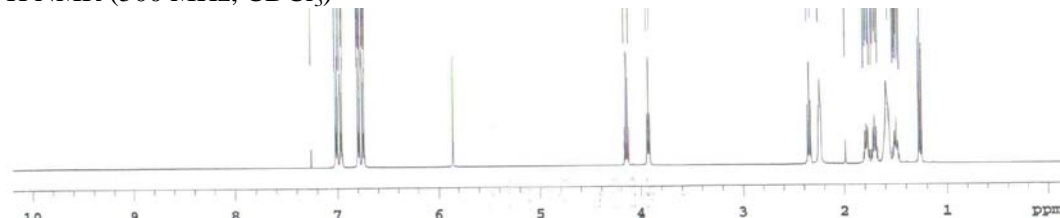<sup>13</sup>C NMR (125 MHz, CDCl<sub>3</sub>)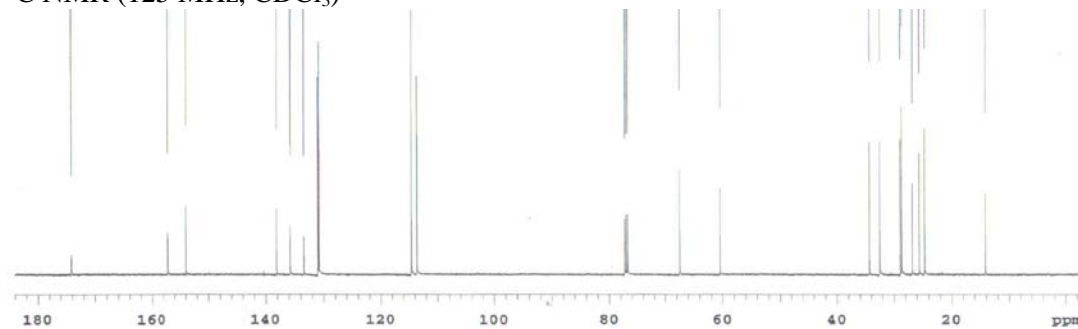**Methyl 2-[4-[cyclohexylidene(4-*tert*-butyldimethylsilyloxyphenyl)methyl]phenoxy]acetate (41).**<sup>1</sup>H NMR (400 MHz, CDCl<sub>3</sub>)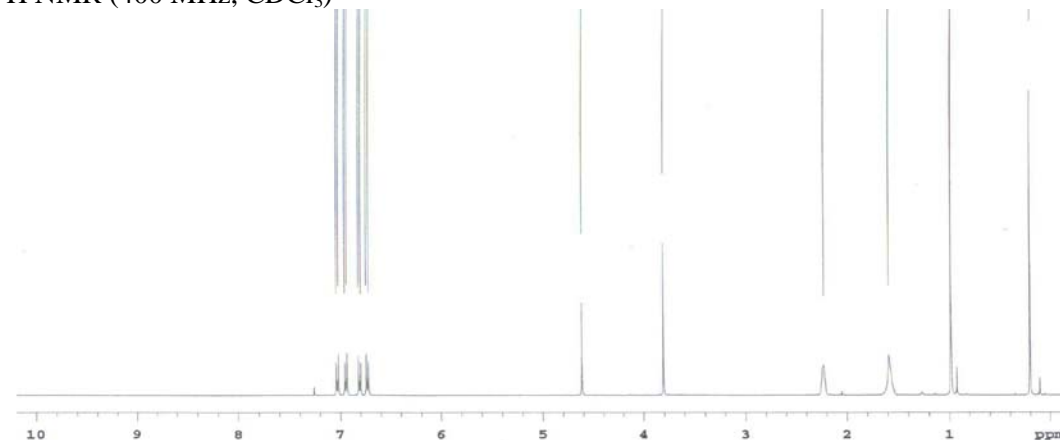<sup>13</sup>C NMR (100 MHz, CDCl<sub>3</sub>)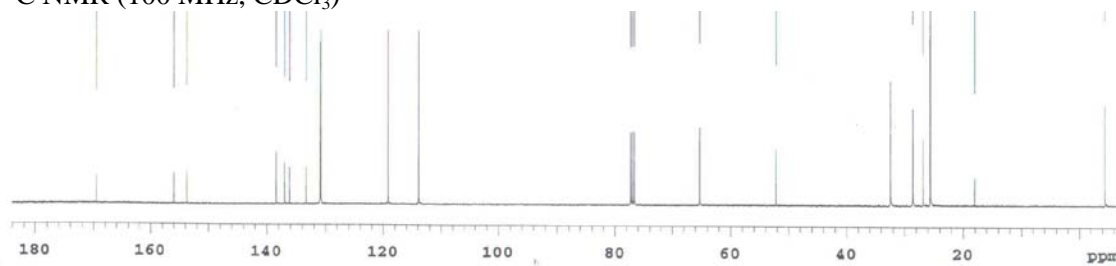

**(E)-3-[4-[cyclohexylidene(4-hydroxyphenyl)methyl]phenyl]acrylic acid (42).**<sup>1</sup>H NMR (500 MHz, methanol-*d*<sub>4</sub>)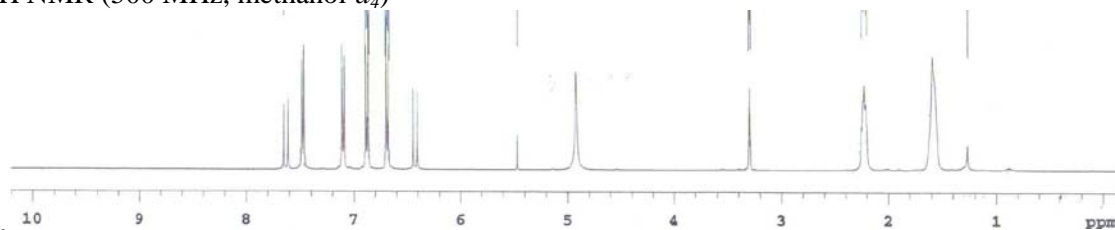<sup>13</sup>C NMR (125 MHz, methanol-*d*<sub>4</sub>)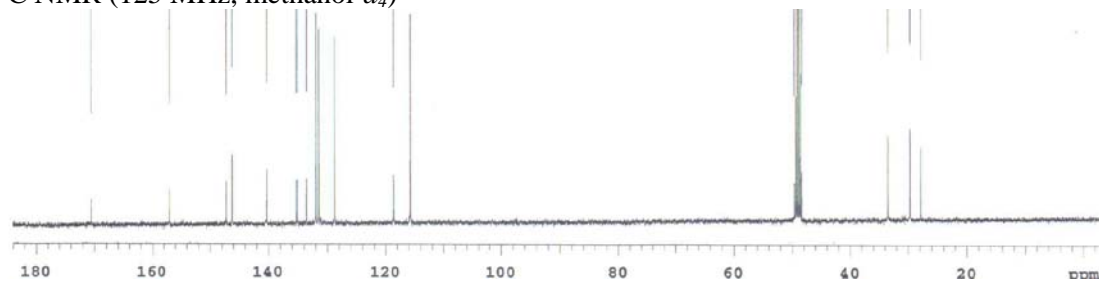**6-[4-[cyclohexylidene(4-hydroxyphenyl)methyl]phenoxy]hexanoic acid (43).**<sup>1</sup>H NMR (500 MHz, methanol-*d*<sub>4</sub>)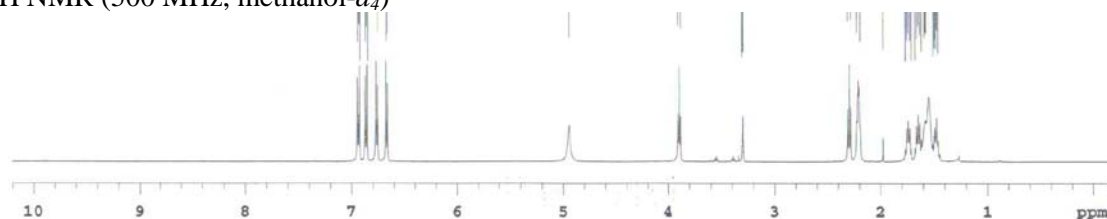<sup>13</sup>C NMR (125 MHz, methanol-*d*<sub>4</sub>)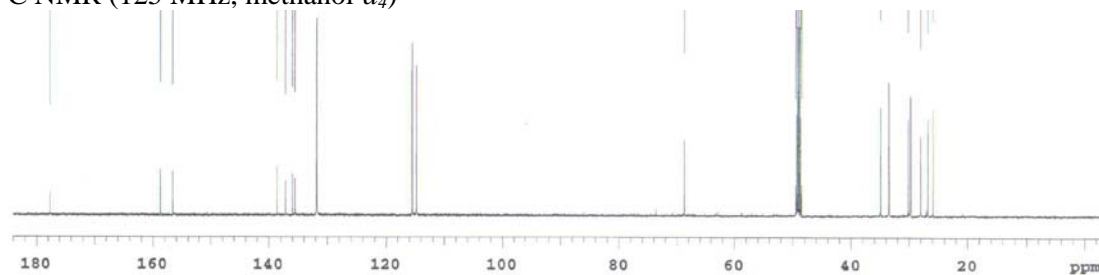

**2-[4-[Cyclohexylidene(4-hydroxyphenyl)methyl]phenoxy]acetic acid (44).**<sup>1</sup>H NMR (500 MHz, methanol-*d*<sub>4</sub>)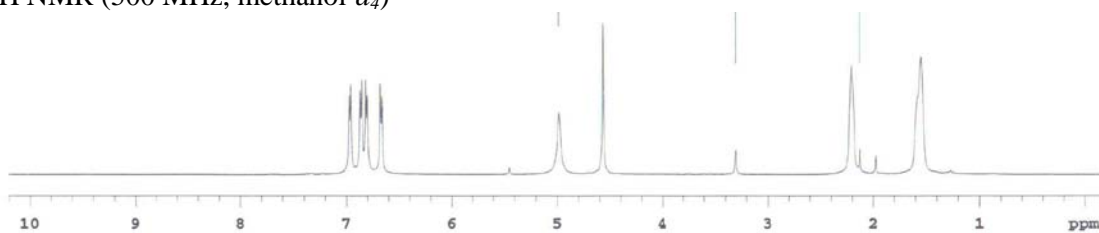<sup>13</sup>C NMR (125 MHz, methanol-*d*<sub>4</sub>)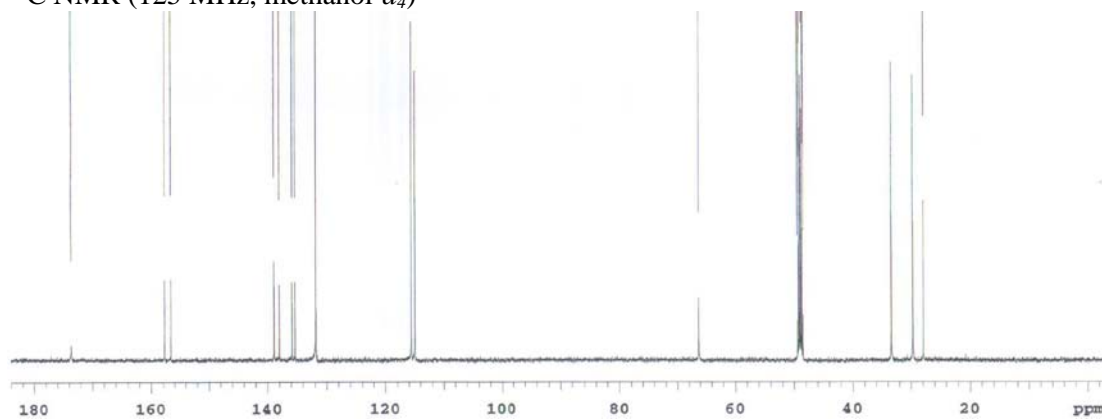**Ethyl 6-[4-[bicyclo[3.3.1]non-9-ylidene(phenyl)methyl]phenoxy]hexanoate (45).**<sup>1</sup>H NMR (500 MHz, CDCl<sub>3</sub>)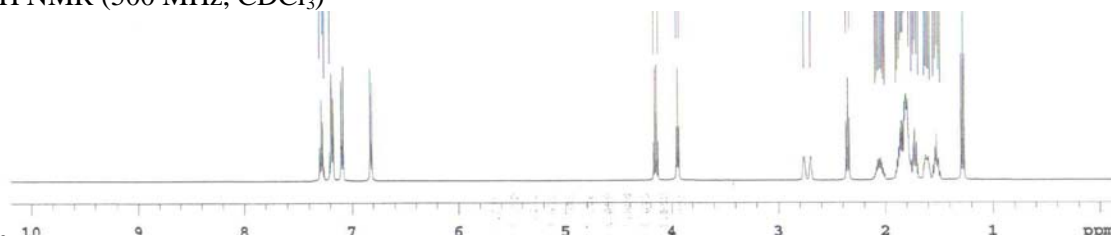<sup>13</sup>C NMR (125 MHz, CDCl<sub>3</sub>)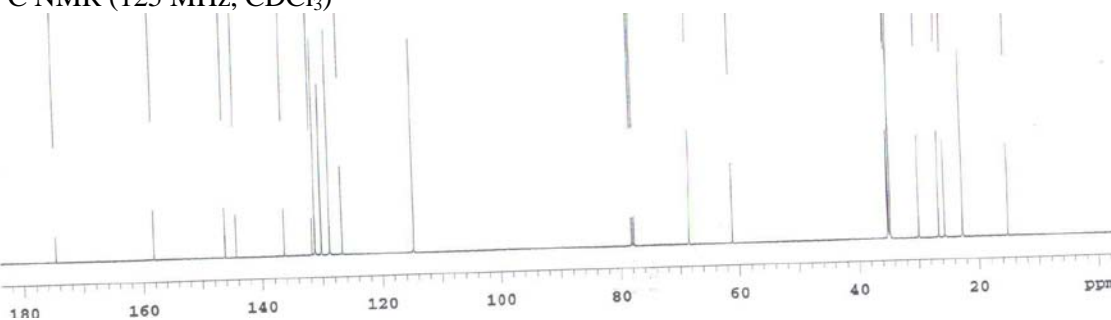

**6-[4-[bicyclo[3.3.1]non-9-ylidene(phenyl)methyl]phenoxy]hexanoic acid (46).**<sup>1</sup>H NMR (500 MHz, methanol-*d*<sub>4</sub>)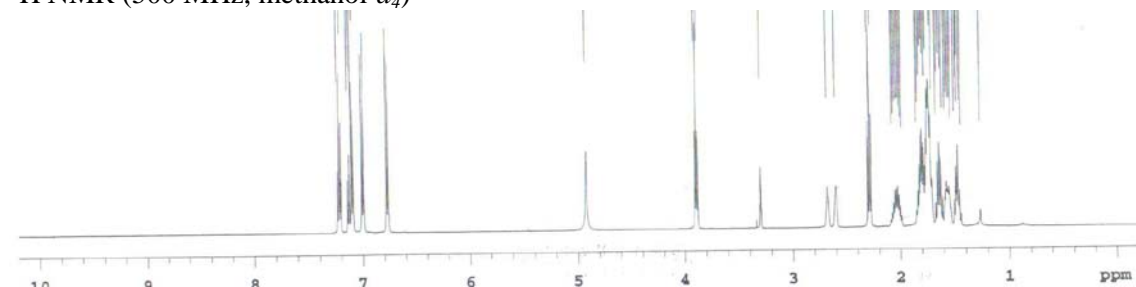<sup>13</sup>C NMR (125 MHz, methanol-*d*<sub>4</sub>)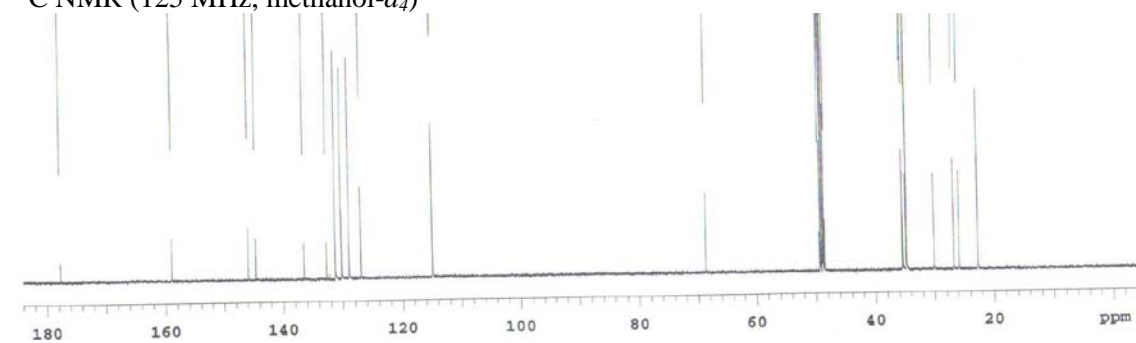



**HPLC Spectra**

**9-[(4-Trifluoromethanesulfonylphenyl) (4-hydroxyphenyl) methylene]bicyclo[3.3.1]-nonane (11).**

Reverse Phase (Method H<sub>2</sub>O:MeOH:AcOH 10:90:0.1, Flow rate 1mL/min)

**Area Percent Report**

Page 1 of 2

Data File: D:\DWKIM\dwk-ii-47rp-1.dat

Acquired: 5/4/2006 11:06:27 PM

Printed: 05/22/2006

03:11:09 AM

Analyst: System

Sample ID: dwk-ii-47

Vial: N/A

Injection Volume: 0

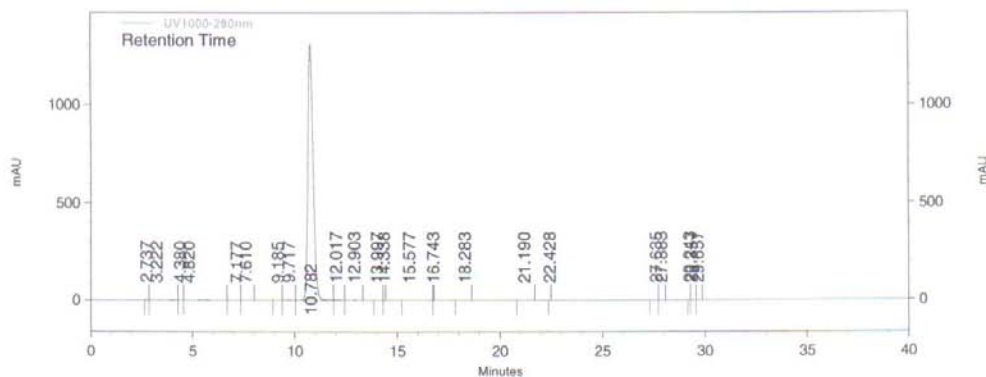

UV1000-280nm  
 Results (System  
 (5/5/2006  
 12:22:50 AM)  
 (Reprocessed))

| Name | Retention Time | Area     | Area Percent | Integration Codes |
|------|----------------|----------|--------------|-------------------|
|      | 2.737          | 10677    | 0.046        | BD                |
|      | 3.222          | 75297    | 0.322        | BD                |
|      | 4.380          | 12176    | 0.052        | VV                |
|      | 4.820          | 73886    | 0.316        | VD                |
|      | 7.177          | 6645     | 0.028        | VV                |
|      | 7.610          | 5533     | 0.024        | VB                |
|      | 9.185          | 2809     | 0.012        | BV                |
|      | 9.717          | 13601    | 0.058        | VV                |
|      | 10.782         | 23135761 | 98.986       | VD                |
|      | 12.017         | 13090    | 0.056        | VV                |
|      | 12.903         | 10258    | 0.044        | VB                |
|      | 13.997         | 722      | 0.003        | BB                |
|      | 14.338         | 79       | 0.000        | BB                |
|      | 15.577         | 2208     | 0.009        | BD                |
|      | 16.743         | 36       | 0.000        | VB                |
|      | 18.283         | 3371     | 0.014        | BB                |

**Normal Phase** (Method EtOAc:Hx:AcOH 10:90:0.2, Flow rate 1mL/min)

**Area Percent Report**

Page 1 of 2

Data File: D:\DWKIM\dwk-ii-47np-1.dat  
 Acquired: 5/10/2006 3:02:13 PM  
 04:07:15 PM

Printed: 05/10/2006

Analyst: System

Sample ID: dwk-ii-47

Vial: N/A

Injection Volume: 0

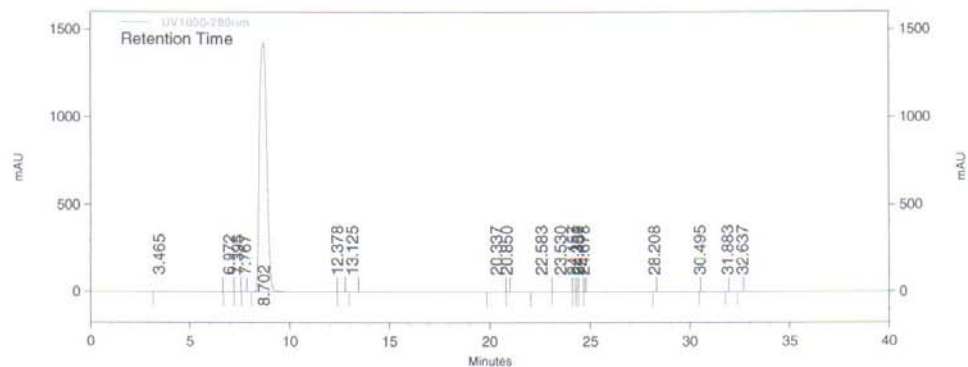

UV1000-280nm  
 Results (System  
 (5/10/2006  
 4:02:25 PM)  
 (Original))

| Name | Retention Time | Area     | Area Percent | Integration Codes |
|------|----------------|----------|--------------|-------------------|
|      | 3.465          | 80594    | 0.224        | BD                |
|      | 6.972          | 7484     | 0.021        | BV                |
|      | 7.395          | 2016     | 0.006        | VB                |
|      | 7.767          | 554      | 0.002        | BB                |
|      | 8.702          | 35829871 | 99.596       | BD                |
|      | 12.378         | 1152     | 0.003        | VB                |
|      | 13.125         | 1073     | 0.003        | BB                |
|      | 20.337         | 9400     | 0.026        | BD                |
|      | 20.850         | 303      | 0.001        | VB                |
|      | 22.583         | 18037    | 0.050        | BV                |
|      | 23.530         | 21888    | 0.061        | VV                |
|      | 24.157         | 992      | 0.003        | VV                |
|      | 24.350         | 578      | 0.002        | VV                |
|      | 24.437         | 747      | 0.002        | VV                |
|      | 24.678         | 101      | 0.000        | VB                |
|      | 28.208         | 152      | 0.000        | BB                |

**2-[4-[Bicyclo[3.3.1]non-9-ylidene(4-hydroxyphenyl)methyl]phenoxy]acetic acid (15).****Reverse Phase** (Method H<sub>2</sub>O:MeOH:AcOH 20:80:0.1, Flow rate 1mL/min)**Area Percent Report**

Page 1 of 2

Data File: D:\DWKIM\dwk-i-195rp-5.dat

Acquired: 5/2/2006 11:33:51 PM

Printed: 05/03/2006

12:39:00 AM

Analyst: System

Sample ID: dwk-i-195

Vial: N/A

Injection Volume: 0

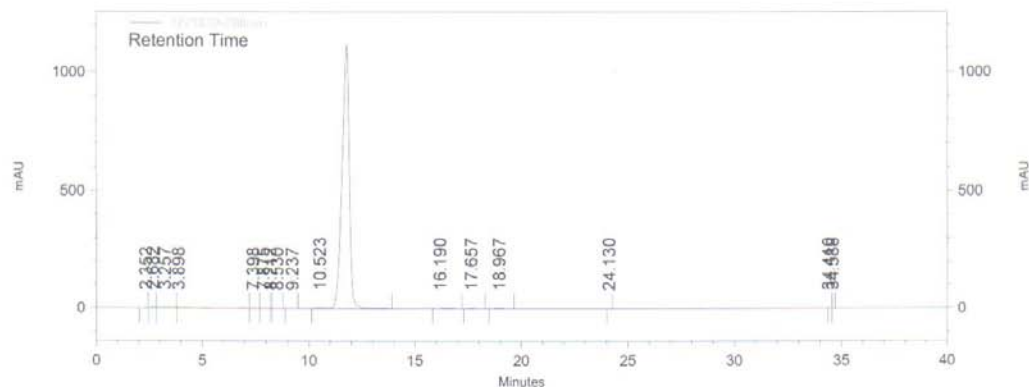

UV1000-280nm  
 Results (System  
 (5/3/2006  
 12:33:58 AM)  
 (Original))

| Name | Retention Time | Area     | Area Percent | Integration Codes |
|------|----------------|----------|--------------|-------------------|
|      | 2.352          | 6708     | 0.025        | BD                |
|      | 2.682          | 35379    | 0.133        | VV                |
|      | 3.257          | 64965    | 0.245        | VD                |
|      | 3.898          | 79825    | 0.301        | VD                |
|      | 7.398          | 6391     | 0.024        | VV                |
|      | 7.875          | 4595     | 0.017        | VV                |
|      | 8.212          | 225      | 0.001        | VV                |
|      | 8.530          | 2328     | 0.009        | VB                |
|      | 9.237          | 2443     | 0.009        | BB                |
|      | 10.523         | 26281173 | 99.065       | BD                |
|      | 16.190         | 21817    | 0.082        | BD                |
|      | 17.657         | 9342     | 0.035        | BB                |
|      | 18.967         | 13668    | 0.052        | BB                |
|      | 24.130         | 206      | 0.001        | BD                |
|      | 34.410         | 146      | 0.001        | BV                |
|      | 34.588         | 120      | 0.000        | VB                |

Normal Phase (Method *i*-PrOH:CH<sub>2</sub>Cl<sub>2</sub>:AcOH 10:90:0.5, Flow rate 1mL/min)

## Area Percent Report

Page 1 of 2

Data File: D:\DWKIM\dwk-i-195np-3.dat

Acquired: 5/11/2006 10:21:37 PM

Printed: 05/22/2006

03:04:51 AM

Analyst: System

Sample ID: dwk-i-195

Vial: N/A

Injection Volume: 0

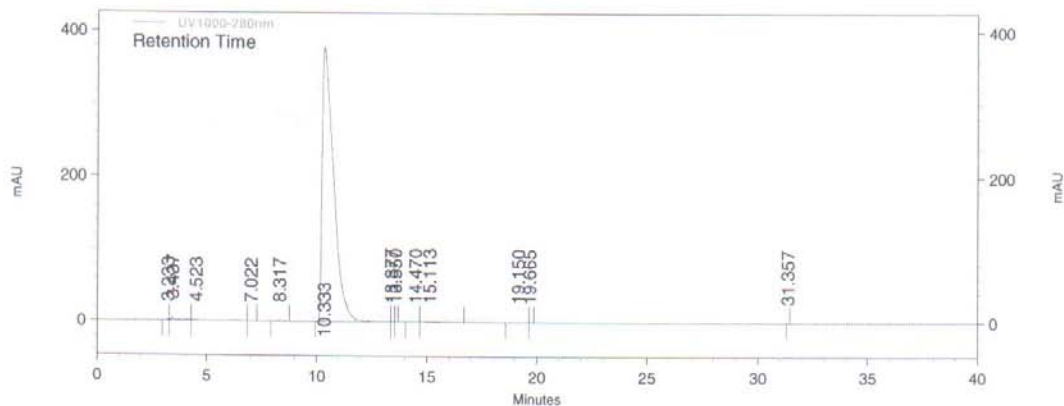

UV1000-280nm  
Results (System  
(5/22/2006  
3:04:33 AM)  
(Reprocessed)  
(Aborted Run))

| Name | Retention Time | Area     | Area Percent | Integration Codes |
|------|----------------|----------|--------------|-------------------|
|      | 3.233          | 4544     | 0.033        | BD                |
|      | 3.437          | 56269    | 0.411        | BD                |
|      | 4.523          | 27026    | 0.197        | VD                |
|      | 7.022          | 1545     | 0.011        | VB                |
|      | 8.317          | 13786    | 0.101        | BB                |
|      | 10.333         | 13570550 | 99.047       | BD                |
|      | 13.377         | 564      | 0.004        | VV                |
|      | 13.550         | 155      | 0.001        | VB                |
|      | 14.470         | 5086     | 0.037        | BV                |
|      | 15.113         | 14119    | 0.103        | VD                |
|      | 19.150         | 7007     | 0.051        | BV                |
|      | 19.665         | 283      | 0.002        | VD                |
|      | 31.357         | 129      | 0.001        | BB                |

**(E)-3-[4-[bicyclo[3.3.1]non-9-ylidene(4-hydroxyphenyl)methyl]phenyl]acrylic acid (17).****Reverse Phase** (Method H<sub>2</sub>O:MeOH:AcOH 20:80:0.1, Flow rate 1mL/min)**Area Percent Report**

Page 1 of 2

Data File: D:\DWKIM\dwk-i-211rp.dat

Acquired: 5/3/2006 12:16:03 PM

Printed: 05/22/2006

03:10:14 AM

Analyst: System

Sample ID: dwk-i-211

Vial: N/A

Injection Volume: 0

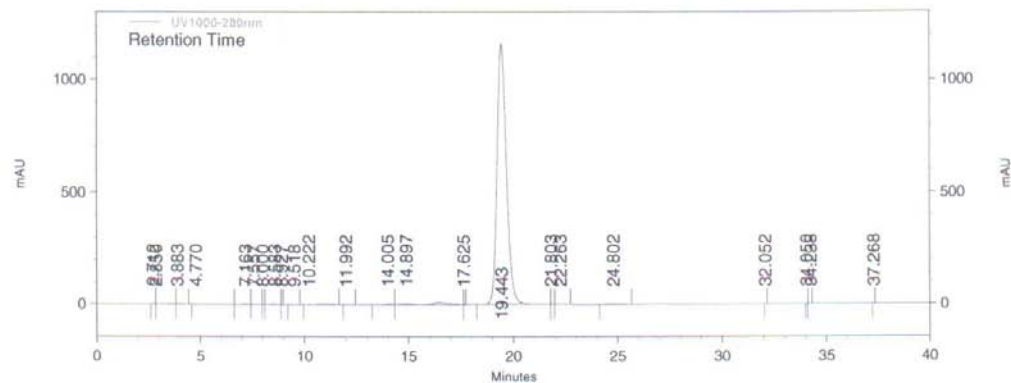

UV1000-280nm  
 Results (System  
 (5/3/2006  
 1:16:11 PM)  
 (Original))

| Name | Retention Time | Area     | Area Percent | Integration Codes |
|------|----------------|----------|--------------|-------------------|
|      | 2.712          | 14809    | 0.041        | BD                |
|      | 2.850          | 42540    | 0.117        | BD                |
|      | 3.883          | 15494    | 0.042        | VD                |
|      | 4.770          | 5579     | 0.015        | BD                |
|      | 7.163          | 4823     | 0.013        | VV                |
|      | 7.557          | 2345     | 0.006        | VV                |
|      | 8.000          | 123      | 0.000        | VB                |
|      | 8.583          | 4164     | 0.011        | BV                |
|      | 8.927          | 77       | 0.000        | VB                |
|      | 9.518          | 942      | 0.003        | BB                |
|      | 10.222         | 31022    | 0.085        | BD                |
|      | 11.992         | 1322     | 0.004        | BB                |
|      | 14.005         | 7406     | 0.020        | BV                |
|      | 14.897         | 365259   | 1.002        | VD                |
|      | 17.625         | 94       | 0.000        | VB                |
|      | 19.443         | 35933002 | 98.537       | BD                |

**Normal Phase** (Method *i*-PrOH:CH<sub>2</sub>Cl<sub>2</sub>:Hx:AcOH 5:35:60:0.5, Flow rate 1mL/min)

**Area Percent Report**

Page 1 of 2

Data File: D:\DWKIM\dwk-i-211np-3.dat

Acquired: 5/12/2006 9:38:02 PM

03:09:05 AM

Printed: 05/22/2006

Analyst: System

Sample ID: dwk-i-211

Vial: N/A

Injection Volume: 0

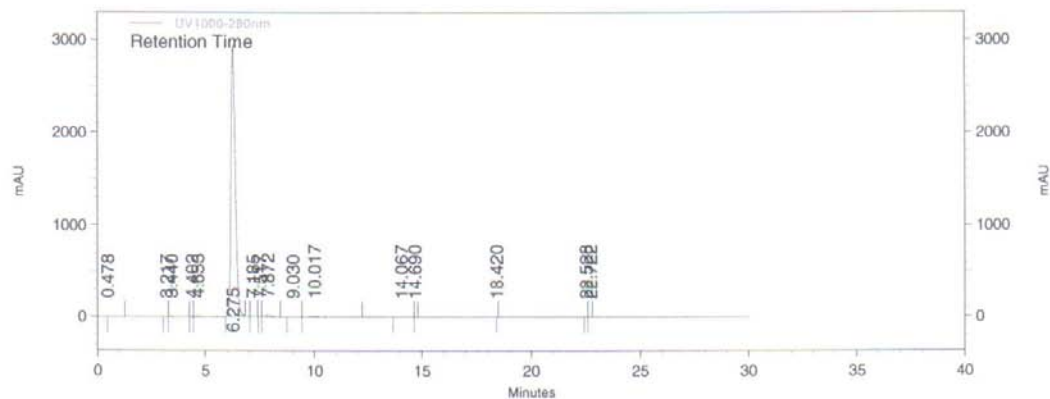

UV1000-280nm  
 Results (System  
 (5/12/2006  
 10:08:09 PM)  
 (Reprocessed)  
 (Aborted Run))

| Name | Retention Time | Area     | Area Percent | Integration Codes |
|------|----------------|----------|--------------|-------------------|
|      | 0.478          | 226      | 0.001        | BD                |
|      | 3.217          | 8070     | 0.020        | BD                |
|      | 3.440          | 103539   | 0.254        | BD                |
|      | 4.402          | 18350    | 0.045        | VV                |
|      | 4.653          | 228953   | 0.562        | VD                |
|      | 6.275          | 40043971 | 98.232       | MM                |
|      | 7.185          | 10776    | 0.026        | BB                |
|      | 7.517          | 1230     | 0.003        | BV                |
|      | 7.872          | 234001   | 0.574        | VB                |
|      | 9.030          | 11088    | 0.027        | BV                |
|      | 10.017         | 94591    | 0.232        | VD                |
|      | 14.067         | 9461     | 0.023        | BV                |
|      | 14.690         | 161      | 0.000        | VB                |
|      | 18.420         | 52       | 0.000        | BD                |

**(E)-4-[4-[Bicyclo[3.3.1]non-9-ylidene(4-hydroxyphenyl)methyl]phenyl]but-3-enoic acid (22).**

**Reverse Phase** (Method H<sub>2</sub>O:MeOH:AcOH 15:85:0.1, Flow rate 1mL/min)

**Area Percent Report**

Page 1 of 2

Data File: D:\DWKIM\dwk-ii-41rp-p-1.dat

Acquired: 5/4/2006 12:58:52 PM

Printed: 05/04/2006

01:45:07 PM

Analyst: System

Sample ID: dwk-ii-41

Vial: N/A

Injection Volume: 0

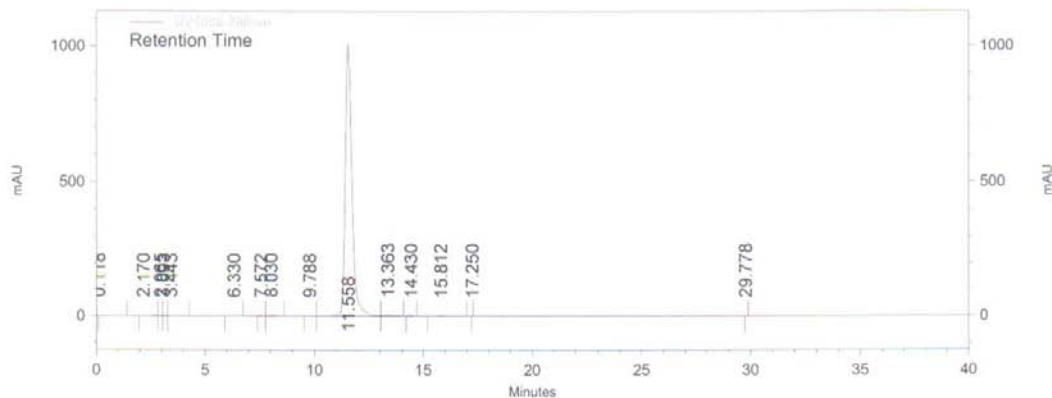

UV1000-280nm

Results

(Acquisition in progress)

| Name | Retention Time | Area     | Area Percent | Integration Codes |
|------|----------------|----------|--------------|-------------------|
|      | 0.118          | 2338     | 0.011        | BD                |
|      | 2.170          | 25613    | 0.119        | BD                |
|      | 2.965          | 5025     | 0.023        | BV                |
|      | 3.093          | 5250     | 0.024        | VV                |
|      | 3.443          | 9471     | 0.044        | VD                |
|      | 6.330          | 3791     | 0.018        | BD                |
|      | 7.572          | 1433     | 0.007        | BV                |
|      | 8.030          | 15827    | 0.074        | VB                |
|      | 9.788          | 2289     | 0.011        | BV                |
|      | 11.558         | 21351224 | 99.360       | VD                |
|      | 13.363         | 56321    | 0.262        | VB                |
|      | 14.430         | 2264     | 0.011        | BB                |
|      | 15.812         | 7842     | 0.036        | BD                |
|      | 17.250         | 36       | 0.000        | BB                |
|      | 29.778         | 63       | 0.000        | BD                |

**Normal Phase** (Method *i*-PrOH:CH<sub>2</sub>Cl<sub>2</sub>:Hx:AcOH 5:35:60:0.5, Flow rate 1mL/min)

**Area Percent Report**

Page 1 of 1

Data File: D:\DWKIM\dwk-ii-41-np-3.dat

Acquired: 5/15/2006 12:09:11 PM

Printed: 05/22/2006

03:11:50 AM

Analyst: System

Sample ID: dwk-ii-41

Vial: N/A

Injection Volume: 0

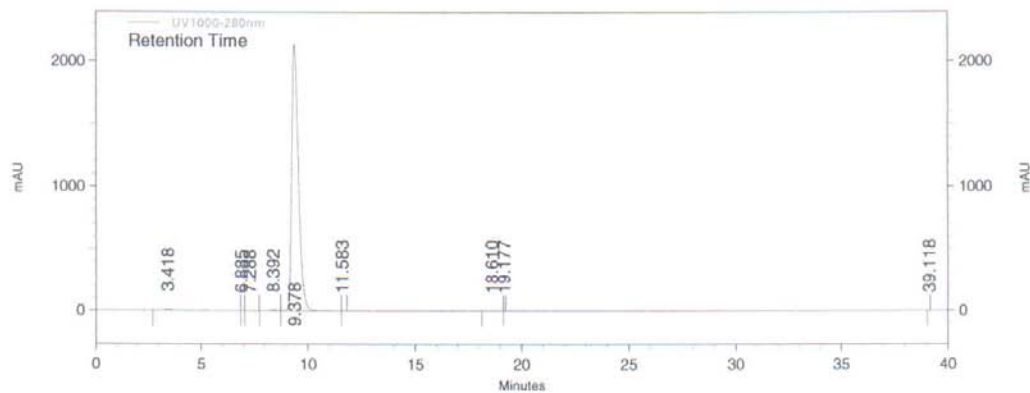

**UV1000-280nm**  
**Results (System**  
**(5/15/2006**  
**12:49:40 PM)**  
**(Reprocessed)**  
**(Aborted Run))**

| Name | Retention Time | Area     | Area Percent | Integration Codes |
|------|----------------|----------|--------------|-------------------|
|      | 3.418          | 249790   | 0.539        | BD                |
|      | 6.885          | 1843     | 0.004        | VV                |
|      | 7.288          | 5679     | 0.012        | VB                |
|      | 8.392          | 126201   | 0.272        | BV                |
|      | 9.378          | 45970496 | 99.154       | VD                |
|      | 11.583         | 401      | 0.001        | VB                |
|      | 18.610         | 8262     | 0.018        | BD                |
|      | 19.177         | 64       | 0.000        | VB                |
|      | 39.118         | 71       | 0.000        | BD                |

|        |  |          |         |  |
|--------|--|----------|---------|--|
| Totals |  | 46362807 | 100.000 |  |
|--------|--|----------|---------|--|



**(E)-5-[4-[bicyclo[3.3.1]non-9-ylidene(4-hydroxyphenyl)methyl]phenyl]pent-4-enoic acid (23).**

**Reverse Phase** (Method H<sub>2</sub>O:MeOH:AcOH 10:90:0.1, Flow rate 1mL/min)

**Area Percent Report**

Page 1 of 2

Data File: D:\DWKIM\dwk-i-265rp-1.dat

Acquired: 5/3/2006 11:55:50 PM

Printed: 05/04/2006

12:36:02 AM

Analyst: System

Sample ID: dwk-i-265

Vial: N/A

Injection Volume: 0

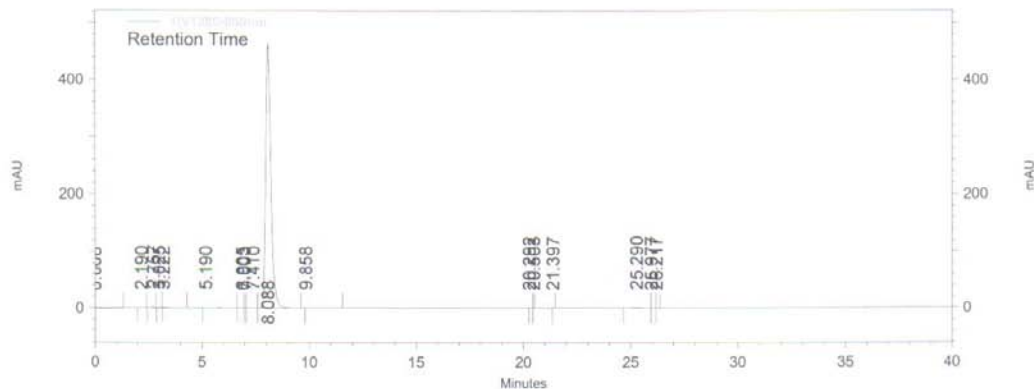

**UV1000-280nm**

**Results**

(Acquisition in progress)

| Name | Retention Time | Area    | Area Percent | Integration Codes |
|------|----------------|---------|--------------|-------------------|
|      | 0.008          | 71034   | 0.897        | BD                |
|      | 2.190          | 1847    | 0.023        | BD                |
|      | 2.757          | 14166   | 0.179        | BB                |
|      | 3.025          | 11370   | 0.144        | BV                |
|      | 3.222          | 19221   | 0.243        | VD                |
|      | 5.190          | 11619   | 0.147        | BD                |
|      | 6.905          | 591     | 0.007        | BV                |
|      | 7.003          | 154     | 0.002        | VV                |
|      | 7.410          | 2653    | 0.034        | VV                |
|      | 8.088          | 7747487 | 97.841       | VB                |
|      | 9.858          | 3194    | 0.040        | BD                |
|      | 20.292         | 93      | 0.001        | BD                |
|      | 20.503         | 30      | 0.000        | BB                |
|      | 21.397         | 82      | 0.001        | BB                |
|      | 25.290         | 34261   | 0.433        | BV                |
|      | 25.977         | 466     | 0.006        | VV                |
|      | 26.217         | 189     | 0.002        | VB                |

**Normal Phase** (Method *i*-PrOH:CH<sub>2</sub>Cl<sub>2</sub>:Hx:AcOH 3:27:70:0.5, Flow rate 1mL/min)

**Area Percent Report**

Page 1 of 1

Data File: D:\DWKIM\dwk-i-265-np-6.dat  
 Acquired: 5/15/2006 3:32:48 PM  
 03:13:03 AM

Printed: 05/22/2006

Analyst: System

Sample ID: dwk-i-265

Vial: N/A

Injection Volume: 0

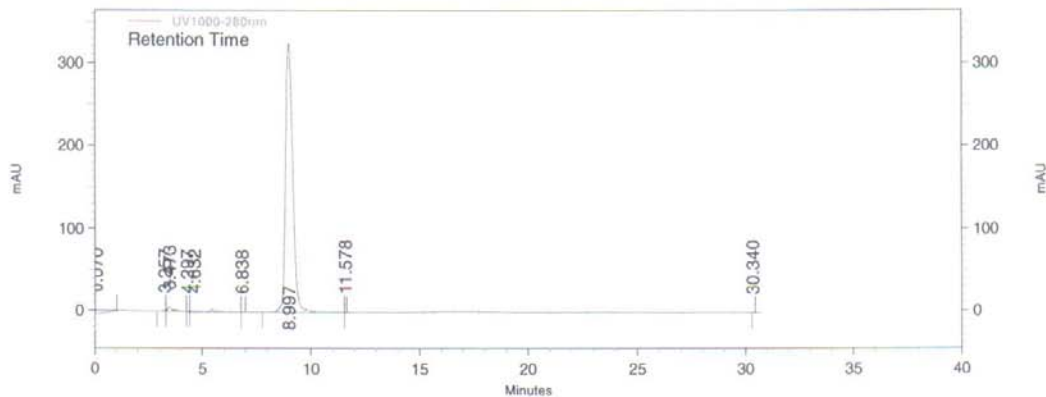

**UV1000-280nm**  
**Results (System**  
**(5/15/2006**  
**4:03:40 PM)**  
**(Reprocessed)**  
**(Aborted Run)**

| Name | Retention Time | Area    | Area Percent | Integration Codes |
|------|----------------|---------|--------------|-------------------|
|      | 0.070          | 147301  | 1.887        | MM                |
|      | 3.257          | 10024   | 0.128        | BV                |
|      | 3.473          | 90064   | 1.154        | VD                |
|      | 4.297          | 2108    | 0.027        | VV                |
|      | 4.632          | 46016   | 0.589        | VD                |
|      | 6.838          | 143     | 0.002        | VB                |
|      | 8.997          | 7510726 | 96.210       | BD                |
|      | 11.578         | 78      | 0.001        | VB                |
|      | 30.340         | 106     | 0.001        | BD                |

|        |  |         |         |  |
|--------|--|---------|---------|--|
| Totals |  | 7806566 | 100.000 |  |
|--------|--|---------|---------|--|

**(E)-6-[4-[Bicyclo[3.3.1]non-9-ylidene(4-hydroxyphenyl)methyl]phenyl]hex-5-enoic acid (24).**

**Reverse Phase** (Method H<sub>2</sub>O:MeOH:AcOH 10:90:0.1, Flow rate 1mL/min)

**Area Percent Report**

Page 1 of 2

Data File: D:\DWKIM\dwk-ii-87rp-1.dat

Acquired: 5/1/2006 11:17:35 AM

Printed: 05/01/2006

01:13:38 PM

Analyst: System

Sample ID: dwk-ii-87

Vial: N/A

Injection Volume: 0

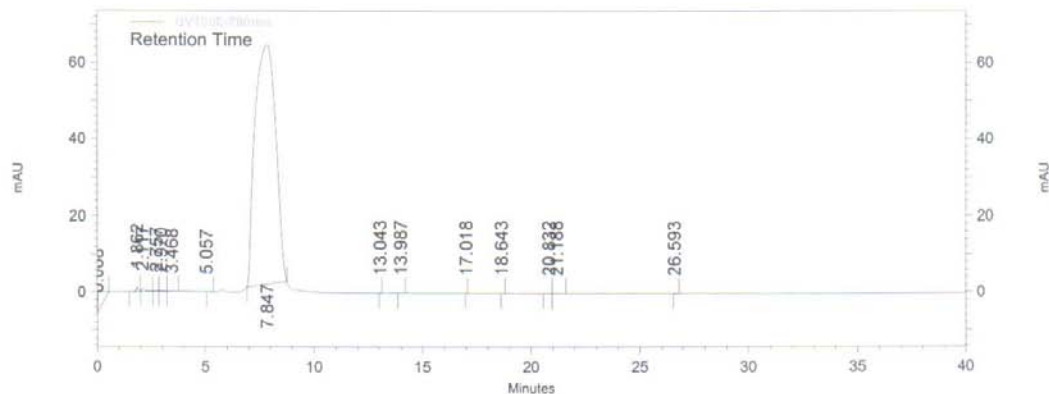

UV1000-280nm  
Results (System  
(5/1/2006  
1:13:14 PM)  
(Reprocessed))

| Name | Retention Time | Area    | Area Percent | Integration Codes |
|------|----------------|---------|--------------|-------------------|
|      | 0.008          | 82148   | 1.941        | MM                |
|      | 1.862          | 8225    | 0.194        | BV                |
|      | 2.117          | 11056   | 0.261        | VD                |
|      | 2.757          | 3512    | 0.083        | VV                |
|      | 2.970          | 2888    | 0.068        | VV                |
|      | 3.468          | 737     | 0.017        | VD                |
|      | 5.057          | 307     | 0.007        | MM                |
|      | 7.847          | 4122572 | 97.404       | MM                |
|      | 13.043         | 80      | 0.002        | BB                |
|      | 13.987         | 413     | 0.010        | BB                |
|      | 17.018         | 51      | 0.001        | BD                |
|      | 18.643         | 132     | 0.003        | BB                |
|      | 20.832         | 71      | 0.002        | MM                |
|      | 21.188         | 56      | 0.001        | MM                |
|      | 26.593         | 195     | 0.005        | BB                |

Normal Phase (Method EtOAc:Hx:AcOH 25:75:0.2, Flow rate 1mL/min)

**Area Percent Report**

Page 1 of 1

Data File: D:\DWKIM\dwk-ii-87np-4.dat

Acquired: 5/11/2006 10:45:40 AM

Printed: 05/11/2006

11:57:24 AM

Analyst: System

Sample ID: dwk-ii-87

Vial: N/A

Injection Volume: 0

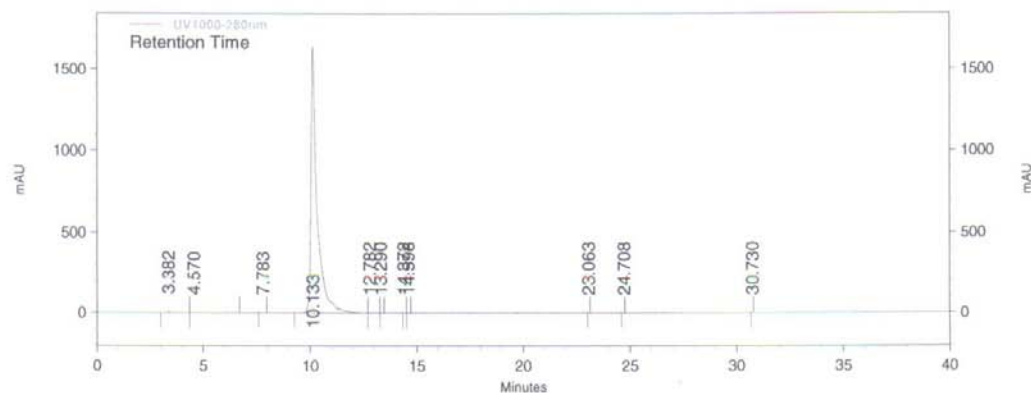

UV1000-280nm  
Results (System  
5/11/2006  
11:57:16 AM)  
(Reprocessed))

| Name | Retention Time | Area     | Area Percent | Integration Codes |
|------|----------------|----------|--------------|-------------------|
|      | 3.382          | 53641    | 0.162        | BD                |
|      | 4.570          | 19388    | 0.058        | VD                |
|      | 7.783          | 615      | 0.002        | BB                |
|      | 10.133         | 33081151 | 99.746       | BD                |
|      | 12.782         | 9968     | 0.030        | VV                |
|      | 13.290         | 235      | 0.001        | VB                |
|      | 14.372         | 124      | 0.000        | BV                |
|      | 14.598         | 131      | 0.000        | VB                |
|      | 23.063         | 54       | 0.000        | BD                |
|      | 24.708         | 106      | 0.000        | BB                |
|      | 30.730         | 69       | 0.000        | BB                |

|        |  |          |         |  |
|--------|--|----------|---------|--|
| Totals |  | 33165482 | 100.000 |  |
|--------|--|----------|---------|--|

**(E)-7-[4-[Bicyclo[3.3.1]non-9-ylidene(4-hydroxyphenyl)methyl]phenyl]hept-6-enoic acid (25).**

**Reverse Phase** (Method H<sub>2</sub>O:MeOH:AcOH 10:90:0.1, Flow rate 1mL/min)

**Area Percent Report**

Page 1 of 1

Data File: D:\DWKIM\dwk-ii-85-4.dat

Acquired: 4/20/2006 5:01:57 PM

Printed: 04/20/2006

05:42:18 PM

Analyst: System

Sample ID: dwk-ii-85

Vial: N/A

Injection Volume: 0

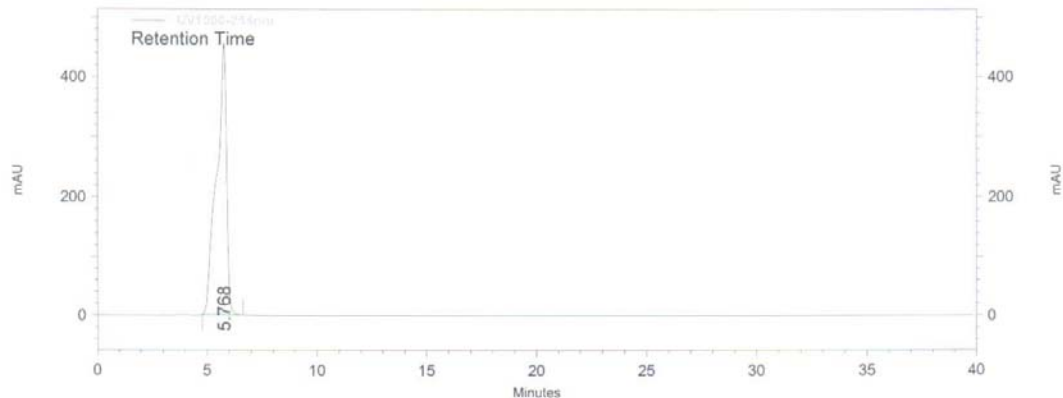

UV1000-254nm

Results (System

(4/20/2006

5:42:09 PM)

(Reprocessed)

(Aborted Run))

| Name          | Retention Time | Area     | Area Percent | Integration Codes |
|---------------|----------------|----------|--------------|-------------------|
|               | 5.768          | 14330803 | 100.000      | BB                |
| <b>Totals</b> |                |          |              |                   |
|               |                | 14330803 | 100.000      |                   |

Normal Phase (Method EtOAc:Hx:AcOH 25:75:0.2, Flow rate 1mL/min)

**Area Percent Report**

Page 1 of 1

Data File: D:\DWKIM\dwk-ii-85np-2.dat

Acquired: 5/10/2006 10:15:58 PM

10:46:50 PM

Printed: 05/10/2006

Analyst: System

Sample ID: dwk-ii-85

Vial: N/A

Injection Volume: 0

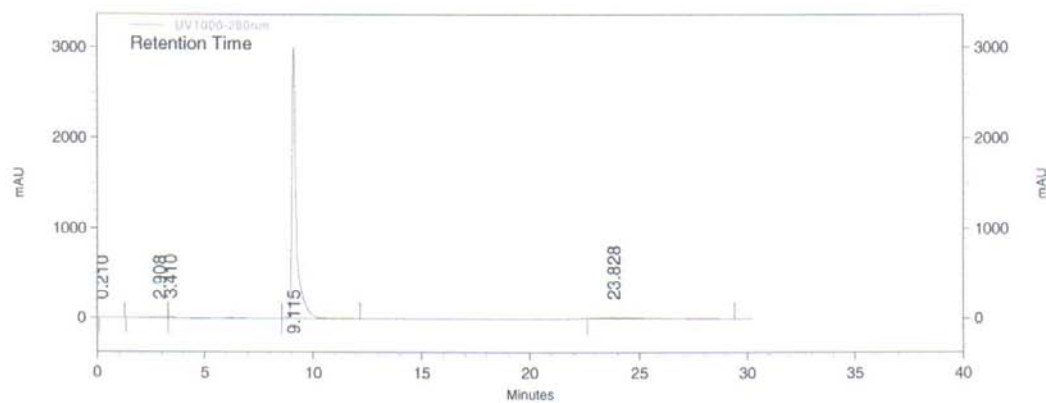

UV1000-280nm  
 Results (System  
 (5/10/2006  
 10:46:13 PM)  
 (Reprocessed)  
 (Aborted Run))

| Name | Retention Time | Area     | Area Percent | Integration Codes |
|------|----------------|----------|--------------|-------------------|
|      | 0.210          | 7470     | 0.016        | BD                |
|      | 2.908          | 429139   | 0.946        | BD                |
|      | 3.410          | 547726   | 1.207        | VD                |
|      | 9.115          | 43415673 | 95.663       | BD                |
|      | 23.828         | 984085   | 2.168        | BD                |

|        |  |          |         |  |
|--------|--|----------|---------|--|
| Totals |  | 45384093 | 100.000 |  |
|--------|--|----------|---------|--|

**Methyl hydrogen 4-[bicyclo[3.3.1]non-9-ylidene(4-hydroxyphenyl)methyl]styrylphosphonate (26).**

**Reverse Phase** (Method H<sub>2</sub>O:MeOH:AcOH 10:90:0.2, Flow rate 1mL/min)

**Area Percent Report**

Page 1 of 2

Data File: D:\DWKIM\dwk-i-259rp.dat

Acquired: 5/3/2006 2:45:50 PM

Printed: 05/22/2006 03:15:12

AM

Analyst: System

Sample ID: dwk-i-259

Vial: N/A

Injection Volume: 0

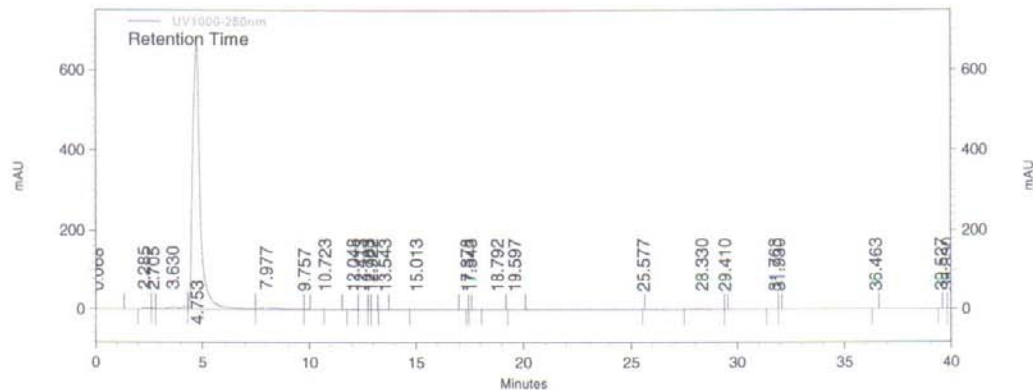

UV1000-280nm  
 Results (System  
 (5/3/2006  
 3:33:11 PM)  
 (Reprocessed)  
 (Aborted Run))

| Name | Retention Time | Area     | Area Percent | Integration Codes |
|------|----------------|----------|--------------|-------------------|
|      | 0.068          | 1085     | 0.006        | BD                |
|      | 2.285          | 86461    | 0.516        | BD                |
|      | 2.705          | 29120    | 0.174        | VV                |
|      | 3.630          | 300808   | 1.795        | VD                |
|      | 4.753          | 15986247 | 95.378       | VD                |
|      | 7.977          | 262738   | 1.568        | VV                |
|      | 9.757          | 1274     | 0.008        | VB                |
|      | 10.723         | 50       | 0.000        | BD                |
|      | 12.048         | 5494     | 0.033        | BV                |
|      | 12.413         | 3286     | 0.020        | VV                |
|      | 12.783         | 89       | 0.001        | VB                |
|      | 12.922         | 254      | 0.002        | BB                |
|      | 13.543         | 566      | 0.003        | BB                |
|      | 15.013         | 12268    | 0.073        | BD                |

**Normal Phase** (Method EtOAc:Hx:AcOH 20:79:1.0, Flow rate 1mL/min)

**Area Percent Report**

Page 1 of 1

Data File: D:\DWKIM\dwk-i-259-np.dat  
 Acquired: 4/19/2006 11:35:37 AM  
 03:16:37 AM

Printed: 05/22/2006

Analyst: System  
 Sample ID: test-13

Vial: N/A

Injection Volume: 0

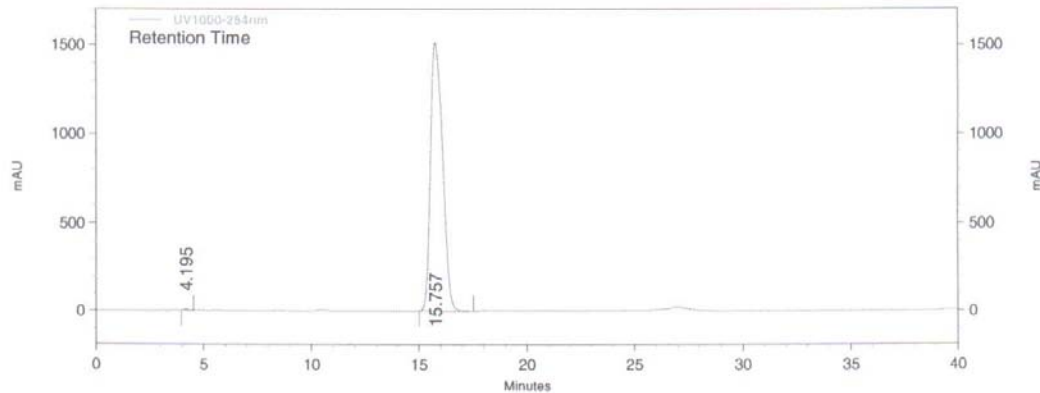

UV1000-254nm  
 Results (System  
 (4/19/2006  
 1:03:36 PM)  
 (Reprocessed))

| Name          | Retention Time | Area     | Area Percent | Integration Codes |
|---------------|----------------|----------|--------------|-------------------|
|               | 4.195          | 146713   | 0.246        | BB                |
|               | 15.757         | 59566058 | 99.754       | BB                |
| <b>Totals</b> |                |          |              |                   |
|               |                | 59712771 | 100.000      |                   |



**Ethyl 6-[4-[bicyclo[3.3.1]non-9-ylidene(4-hydroxyphenyl)methyl]phenoxy]hexanoate (29).**

**Reverse Phase** (Method H<sub>2</sub>O:MeOH:AcOH 5:95:0.1, Flow rate 1mL/min)

**Area Percent Report**

Page 1 of 2

Data File: D:\DWKIM\dwk-ii-35p-1.dat  
 Acquired: 5/4/2006 9:16:14 PM  
 AM

Printed: 05/22/2006 03:06:33

Analyst: System  
 Sample ID: dwk-ii-35

Vial: N/A

Injection Volume: 0

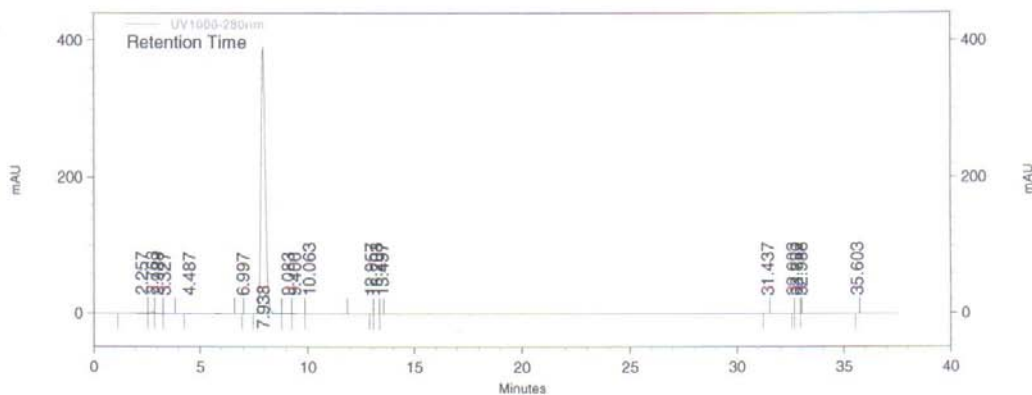

UV1000-280nm  
 Results (System  
 (5/4/2006  
 9:53:51 PM)  
 (Reprocessed)  
 (Aborted Run))

| Name | Retention Time | Area    | Area Percent | Integration Codes |
|------|----------------|---------|--------------|-------------------|
|      | 2.257          | 35276   | 0.632        | BD                |
|      | 2.763          | 18563   | 0.333        | VV                |
|      | 2.988          | 7404    | 0.133        | VV                |
|      | 3.327          | 2279    | 0.041        | VD                |
|      | 4.487          | 18228   | 0.327        | BD                |
|      | 6.997          | 40      | 0.001        | BB                |
|      | 7.938          | 5478263 | 98.127       | BV                |
|      | 9.083          | 10999   | 0.197        | VV                |
|      | 9.400          | 7870    | 0.141        | VB                |
|      | 10.063         | 2598    | 0.047        | BD                |
|      | 12.957         | 115     | 0.002        | BB                |
|      | 13.203         | 266     | 0.005        | BV                |
|      | 13.497         | 121     | 0.002        | VB                |
|      | 31.437         | 242     | 0.004        | BD                |

Normal Phase (Method EtOAc:Hx:AcOH 25:75:0.2, Flow rate 1mL/min)

**Area Percent Report**

Page 1 of 2

Data File: D:\DWKIM\dwk-ii-35-np.dat

Acquired: 5/8/2006 3:09:04 PM

PM

Printed: 05/08/2006 03:39:31

Analyst: System

Sample ID: dwk-ii-35

Vial: N/A

Injection Volume: 0

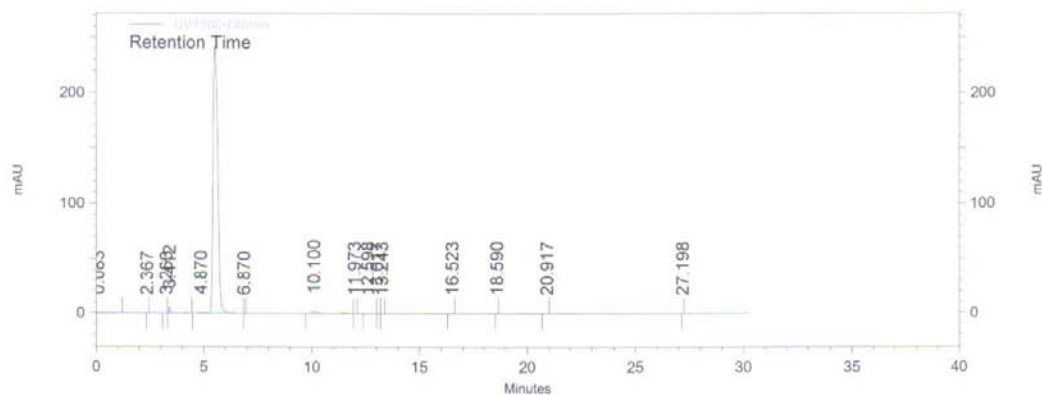

UV1000-280nm

Results (System

5/8/2006

3:39:25 PM)

(Reprocessed)

(Aborted Run))

| Name | Retention Time | Area    | Area Percent | Integration Codes |
|------|----------------|---------|--------------|-------------------|
|      | 0.083          | 21229   | 0.566        | BD                |
|      | 2.367          | 43      | 0.001        | BD                |
|      | 3.263          | 873     | 0.023        | BB                |
|      | 3.412          | 24969   | 0.666        | BD                |
|      | 4.870          | 3659222 | 97.642       | BD                |
|      | 6.870          | 69      | 0.002        | VB                |
|      | 10.100         | 37739   | 1.007        | BD                |
|      | 11.973         | 281     | 0.007        | VB                |
|      | 12.598         | 2237    | 0.060        | BV                |
|      | 13.017         | 214     | 0.006        | VV                |
|      | 13.243         | 107     | 0.003        | VB                |
|      | 16.523         | 146     | 0.004        | BD                |
|      | 18.590         | 126     | 0.003        | BB                |
|      | 20.917         | 277     | 0.007        | BD                |

**4-[4-[Bicyclo[3.3.1]non-9-ylidene(4-hydroxyphenyl)methyl]phenoxy]butanoic acid (32).****Reverse Phase** (Method H<sub>2</sub>O:MeOH:AcOH 10:90:0.1, Flow rate 1mL/min)**Area Percent Report**

Page 1 of 2

Data File: D:\DWKIM\dwk-ii-253-rp.dat

Acquired: 4/28/2006 11:53:14 AM

12:54:19 PM

Printed: 04/28/2006

Analyst: System

Sample ID: dwk-ii-253

Vial: N/A

Injection Volume: 0

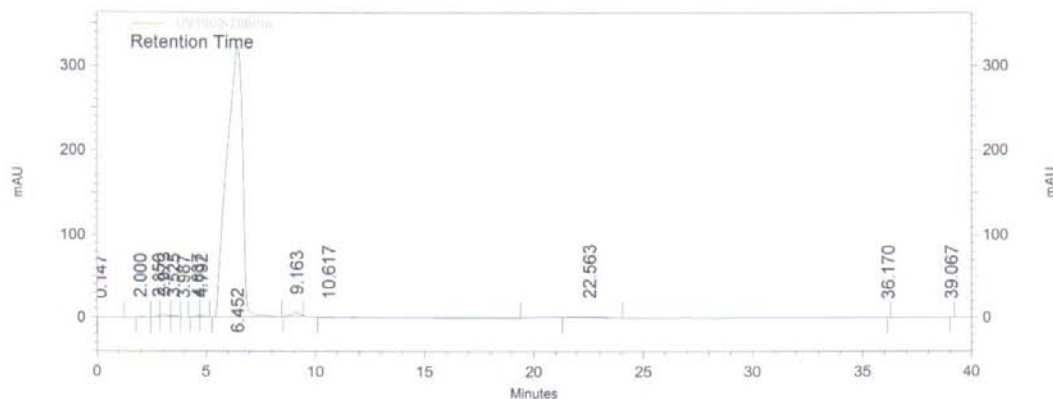

UV1000-280nm  
 Results (System  
 (4/28/2006  
 12:53:59 PM)  
 (Reprocessed))

| Name | Retention Time | Area     | Area Percent | Integration Codes |
|------|----------------|----------|--------------|-------------------|
|      | 0.147          | 1931     | 0.012        | BD                |
|      | 2.000          | 8807     | 0.053        | BD                |
|      | 2.850          | 14500    | 0.088        | VV                |
|      | 3.073          | 63232    | 0.383        | VV                |
|      | 3.525          | 23963    | 0.145        | VV                |
|      | 3.987          | 1507     | 0.009        | VD                |
|      | 4.637          | 17483    | 0.106        | BV                |
|      | 4.792          | 17852    | 0.108        | VB                |
|      | 6.452          | 16098807 | 97.631       | BB                |
|      | 9.163          | 124309   | 0.754        | MM                |
|      | 10.617         | 48974    | 0.297        | BD                |
|      | 22.563         | 67917    | 0.412        | BD                |
|      | 36.170         | 93       | 0.001        | BB                |
|      | 39.067         | 137      | 0.001        | BB                |

Normal Phase (Method EtOAc:Hx:AcOH 25:75:0.2, Flow rate 1mL/min)

### Area Percent Report

Page 1 of 2

Data File: D:\DWKIM\dwk-i-253-np-1.dat  
 Acquired: 5/8/2006 2:25:43 PM  
 PM

Printed: 05/08/2006 03:07:40

Analyst: System

Sample ID: dwk-i-253

Vial: N/A

Injection Volume: 0

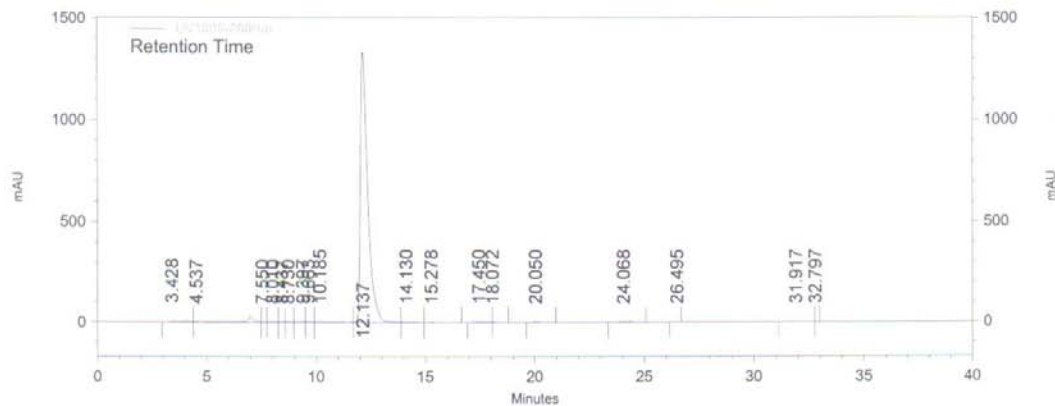

UV1000-280nm  
 Results (System  
 (5/8/2006  
 3:07:34 PM)  
 (Reprocessed)  
 (Aborted Run))

| Name | Retention Time | Area     | Area Percent | Integration Codes |
|------|----------------|----------|--------------|-------------------|
|      | 3.428          | 151528   | 0.473        | BD                |
|      | 4.537          | 571285   | 1.783        | VD                |
|      | 7.550          | 9371     | 0.029        | VV                |
|      | 8.010          | 22740    | 0.071        | VV                |
|      | 8.437          | 16431    | 0.051        | VV                |
|      | 8.730          | 16788    | 0.052        | VV                |
|      | 9.397          | 35304    | 0.110        | VV                |
|      | 9.663          | 39544    | 0.123        | VV                |
|      | 10.185         | 81140    | 0.253        | VD                |
|      | 12.137         | 30876296 | 96.341       | VV                |
|      | 14.130         | 52282    | 0.163        | VV                |
|      | 15.278         | 18353    | 0.057        | VD                |
|      | 17.450         | 71041    | 0.222        | BV                |
|      | 18.072         | 7209     | 0.022        | VB                |

**5-[4-[Bicyclo[3.3.1]non-9-ylidene(4-hydroxyphenyl)methyl]phenoxy]pentanoic acid (33).**

**Reverse Phase** (Method H<sub>2</sub>O:MeOH:AcOH 10:90:0.1, Flow rate 1mL/min)

**Area Percent Report**

Page 1 of 2

Data File: D:\DWKIM\dwk-ii-33-rp-1.dat

Acquired: 4/28/2006 11:08:11 AM

Printed: 04/28/2006

11:51:34 AM

Analyst: System

Sample ID: dwk-ii-33

Vial: N/A

Injection Volume: 0

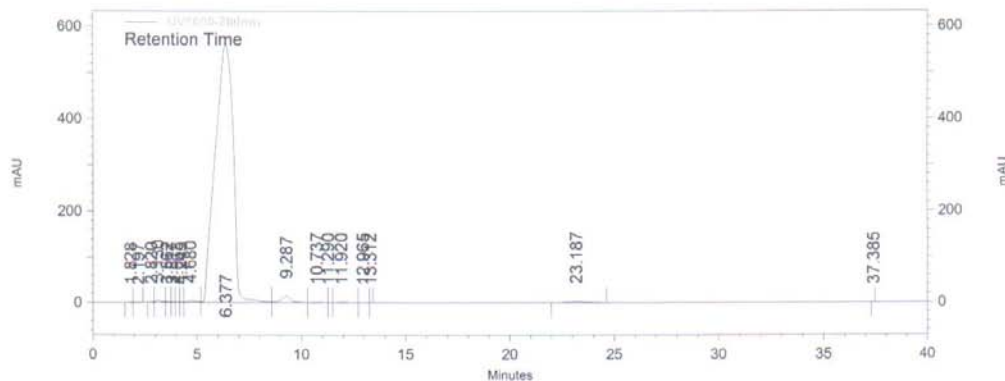

UV1000-280nm  
 Results (System  
 (4/28/2006  
 11:51:30 AM)  
 (Reprocessed))

| Name | Retention Time | Area     | Area Percent | Integration Codes |
|------|----------------|----------|--------------|-------------------|
|      | 1.828          | 3276     | 0.010        | BV                |
|      | 2.197          | 2918     | 0.008        | VB                |
|      | 2.820          | 15017    | 0.044        | BV                |
|      | 3.130          | 94719    | 0.275        | VV                |
|      | 3.562          | 26909    | 0.078        | VV                |
|      | 3.817          | 13092    | 0.038        | VV                |
|      | 4.063          | 12137    | 0.035        | VV                |
|      | 4.245          | 11248    | 0.033        | VV                |
|      | 4.680          | 121223   | 0.352        | VV                |
|      | 6.377          | 33409500 | 97.101       | VV                |
|      | 9.287          | 474127   | 1.378        | VV                |
|      | 10.737         | 32151    | 0.093        | VV                |
|      | 11.290         | 2938     | 0.009        | VV                |
|      | 11.920         | 27697    | 0.080        | VV                |
|      | 12.965         | 2903     | 0.008        | VV                |
|      | 13.312         | 154      | 0.000        | VB                |

Normal Phase (Method EtOAc:Hx:AcOH 25:75:0.2, Flow rate 1mL/min)

**Area Percent Report**

Page 1 of 2

Data File: D:\DWKIM\dwk-ii-33-np-1.dat

Acquired: 5/9/2006 9:14:21 AM

Printed: 05/09/2006 09:57:29

AM

Analyst: System

Sample ID: dwk-ii-33

Vial: N/A

Injection Volume: 0

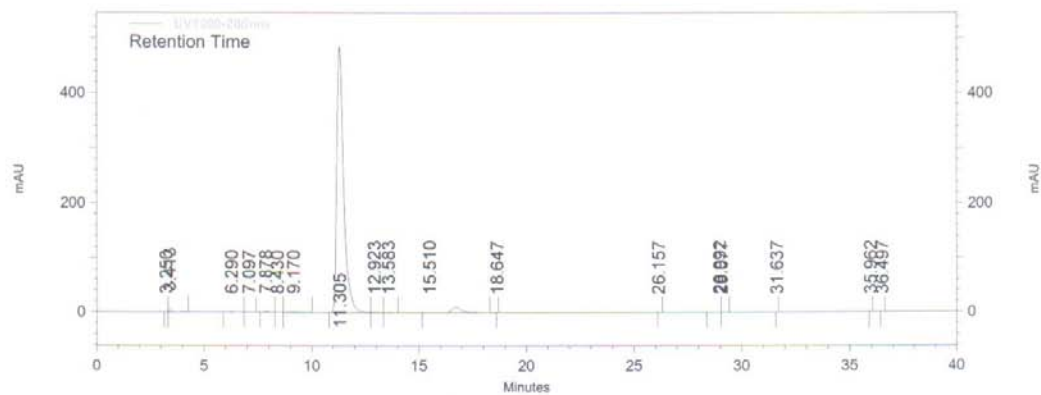

UV1000-280nm  
 Results (System  
 5/9/2006  
 9:57:21 AM)  
 (Reprocessed)  
 (Aborted Run))

| Name | Retention Time | Area     | Area Percent | Integration Codes |
|------|----------------|----------|--------------|-------------------|
|      | 3.250          | 403      | 0.004        | BD                |
|      | 3.413          | 14232    | 0.128        | BD                |
|      | 6.290          | 11496    | 0.104        | BD                |
|      | 7.097          | 4347     | 0.039        | VB                |
|      | 7.878          | 17499    | 0.158        | BV                |
|      | 8.430          | 1498     | 0.013        | VV                |
|      | 9.170          | 20287    | 0.183        | VB                |
|      | 11.305         | 10719772 | 96.581       | BD                |
|      | 12.923         | 8363     | 0.075        | VV                |
|      | 13.583         | 4495     | 0.040        | VB                |
|      | 15.510         | 290777   | 2.620        | BD                |
|      | 18.647         | 57       | 0.001        | BB                |
|      | 26.157         | 137      | 0.001        | BD                |
|      | 28.992         | 3763     | 0.034        | BV                |

**6-[4-[Bicyclo[3.3.1]non-9-ylidene(4-hydroxyphenyl)methyl]phenoxy]hexanoic acid (34).**

**Reverse Phase** (Method H<sub>2</sub>O:MeOH:AcOH 10:90:0.1, Flow rate 1mL/min)

**Area Percent Report**

Page 1 of 2

Data File: D:\DWKIM\dwk-ii-43-rp-2.dat  
 Acquired: 4/27/2006 9:41:28 PM  
 09:01:57 AM

Printed: 04/28/2006

Analyst: System

Sample ID: dwk-ii-43

Vial: N/A

Injection Volume: 0

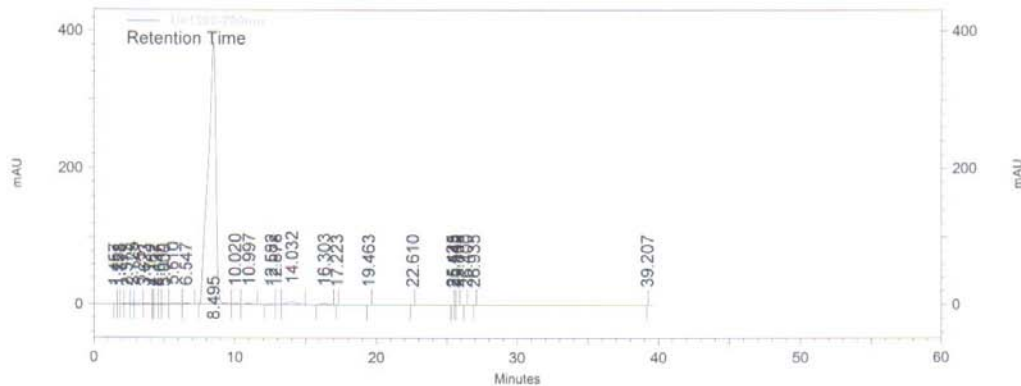

UV1000-280nm  
 Results (System  
 (4/27/2006  
 10:22:08 PM)  
 (Reprocessed)  
 (Aborted Run))

| Name | Retention Time | Area     | Area Percent | Integration Codes |
|------|----------------|----------|--------------|-------------------|
|      | 1.457          | 916      | 0.006        | BV                |
|      | 1.758          | 3012     | 0.020        | VV                |
|      | 1.873          | 5984     | 0.039        | VV                |
|      | 2.373          | 15829    | 0.103        | VV                |
|      | 2.725          | 20371    | 0.133        | VB                |
|      | 3.257          | 62192    | 0.406        | BV                |
|      | 3.623          | 32049    | 0.209        | VV                |
|      | 4.162          | 4089     | 0.027        | VV                |
|      | 4.437          | 13057    | 0.085        | VV                |
|      | 4.645          | 7322     | 0.048        | VV                |
|      | 5.000          | 14942    | 0.098        | VV                |
|      | 5.610          | 53034    | 0.346        | VV                |
|      | 6.547          | 33876    | 0.221        | VB                |
|      | 8.495          | 14754225 | 96.357       | BV                |

**Normal Phase** (Method EtOAc:Hx:AcOH 25:75:0.2, Flow rate 1mL/min)

**Area Percent Report**

Page 1 of 2

Data File: D:\DWKIM\dwk-ii-43-np.dat  
 Acquired: 5/9/2006 9:59:05 AM  
 AM

Printed: 05/09/2006 10:32:15

Analyst: System

Sample ID: dwk-ii-43

Vial: N/A

Injection Volume: 0

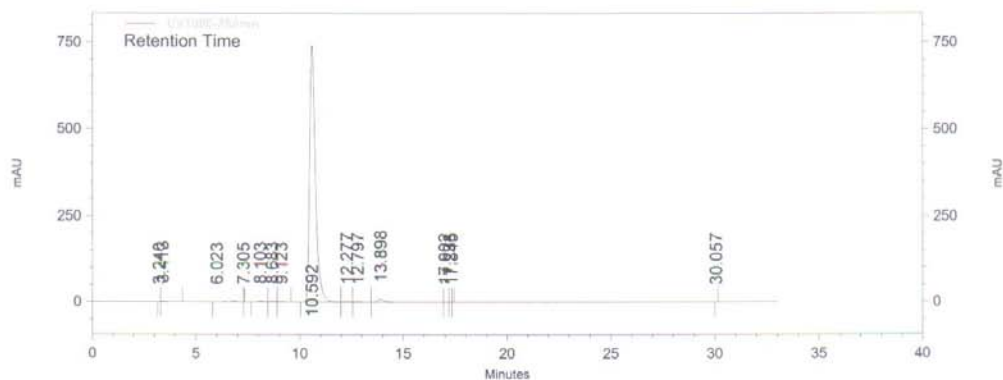

UV1000-280nm  
 Results (System  
 5/9/2006  
 10:32:10 AM)  
 (Reprocessed)  
 (Aborted Run))

| Name | Retention Time | Area     | Area Percent | Integration Codes |
|------|----------------|----------|--------------|-------------------|
|      | 3.240          | 248      | 0.002        | BD                |
|      | 3.413          | 12522    | 0.084        | BD                |
|      | 6.023          | 67940    | 0.453        | BD                |
|      | 7.305          | 56       | 0.000        | VB                |
|      | 8.103          | 34177    | 0.228        | BV                |
|      | 8.683          | 27731    | 0.185        | VV                |
|      | 9.123          | 24141    | 0.161        | VB                |
|      | 10.592         | 14570342 | 97.201       | BD                |
|      | 12.277         | 31013    | 0.207        | VV                |
|      | 12.797         | 34176    | 0.228        | VV                |
|      | 13.898         | 186078   | 1.241        | VD                |
|      | 17.002         | 1058     | 0.007        | VV                |
|      | 17.233         | 313      | 0.002        | VV                |
|      | 17.345         | 126      | 0.001        | VB                |



## 7-[4-[Bicyclo[3.3.1]non-9-ylidene(4-hydroxyphenyl)methyl]phenoxy]heptanoic acid (35).

Reverse Phase (Method H<sub>2</sub>O:MeOH:AcOH 10:90:0.1, Flow rate 1mL/min)

## Area Percent Report

Page 1 of 2

Data File: D:\DWKIM\dwk-ii-63-rp.dat

Acquired: 4/28/2006 9:52:21 AM

Printed: 04/28/2006

10:41:28 AM

Analyst: System

Sample ID: dwk-ii-63

Vial: N/A

Injection Volume: 0

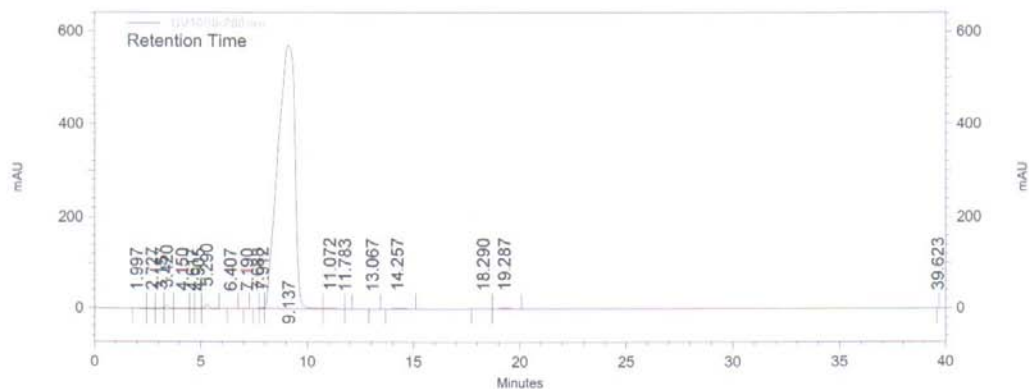

UV1000-280nm

Results (System

(4/28/2006

10:41:23 AM)

(Reprocessed)

(Aborted Run))

| Name | Retention Time | Area     | Area Percent | Integration Codes |
|------|----------------|----------|--------------|-------------------|
|      | 1.997          | 13125    | 0.041        | BV                |
|      | 2.727          | 26108    | 0.081        | VB                |
|      | 3.157          | 32949    | 0.102        | BV                |
|      | 3.420          | 87442    | 0.271        | VV                |
|      | 4.150          | 35715    | 0.111        | VV                |
|      | 4.617          | 6725     | 0.021        | VV                |
|      | 4.905          | 8456     | 0.026        | VV                |
|      | 5.290          | 124958   | 0.387        | VB                |
|      | 6.407          | 1183     | 0.004        | BB                |
|      | 7.190          | 329      | 0.001        | BB                |
|      | 7.688          | 6375     | 0.020        | BV                |
|      | 7.912          | 28579    | 0.088        | VV                |
|      | 9.137          | 31790074 | 98.370       | VV                |
|      | 11.072         | 47221    | 0.146        | VV                |

Normal Phase (Method EtOAc:Hx:AcOH 25:75:0.2, Flow rate 1mL/min)

## Area Percent Report

Page 1 of 2

Data File: D:\DWKIM\dwk-ii-63-np-2.dat

Acquired: 5/8/2006 12:32:26 PM

Printed: 05/08/2006

01:12:22 PM

Analyst: System

Sample ID: dwk-ii-63

Vial: N/A

Injection Volume: 0

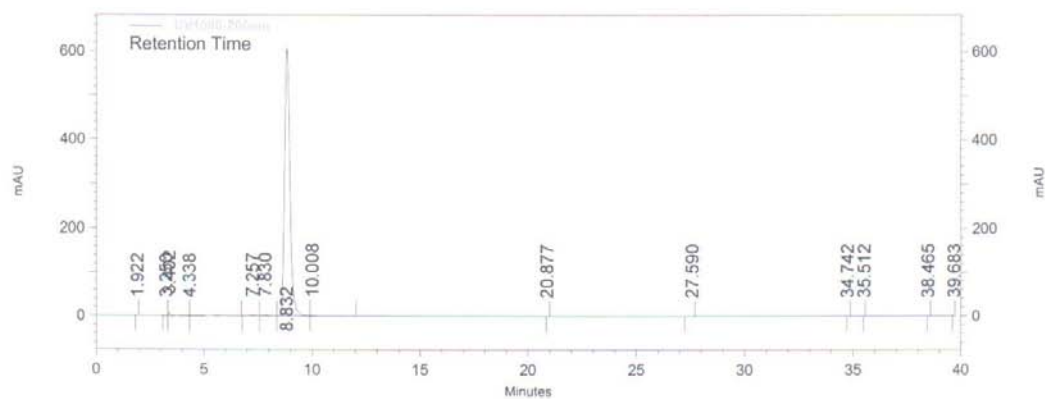

UV1000-280nm  
Results (System  
(5/8/2006  
1:12:15 PM)  
(Reprocessed)  
(Aborted Run))

| Name | Retention Time | Area     | Area Percent | Integration Codes |
|------|----------------|----------|--------------|-------------------|
|      | 1.922          | 115      | 0.001        | BD                |
|      | 3.250          | 1485     | 0.014        | BD                |
|      | 3.402          | 17593    | 0.166        | BD                |
|      | 4.338          | 23444    | 0.221        | VD                |
|      | 7.257          | 32096    | 0.303        | BV                |
|      | 7.830          | 37014    | 0.349        | VV                |
|      | 8.832          | 10462241 | 98.649       | VV                |
|      | 10.008         | 30691    | 0.289        | VD                |
|      | 20.877         | 110      | 0.001        | BD                |
|      | 27.590         | 428      | 0.004        | BB                |
|      | 34.742         | 98       | 0.001        | BB                |
|      | 35.512         | 56       | 0.001        | BB                |
|      | 38.465         | 104      | 0.001        | BB                |
|      | 39.683         | 56       | 0.001        | BE                |

**11-[4-[bicyclo[3.3.1]non-9-ylidene(4-hydroxyphenyl)methyl]phenoxy]nudecanoic acid (36).**

**Reverse Phase** (Method H<sub>2</sub>O:MeOH:AcOH 5:95:0.1, Flow rate 1mL/min)

**Area Percent Report**

Page 1 of 2

Data File: D:\DWKIM\dwk-ii-73rp-6.dat  
 Acquired: 5/4/2006 2:58:12 PM  
 PM

Printed: 05/04/2006 03:43:39

Analyst: System

Sample ID: dwk-ii-73

Vial: N/A

Injection Volume: 0

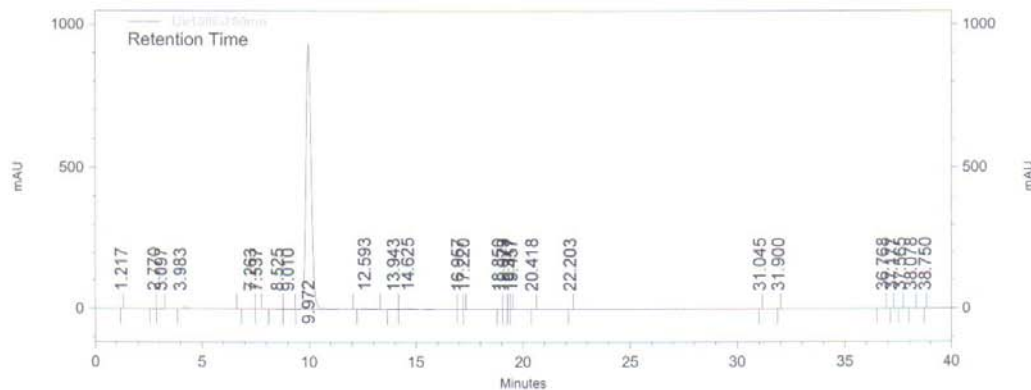

UV1000-280nm  
 Results (System)  
 (5/4/2006  
 3:43:33 PM)  
 (Reprocessed)  
 (Aborted Run))

| Name | Retention Time | Area     | Area Percent | Integration Codes |
|------|----------------|----------|--------------|-------------------|
|      | 1.217          | 73       | 0.000        | BD                |
|      | 2.770          | 8868     | 0.055        | BD                |
|      | 3.097          | 5335     | 0.033        | BB                |
|      | 3.983          | 108462   | 0.669        | BD                |
|      | 7.263          | 4369     | 0.027        | BV                |
|      | 7.537          | 965      | 0.006        | VB                |
|      | 8.525          | 2980     | 0.018        | BV                |
|      | 9.010          | 2941     | 0.018        | VB                |
|      | 9.972          | 15924817 | 98.252       | BD                |
|      | 12.593         | 62412    | 0.385        | BB                |
|      | 13.943         | 3225     | 0.020        | BV                |
|      | 14.625         | 80567    | 0.497        | VD                |
|      | 16.957         | 1063     | 0.007        | VV                |
|      | 17.220         | 82       | 0.001        | VB                |

Normal Phase (Method EtOAc:Hx:AcOH 25:75:0.2, Flow rate 1mL/min)

**Area Percent Report**

Page 1 of 2

Data File: D:\DWKIM\dwk-ii-73-np.dat  
 Acquired: 5/8/2006 3:40:33 PM  
 PM

Printed: 05/08/2006 04:28:19

Analyst: System

Sample ID: dwk-ii-73

Vial: N/A

Injection Volume: 0

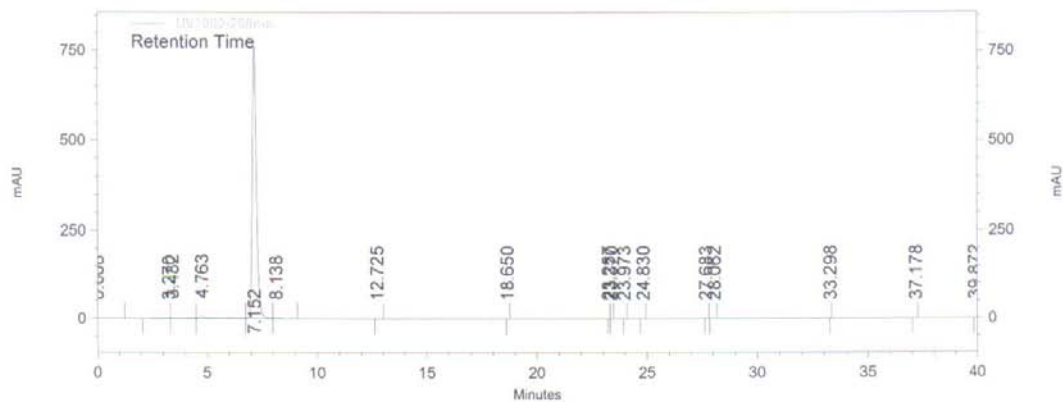

UV1000-280nm  
 Results (System)  
 (5/8/2006  
 4:28:11 PM)  
 (Reprocessed)  
 (Aborted Run)

| Name | Retention Time | Area     | Area Percent | Integration Codes |
|------|----------------|----------|--------------|-------------------|
|      | 0.008          | 2866     | 0.028        | BD                |
|      | 3.270          | 14452    | 0.139        | BD                |
|      | 3.432          | 59622    | 0.574        | VD                |
|      | 4.763          | 219460   | 2.114        | VD                |
|      | 7.152          | 10048538 | 96.813       | VV                |
|      | 8.138          | 32687    | 0.315        | VB                |
|      | 12.725         | 505      | 0.005        | BD                |
|      | 18.650         | 95       | 0.001        | BD                |
|      | 23.257         | 46       | 0.000        | BD                |
|      | 23.370         | 65       | 0.001        | VB                |
|      | 23.973         | 123      | 0.001        | BB                |
|      | 24.830         | 207      | 0.002        | BB                |
|      | 27.683         | 108      | 0.001        | BB                |
|      | 28.062         | 221      | 0.002        | BB                |

**(E)-3-[4-[cyclohexylidene(4-hydroxyphenyl)methyl]phenyl]acrylic acid (42).**

**Reverse Phase** (Method H<sub>2</sub>O:MeOH:AcOH 20:80:0.1, Flow rate 1mL/min)

**Area Percent Report**

Page 1 of 2

Data File: D:\DWKIM\dwk-i-207rp-1.dat

Acquired: 5/3/2006 11:36:05 AM

Printed: 05/22/2006

03:21:12 AM

Analyst: System

Sample ID: dwk-i-207

Vial: N/A

Injection Volume: 0

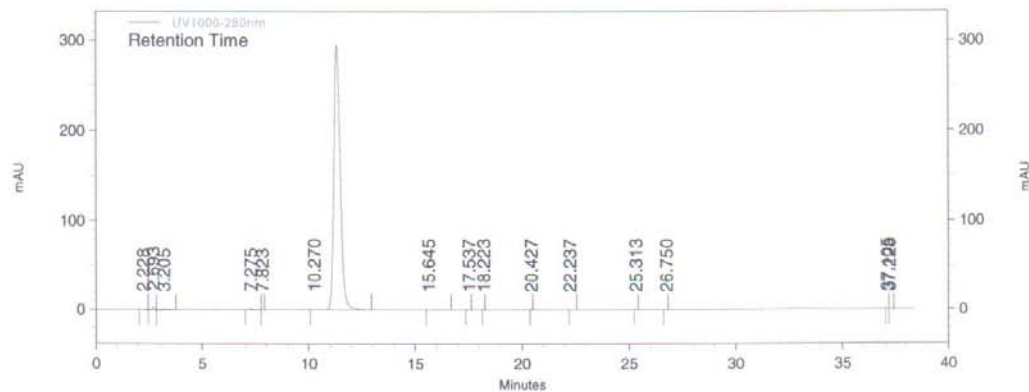

UV1000-280nm  
 Results (System  
 5/3/2006  
 12:14:47 PM)  
 (Reprocessed)  
 (Aborted Run)

| Name | Retention Time | Area    | Area Percent | Integration Codes |
|------|----------------|---------|--------------|-------------------|
|      | 2.228          | 8710    | 0.139        | BD                |
|      | 2.693          | 33609   | 0.538        | VB                |
|      | 3.205          | 32598   | 0.521        | BD                |
|      | 7.275          | 12333   | 0.197        | BD                |
|      | 7.823          | 128     | 0.002        | VB                |
|      | 10.270         | 6163427 | 98.572       | BD                |
|      | 15.645         | 668     | 0.011        | BD                |
|      | 17.537         | 308     | 0.005        | BB                |
|      | 18.223         | 97      | 0.002        | BB                |
|      | 20.427         | 60      | 0.001        | BD                |
|      | 22.237         | 217     | 0.003        | BB                |
|      | 25.313         | 136     | 0.002        | BB                |
|      | 26.750         | 182     | 0.003        | BB                |
|      | 37.105         | 120     | 0.002        | BB                |

Normal Phase (Method *i*-PrOH:CH<sub>2</sub>Cl<sub>2</sub>:Hx:AcOH 5:35:60:0.5, Flow rate 1mL/min)

### Area Percent Report

Page 1 of 1

Data File: D:\DWKIM\dwk-i-209np.dat

Acquired: 5/13/2006 5:06:37 PM

Printed: 05/22/2006

03:21:27 AM

Analyst: System

Sample ID: dwk-i-209

Vial: N/A

Injection Volume: 0

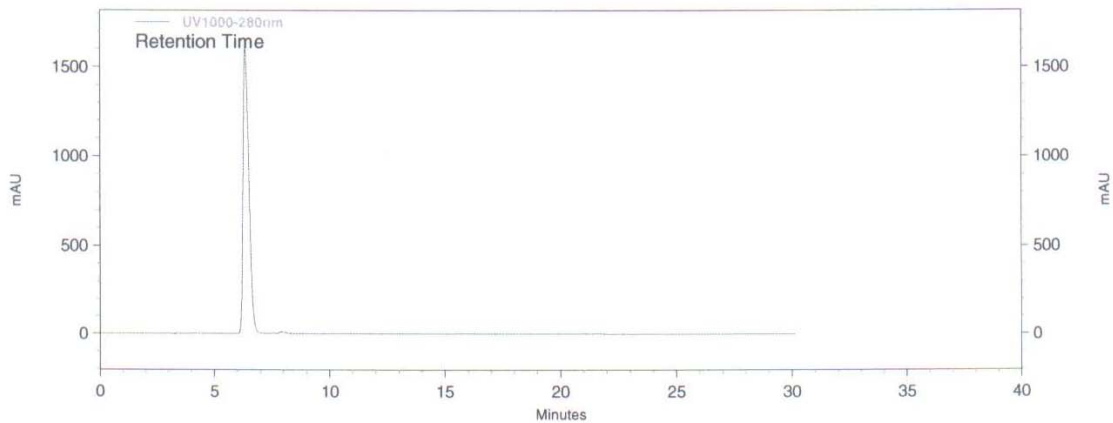

Area percent : >99%

**6-[4-[cyclohexylidene(4-hydroxyphenyl)methyl]phenoxy]hexanoic acid (43).**

**Reverse Phase** (Method H<sub>2</sub>O:MeOH:AcOH 10:90:0.1, Flow rate 1mL/min)

**Area Percent Report**

Page 1 of 1

Data File: D:\DWKIM\test-4.dat  
 Acquired: 4/17/2006 1:08:12 PM  
 03:23:13 AM

*DWK-ii-97-rp*

Printed: 05/22/2006

Analyst: System

Sample ID: test-4 *DWK-ii-97*

Vial: N/A

Injection Volume: 0

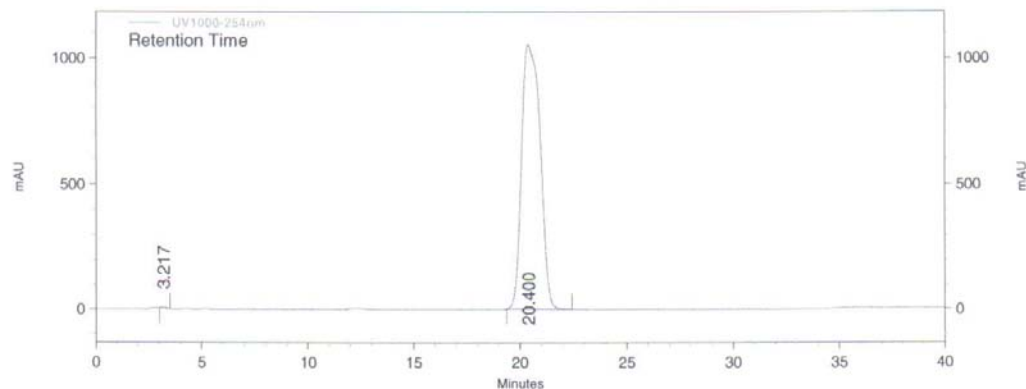

UV1000-254nm  
 Results (System  
 (4/17/2006  
 1:53:17 PM)  
 (Reprocessed))

| Name   | Retention Time | Area     | Area Percent | Integration Codes |
|--------|----------------|----------|--------------|-------------------|
|        | 3.217          | 93796    | 0.148        | BB                |
|        | 20.400         | 63447438 | 99.852       | BB                |
| Totals |                | 63541234 | 100.000      |                   |

Normal Phase (Method EtOAc:Hx:AcOH 25:75:0.2, Flow rate 1mL/min)

Area Percent Report

Page 1 of 2

Data File: D:\DWKIM\dwk-ii-97-np.dat

Acquired: 5/9/2006 11:23:23 AM

Printed: 05/09/2006

12:54:12 PM

Analyst: System

Sample ID: dwk-ii-97

Vial: N/A

Injection Volume: 0

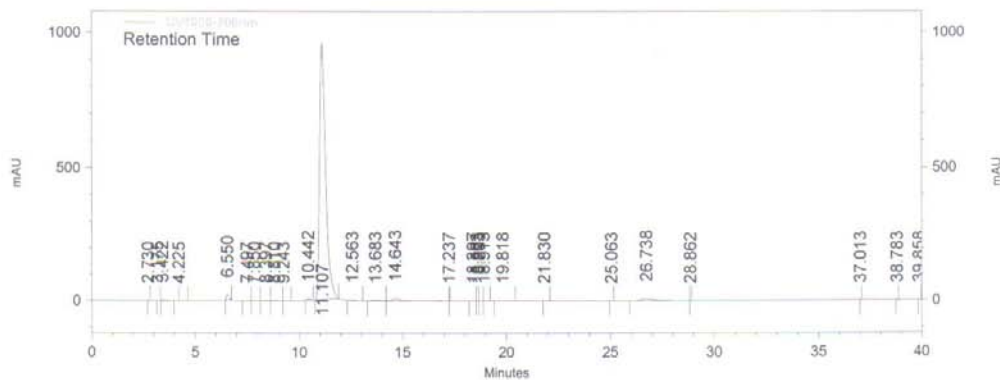

UV1000-280nm  
 Results (System  
 (5/9/2006  
 12:53:19 PM)  
 (Reprocessed))

| Name | Retention Time | Area     | Area Percent | Integration Codes |
|------|----------------|----------|--------------|-------------------|
|      | 2.730          | 46       | 0.000        | BD                |
|      | 3.175          | 399      | 0.002        | BB                |
|      | 3.422          | 9429     | 0.046        | BD                |
|      | 4.225          | 4443     | 0.022        | MM                |
|      | 6.550          | 192373   | 0.939        | MM                |
|      | 7.497          | 8145     | 0.040        | BV                |
|      | 7.850          | 6541     | 0.032        | VB                |
|      | 8.397          | 18787    | 0.092        | BV                |
|      | 8.810          | 16942    | 0.083        | VV                |
|      | 9.243          | 3137     | 0.015        | VB                |
|      | 10.442         | 47954    | 0.234        | MM                |
|      | 11.107         | 19513304 | 95.293       | MM                |
|      | 12.563         | 33331    | 0.163        | BB                |
|      | 13.683         | 57531    | 0.281        | BV                |
|      | 14.643         | 223687   | 1.092        | VD                |
|      | 17.237         | 27       | 0.000        | VB                |



**2-[4-[Cyclohexylidene(4-hydroxyphenyl)methyl]phenoxy]acetic acid (44).**

**Reverse Phase** (Method H<sub>2</sub>O:MeOH:AcOH 20:80:0.1, Flow rate 1mL/min)

**Area Percent Report**

Page 1 of 2

Data File: D:\DWKIM\dwk-i-199rp.dat  
 Acquired: 5/3/2006 10:56:24 AM  
 03:18:34 AM

Printed: 05/22/2006

Analyst: System

Sample ID: dwk-i-199

Vial: N/A

Injection Volume: 0

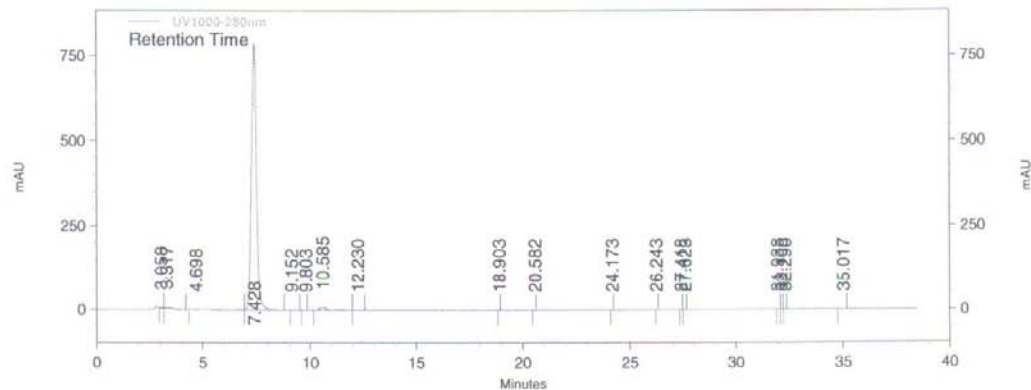

UV1000-280nm  
 Results (System)  
 (5/3/2006  
 11:34:57 AM)  
 (Reprocessed)  
 (Aborted Run))

| Name | Retention Time | Area     | Area Percent | Integration Codes |
|------|----------------|----------|--------------|-------------------|
|      | 3.058          | 13849    | 0.107        | BV                |
|      | 3.317          | 15498    | 0.120        | VD                |
|      | 4.698          | 45724    | 0.354        | BD                |
|      | 7.428          | 12668276 | 98.061       | VB                |
|      | 9.152          | 939      | 0.007        | BB                |
|      | 9.803          | 245      | 0.002        | BB                |
|      | 10.585         | 168149   | 1.302        | BD                |
|      | 12.230         | 4789     | 0.037        | BB                |
|      | 18.903         | 75       | 0.001        | BD                |
|      | 20.582         | 107      | 0.001        | BD                |
|      | 24.173         | 69       | 0.001        | BB                |
|      | 26.243         | 59       | 0.000        | BB                |
|      | 27.418         | 79       | 0.001        | BB                |
|      | 27.623         | 123      | 0.001        | BB                |

Normal Phase (Method *i*-PrOH:CH<sub>2</sub>Cl<sub>2</sub>:AcOH 10:90:0.5, Flow rate 1mL/min)

### Area Percent Report

Page 1 of 2

Data File: D:\DWKIM\dwk-i-199np.dat

Acquired: 5/12/2006 4:17:30 PM

Printed: 05/22/2006

03:19:13 AM

Analyst: System

Sample ID: dwk-i-199

Vial: N/A

Injection Volume: 0

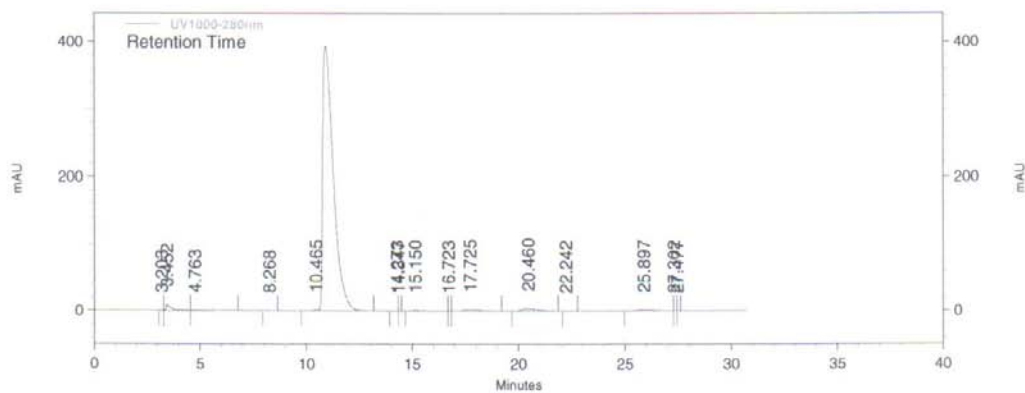

UV1000-280nm

Results (System

5/12/2006

4:48:25 PM)

(Reprocessed)

(Aborted Run))

| Name | Retention Time | Area     | Area Percent | Integration Codes |
|------|----------------|----------|--------------|-------------------|
|      | 3.203          | 3545     | 0.025        | BD                |
|      | 3.452          | 182366   | 1.280        | BD                |
|      | 4.763          | 37876    | 0.266        | VD                |
|      | 8.268          | 3274     | 0.023        | BB                |
|      | 10.465         | 13652989 | 95.858       | BD                |
|      | 14.273         | 984      | 0.007        | BV                |
|      | 14.347         | 253      | 0.002        | VB                |
|      | 15.150         | 22620    | 0.159        | BD                |
|      | 16.723         | 62       | 0.000        | BB                |
|      | 17.725         | 98306    | 0.690        | BB                |
|      | 20.460         | 160063   | 1.124        | BD                |
|      | 22.242         | 2043     | 0.014        | BB                |
|      | 25.897         | 77998    | 0.548        | BV                |
|      | 27.302         | 482      | 0.003        | VV                |

**6-[4-[bicyclo[3.3.1]non-9-ylidene(phenyl)methyl]phenoxy]hexanoic acid (46).**

**Reverse Phase** (Method H<sub>2</sub>O:MeOH:AcOH 5:95:0.1, Flow rate 1mL/min)

**Area Percent Report**

Page 1 of 2

Data File: D:\DWKIM\dwk-ii-93rp-6.dat  
 Acquired: 5/4/2006 3:45:00 PM  
 PM

Printed: 05/04/2006 04:25:16

Analyst: System

Sample ID: dwk-ii-93

Vial: N/A

Injection Volume: 0

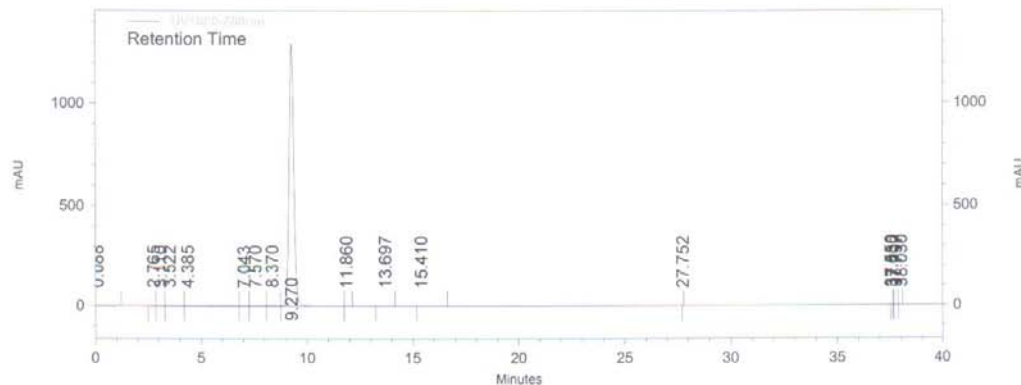

UV1000-280nm  
 Results (System  
 5/4/2006  
 4:25:10 PM)  
 (Reprocessed)  
 (Aborted Run)

| Name | Retention Time | Area     | Area Percent | Integration Codes |
|------|----------------|----------|--------------|-------------------|
|      | 0.088          | 27366    | 0.135        | BD                |
|      | 2.765          | 7896     | 0.039        | BD                |
|      | 3.110          | 10759    | 0.053        | BV                |
|      | 3.522          | 35802    | 0.176        | VD                |
|      | 4.385          | 70705    | 0.348        | VD                |
|      | 7.043          | 8268     | 0.041        | VV                |
|      | 7.570          | 23610    | 0.116        | VV                |
|      | 8.370          | 47902    | 0.236        | VV                |
|      | 9.270          | 20088064 | 98.760       | VD                |
|      | 11.860         | 2114     | 0.010        | VB                |
|      | 13.697         | 16472    | 0.081        | BB                |
|      | 15.410         | 869      | 0.004        | BD                |
|      | 27.752         | 61       | 0.000        | BD                |
|      | 37.550         | 83       | 0.000        | BV                |

**Normal Phase** (Method EtOAc:Hx:AcOH 25:75:0.2, Flow rate 1mL/min)

**Area Percent Report**

Page 1 of 2

Data File: D:\DWKIM\dwk-ii-93-np.dat  
 Acquired: 5/9/2006 2:29:17 PM  
 AM

Printed: 05/22/2006 03:24:40

Analyst: System

Sample ID: dwk-ii-93

Vial: N/A

Injection Volume: 0

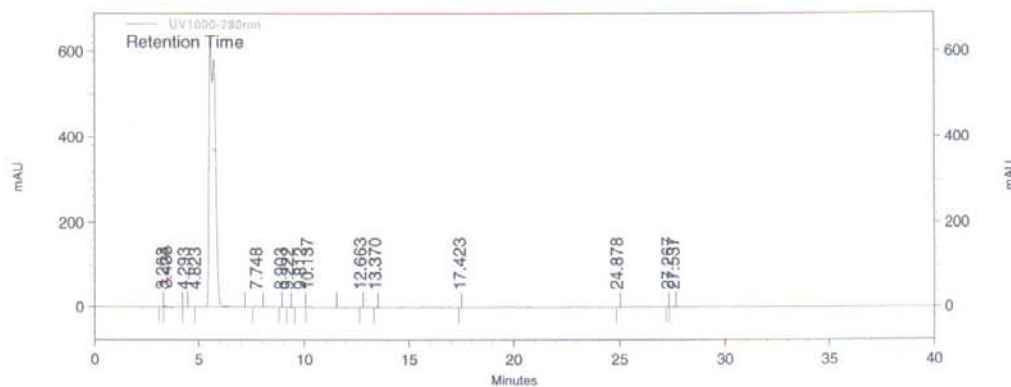

**UV1000-280nm**

**Results (System**

(5/22/2006

3:24:22 AM)

(Reprocessed)

(Aborted Run))

| Name | Retention Time | Area     | Area Percent | Integration Codes |
|------|----------------|----------|--------------|-------------------|
|      | 3.263          | 371      | 0.003        | BD                |
|      | 3.435          | 17457    | 0.139        | BD                |
|      | 4.293          | 826      | 0.007        | VB                |
|      | 4.823          | 12576776 | 99.789       | BD                |
|      | 7.748          | 1485     | 0.012        | BB                |
|      | 8.903          | 105      | 0.001        | BB                |
|      | 9.222          | 105      | 0.001        | BB                |
|      | 9.812          | 5262     | 0.042        | BV                |
|      | 10.137         | 294      | 0.002        | VD                |
|      | 12.663         | 131      | 0.001        | BB                |
|      | 13.370         | 115      | 0.001        | BB                |
|      | 17.423         | 68       | 0.001        | BD                |
|      | 24.878         | 114      | 0.001        | BD                |
|      | 27.267         | 66       | 0.001        | BB                |
